# Supplementary material for: Expression Profiling of Cucumis sativus in Response to Infection by Pseudoperonospora cubensis
Source: PLOS journal article supplement (doi:10.1371/journal.pone.0034954), 2012-04-24
Supplement: S1 (10.1371/journal.pone.0034954.s001) [file journal.pone.0034954.s001]

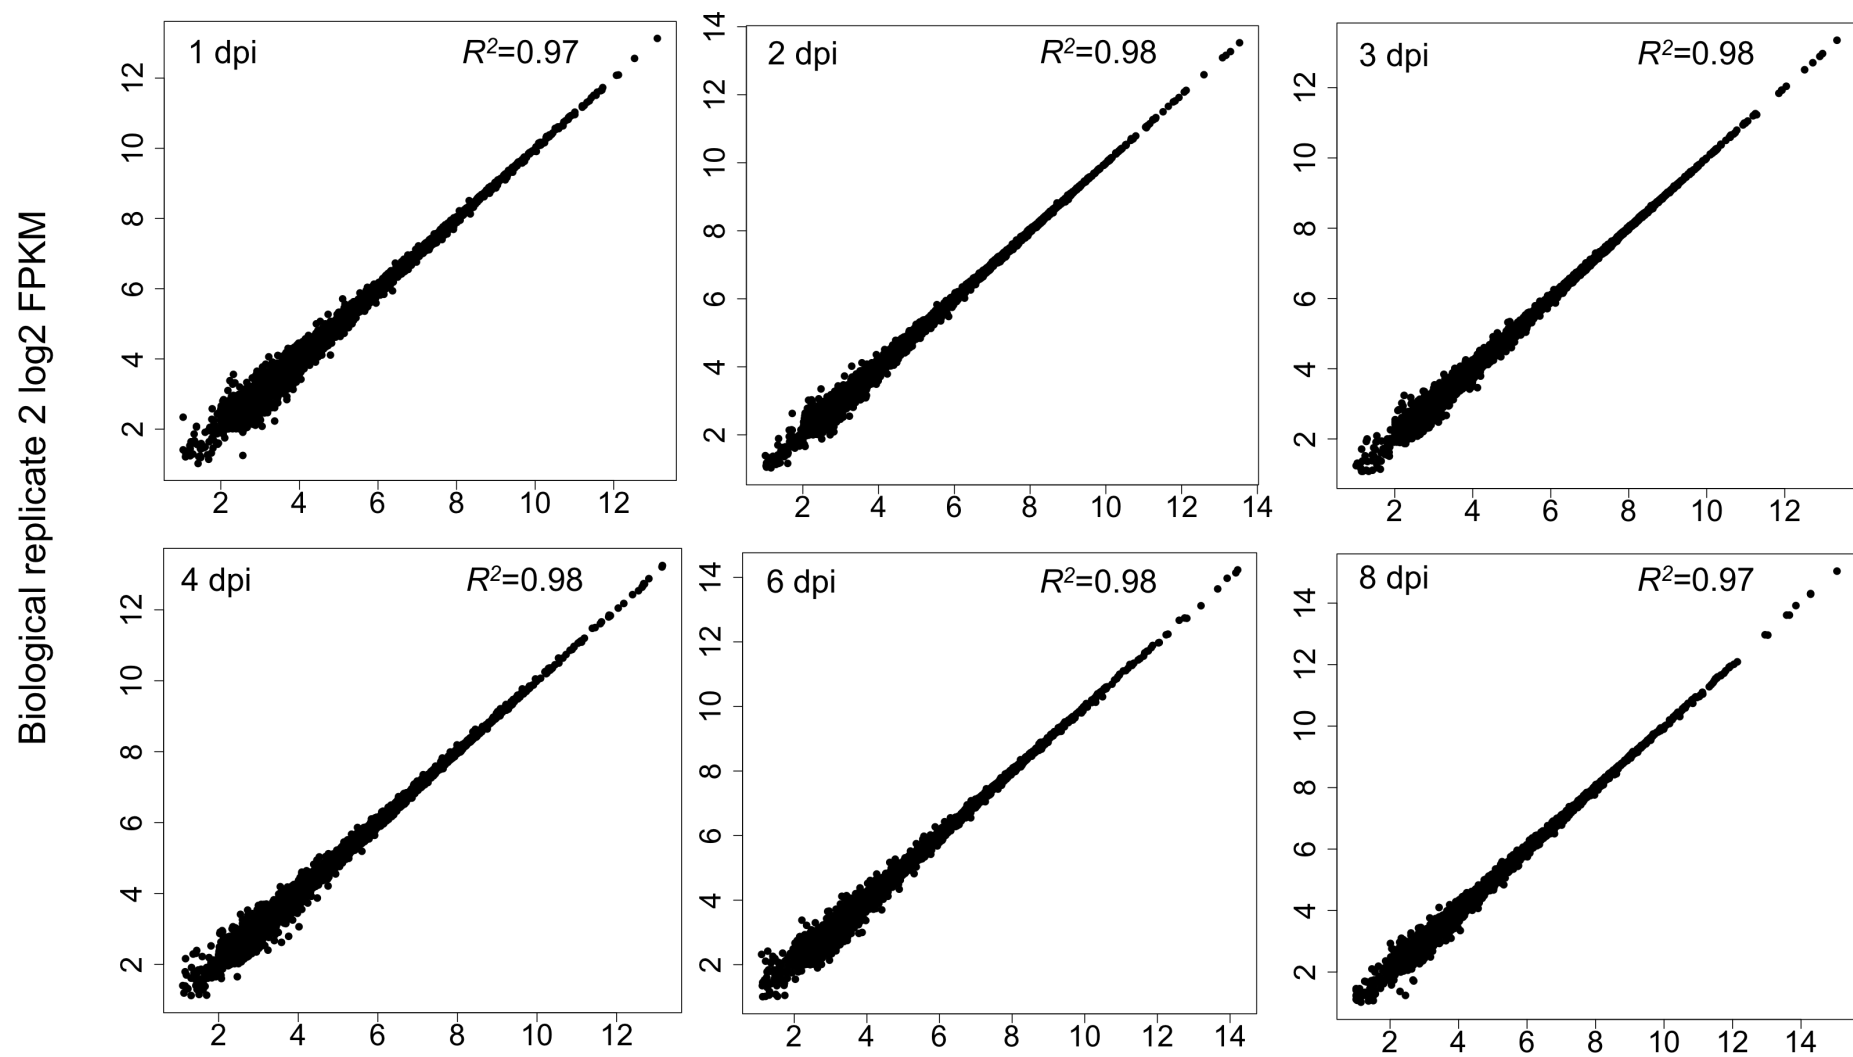

Biological replicate 1 log2 FPKM

Figure S1, Adhikari et al.
