# Supplementary material for: Expression Profiling of Cucumis sativus in Response to Infection by Pseudoperonospora cubensis
Source: PLoS One. 2012 Apr 24;7(4):e34954. doi: 10.1371/journal.pone.0034954 (PMC3335828; doi:10.1371/journal.pone.0034954)
Supplement: Table S1 — List of Cucumis sativus genes expressed following infection with Pseudoperonospora cubensis . Gene ID, expression values (fragments per kilobase pair of exon model per million fragments mapped, FPKM) at different time points, and their functional annotation are shown. (XLS) [file pone.0034954.s003.xls]

## Sheet: TableS1
Table S1. List of C. sativus genes expressed in mock and during infection with Ps. cubensis. Shown is the gene ID, expression values (FPKM) at different time points and their functional annotation.
Gene ID	MOCK	1 dpi§	2 dpi	3 dpi	4 dpi	6 dpi	8 dpi	Functional annotation
Csa3M110620.1	7311.66	317.653	327.53	223.154	239.608	244.35	125.493	Elongation factor 1-gamma
Csa7M056470.1	7139.41	439.967	349.708	211.977	181.197	233.459	257.096	Actin
Csa7M447830.1	6556.65	59.6093	92.8902	86.327	78.823	60.0674	36.9596	60S ribosomal protein L7-4
Csa3M556200.1	5621.35	22.9116	17.7971	14.4004	25.1787	17.9925	19.6076	Heat shock protein
Csa3M857060.1	5420.56	15.6777	8.43153	7.3212	13.0295	7.58842	7.42359	Gene of unknown function
Csa4M038770.1	5413.37	12.1155	7.00275	5.75138	4.3123	9.14801	0	40S ribosomal protein SA
Csa1M537560.1	5259.17	265.087	141.668	66.4718	102.687	124.946	71.267	Beta-tubulin
Csa3M110630.1	5194.31	198.88	283.727	226.441	216.795	212.728	133.77	Elongation factor 1 gamma
Csa3M389830.1	5173.24	171.315	172.266	203.179	175.487	180.814	150.16	Actin-depolymerizing factor 6
Csa2M369060.1	4423.62	414.346	564.258	362.27	392.772	356.111	214.923	40S ribosomal protein S6
Csa3M750390.1	4416	21.6293	12.3009	18.2702	19.1796	20.2766	16.2691	Gene of unknown function
Csa3M135010.1	4261.56	266.291	411.288	338.812	291.671	234.149	134.313	60S ribosomal protein L7-4
Csa5M152800.1	4255.81	227.207	419.687	214.362	232.637	176.344	129.129	40S ribosomal protein S10
Csa3M403970.1	4207.93	205.857	541.02	193.576	228.403	210.7	153.652	60S ribosomal protein L8
Csa3M687730.1	4199.51	186.625	140.885	228.115	256.556	56.6711	59.6729	Ribosomal protein
Csa4M295440.1	3872.32	848.881	1362.55	253.718	500.308	616.249	629.005	Heat shock protein 70
Csa5M495920.1	3368.79	354.301	193.415	198.688	143.604	309.409	86.9948	Elongation factor 1-alpha
Csa3M062610.1	3232.64	30.3815	29.9091	28.3312	28.6242	29.7404	20.5752	Mitochondrial import inner membrane translocase subunit Tim17/Tim22/Tim23 family protein
Csa3M634310.1	3228.5	31.2806	46.634	47.5412	39.5667	31.6594	30.0385	Heat shock protein 70 (HSP70)-interacting protein
Csa3M912980.1	3221.53	18.5581	30.3529	29.4101	17.348	19.4043	11.8125	60S ribosomal protein L7
Csa3M734930.1	3210.65	9.38506	38.1899	18.5292	21.7841	16.4717	12.2333	Histone H2B
Csa3M143540.1	3202.39	213.061	34.6276	67.5035	130.52	45.0447	49.9923	DNA-directed RNA polymerase II 19 kD polypeptide rpb7
Csa1M024170.1	3173.24	168.495	325.804	169.084	189.488	166.438	103.942	40S ribosomal protein S7
Csa6M000080.1	2856.86	8869.08	6149.29	8021.04	4647.57	3208.43	1844.89	Galactinol synthase
Csa7M398090.1	2512.17	4301.37	794.461	2016.26	1953.8	6909.89	3450.4	Protein induced upon tuberization
Csa6M507370.1	2426.98	3318.6	274.236	498.325	1030.09	657.365	536.723	P1
Csa3M154390.1	2393.31	3370.95	2543.22	3695.01	2232.2	3340.91	1612.77	Translationally-controlled tumor protein homolog
Csa4M443120.1	2353.02	53.4512	82.3717	47.6581	67.0166	68.6593	72.5518	4,5-DPA dioxygenase extradiol
Csa7M446990.1	2321.63	21.4572	42.9554	27.7625	41.088	29.1109	29.991	30S ribosomal protein S17
Csa5M495940.1	2286.68	284.211	148.552	134.707	115.311	264.71	71.3215	Elongation factor 1-alpha
Csa3M822300.1	2243.34	200.869	1688.58	325.445	514.921	271.638	589.26	Gene of unknown function
Csa7M428890.1	2194.1	196.449	135.835	73.5405	98.3275	83.0073	81.4395	DNA binding protein
Csa4M017200.1	2132.43	130.271	57.1989	48.6572	85.4047	129.371	33.6654	Gene of unknown function
Csa6M366310.1	2120.21	21.2075	23.9406	39.0935	27.2815	27.8925	21.694	F-box/ankyrin repeat protein SKIP35
Csa4M286960.1	2024.01	3067.26	419.157	336.615	486.944	473.833	310.264	Lipoxygenase
Csa3M105950.1	2017.13	2992.31	11862.7	10341.2	5422.5	2513.07	3828.05	Metallothionein type 3
Csa2M420990.1	1807.54	2666.15	56.925	84.099	51.1857	779.885	762.434	Isocitrate lyase
Csa1M696520.1	1771.18	2879.25	1379.75	1186.25	1331.73	2136.38	1351.25	Phosphorylase protein
Csa4M025140.1	1720.56	2759.94	137.424	161.506	449.313	1490.93	824.811	Glutamate dehydrogenase
Csa6M517220.1	1593.04	2555.55	356.906	316.253	1215	1238.47	837.794	Stem-specific protein TSJT1
Csa1M008420.1	1519.09	17.0667	17.2791	16.3505	11.2586	14.1315	12.5442	Conserved gene of unknown function
Csa6M087790.1	1518.55	19.5256	16.3433	35.3099	38.2941	27.8072	26.1908	Eukaryotic translation initiation factor 3 subunit
Csa5M613470.1	1514.54	2443.91	889.799	1170.06	848.399	1570.67	645.174	DnaJ protein homolog
Csa5M609710.1	1441.52	2356.03	3213.85	2423.11	6469.53	1503.65	1246.25	Ribulose bisphosphate carboxylase small chain, chloroplastic
Csa2M403670.1	1213.45	13.5891	14.3276	15.5688	16.174	10.9935	12.9873	DNA-directed RNA polymerase II
Csa3M121660.1	1132.56	29.2659	23.5982	24.2666	34.5938	33.6602	22.6234	50S ribosomal protein L5
Csa2M139820.1	1014.62	1994.78	3523.7	1320.08	1880.92	1802.02	1163.76	Elongation factor 1-alpha
Csa6M495020.1	998.997	90.636	25.9519	28.9238	84.7752	96.011	56.4524	LB domain-containing protein
Csa5M647300.1	989.122	10.9715	0	0	0	6.01838	0	RING-H2 finger protein ATL58
Csa6M014610.1	985.407	87.0751	54.0591	63.1163	57.4398	77.3116	57.3312	Elongation factor
Csa5M027940.1	978.66	2060.13	27.616	24.27	10.4104	105.68	27.8261	Cell number regulator 2
Csa4M420130.1	974.424	78.9667	30.7205	54.7056	67.5068	72.3092	67.9112	Conserved gene of unknown function
Csa2M258680.1	973	72.509	153.656	87.0426	74.5423	67.4098	44.1061	40S ribosomal protein S12
Csa5M515040.1	969.203	931.182	336.678	563.467	254.745	372.788	86.3029	Conserved gene of unknown function
Csa4M641600.1	957.584	881.553	838.475	606.548	757.041	783.398	907.819	Cysteine protease
Csa3M271360.1	948.885	967.174	558.984	762.326	539.259	1277.45	421.533	S-adenosylmethionine decarboxylase proenzyme
Csa3M153740.1	938.963	37.0599	65.1291	52.821	39.3537	41.4051	28.2171	60S ribosome subunit biogenesis protein NIP7
Csa4M094520.1	938.31	1928.33	1146.95	465.682	720.901	1169.26	606.491	14-3-3 protein 2
Csa5M652270.1	933.252	34.8254	52.443	66.6525	52.3808	85.4764	59.1434	ATP-dependent protease La (LN) domain-containing protein
Csa2M247040.1	930.262	813.967	2189.82	2127.31	993.793	1303.74	1801.1	Glycine-rich RNA-binding protein
Csa7M447790.1	917.005	17.413	10.2044	14.0256	8.01893	14.596	8.21321	Poly(RC)-binding protein
Csa7M278730.1	915.331	14.1181	11.9428	21.3961	16.3939	18.8928	18.1701	Conserved gene of unknown function
Csa6M187950.1	912.319	12.0679	21.5189	19.0076	24.148	15.9906	15.4128	50S ribosomal protein L4
Csa1M587990.1	902.704	927.628	23.7021	39.9292	82.515	159.221	59.7036	Beta-galactosidase
Csa1M480180.1	893.785	911.388	706.929	751.394	733.852	675.879	491.396	Actin depolymerizing factor
Csa2M021580.1	884.406	6.55027	0	4.0907	0	6.93478	4.11029	Heat-shock protein
Csa2M010390.1	879.71	1837.51	830.673	1648.03	3599.97	12933.1	19927.2	Wound-induced protein WIN2
Csa4M000860.1	877.4	1872.47	2416.1	5817.59	6372.56	18966	19862.6	Gene of unknown function
Csa3M777590.1	869.482	62.0154	188.955	95.6904	96.549	78.8747	55.5381	40S ribosomal protein S14
Csa3M131950.1	866.172	855.472	600.181	751.036	536.962	959.286	448.126	Cytochrome b5 isoform Cb5-C
Csa2M234550.1	863.54	857.497	551.961	757.466	494.405	864.739	674.642	Nuclear acid binding protein
Csa4M001980.1	861.621	839.516	1143.45	1218.9	1006.97	1341.68	848.038	Ribosomal protein L19
Csa1M051750.1	853.242	50.3026	34.3733	35.4073	33.6253	29.6005	25.8723	Conserved gene of unknown function
Csa1M600260.1	852.53	866.185	1291.32	1087.5	804.958	821.678	819.106	Calmodulin-7
Csa4M038680.1	837.85	844.301	185.737	392.824	268.406	573.489	258.471	Gene of unknown function
Csa4M651970.1	828.47	1885.89	2118.09	1751.17	1342.89	1411.87	781.742	Eukaryotic translation initiation factor 5A
Csa3M128920.1	825.909	29.258	28.7207	51.3965	20.399	17.4818	11.0144	30S ribosomal protein S7, chloroplastic
Csa4M063450.1	822.601	23.6172	16.4584	22.2479	20.0708	22.4201	15.3719	ATP-dependent RNA helicase
Csa2M193330.1	819.78	20.6888	25.2315	25.2932	25.394	17.9831	18.6333	DNA-directed RNA polymerase II 19 kD polypeptide rpb7
Csa4M062380.1	815.051	815.347	103.423	92.4004	130.707	304.223	118.221	Serine hydroxymethyltransferase
Csa5M154220.1	813.187	14.6696	24.8868	14.3507	14.1332	14.8184	8.81894	Ribosomal protein .1/L10e family
Csa7M268490.1	810.195	10.4343	22.4787	20.0888	12.3824	11.9687	11.3045	Conserved gene of unknown function
Csa5M289620.1	801.07	0	0	0	0	0	0	Pentatricopeptide repeat-containing protein
Csa1M008570.1	800.321	786.043	2150.01	2342.19	2341.37	1972.1	2991.64	Hypersensitive-induced response protein
Csa6M514920.1	793.516	742.943	717.734	750.41	616.55	482.83	536.525	Gene of unknown function
Csa3M829270.1	790.152	806.835	17.8853	20.7342	21.146	99.0861	58.4721	Alpha-dioxygenase
Csa2M007400.1	788.515	7.56228	5.51254	7.93806	5.6094	6.507	5.15935	Actin arp6
Csa6M518000.2	784.74	1680.51	215.007	442.899	313.75	1262.83	524.746	Auxin-repressed protein
Csa3M842710.1	782.583	788.272	367.757	310.155	313.954	544.17	307.498	Tubulin alpha chain
Csa6M095940.1	780.596	789.082	91.9723	66.625	75.6795	202.051	102.032	Soluble inorganic pyrophosphatase
Csa6M366530.1	777.009	771.032	579.87	225.731	336.322	236.386	181.906	Alpha-1,4-glucan-protein synthase [UDP-forming]
Csa1M003450.2	768.599	9.26405	13.5926	12.3862	15.3289	11.9376	13.1884	Leucine-rich repeat-containing protein
Csa5M155450.1	766.642	691.417	4297.09	3890.45	9031.65	9412.01	12911.9	Smotin
Csa6M448180.1	763.721	4.98306	16.3794	7.91568	10.6227	0	0	Histone H2B
Csa1M574840.1	763.36	1756.46	209.137	198.806	270.999	1026.03	478.891	Cytidine/deoxycytidylate deaminase family protein
Csa4M056610.1	753.623	621.233	1070.51	529.321	596.436	653.265	1143.54	Glycine and proline rich protein 4
Csa1M250130.1	747.126	757.997	223.646	190.665	130.72	356.926	486.085	Short-chain dehydrogenase
Csa6M423990.1	742.948	713.586	243.153	270.21	892.703	478.645	658.972	Protein SSM1
Csa1M574940.1	738.436	30.32	68.3428	35.2698	36.6648	30.2123	42.7863	Mitochondrial import inner membrane translocase subunit tim17
Csa5M627090.1	732.514	606.074	1477.31	643.045	793.81	961.312	1833.15	Desacetoxyvindoline 4-hydroxylase
Csa4M286950.1	730.671	743.895	148.76	211.381	115.024	106.553	75.7136	Lipoxygenase
Csa3M146300.1	723.571	760.417	717.37	696.643	625.065	545.359	513.65	Acireductone dioxygenase
Csa3M171830.1	719.543	17.2591	11.0443	14.3998	12.6273	14.8545	9.59121	Methyltransferase family protein
Csa1M574870.1	714.466	705.024	525.705	234.954	399.308	402.882	258.17	Malic enzyme
Csa6M135970.1	706.739	719.941	385.619	445.318	338.635	466.221	368.253	LEM3 (Ligand-effect modulator 3) family protein
Csa2M358870.1	684.756	82.9583	539.109	571.808	250.26	30.854	201.518	Calmodulin 4
Csa3M734190.1	677.335	5.97108	5.94345	6.05082	7.81115	7.37787	15.6653	Gene of unknown function
Csa3M730710.1	676.71	624.034	825.341	425.087	421.883	316.364	571.28	Conserved gene of unknown function
Csa7M432470.1	670.918	647.143	1364.93	591.654	896.879	592.932	1037.07	Stellacyanin
Csa3M777610.1	660.633	57.4058	88.4186	52.7321	46.8389	52.5025	25.4599	40S ribosomal protein S14
Csa3M585860.1	660.277	684.373	264.517	493.754	257.111	710.637	270.428	B2 protein
Csa4M290220.1	657.295	6.54653	152.41	39.181	44.3154	8.82999	6.46503	Histone H3.2
Csa1M599420.2	656.939	671.406	413.665	676.725	405.936	526.807	261.607	RNA-binding protein
Csa7M037610.1	653.93	1693.66	8680.4	6731.21	6007.96	3743.1	3010.02	Pathogen-induced protein CuPi1
Csa4M652690.1	649.079	533.325	563.459	155.451	541.039	1074	141.424	Conserved gene of unknown function
Csa6M109780.1	646.652	626.877	109.508	64.7438	61.0912	310.38	229.148	Vacuolar calcium binding protein
Csa6M133710.1	643.5	1581.14	1473.94	1549.39	1956.17	2828.36	4223.3	Cinnamate-4-hydroxylase
Csa1M348950.1	637.148	677.451	325.47	383.517	536.997	980.981	1484.61	Blue copper protein
Csa3M698540.1	635.494	37.4169	36.0474	32.5639	38.5363	32.5761	26.9199	Eukaryotic translation initiation factor 3 subunit
Csa2M382730.1	627.004	29.9573	18.0746	25.8574	22.908	24.9821	20.4693	RNA binding protein
Csa3M077650.1	622.686	22.745	10.6726	12.1921	11.5571	15.1538	9.54255	ATP-dependent RNA helicase
Csa1M589640.1	619.61	17.477	31.9947	43.8278	29.9711	20.9336	16.2449	30S ribosomal protein S16
Csa4M658570.1	618.06	641.038	252.837	893.967	464.622	433.407	344.921	BTB/PZ domain-containing protein
Csa7M268480.1	614.861	15.1762	18.7795	19.0625	16.9943	14.713	12.025	Conserved gene of unknown function
Csa3M271350.1	612.978	603.492	297.699	322.837	312.434	751.725	214.865	S-adenosylmethionine decarboxylase
Csa1M613490.1	612.171	11.2348	14.1449	8.89868	8.14788	9.20117	8.62488	Cytochrome c biogenesis protein CcmE family
Csa4M629470.1	610.645	630.342	75.9682	124.578	148.615	338.121	430.477	Aromatic amino acid transaminase
Csa3M710780.1	605.676	639.249	50.2584	184.737	353.625	310.536	307.416	Chaperone protein dnaJ 8, chloroplast
Csa2M009440.1	605.34	579.257	32.7637	146.957	154.785	343.756	156.39	Serine-rich protein
Csa1M525300.1	601.481	562.886	9.84296	26.6718	55.633	33.4195	7.10506	Conserved gene of unknown function
Csa6M405880.1	597.406	591.447	748.806	880.494	747.461	915.148	643.451	Ubiquitin 5
Csa3M116790.1	596.463	512.438	5.07984	0	0	61.4677	0	Uclacyanin-2
Csa1M073640.1	595.375	527.27	298.462	612.686	652.927	844.355	2141.58	Polyphenol oxidase
Csa3M734260.1	594.781	600.52	700.307	955.443	1200.47	788.416	1420.86	Type-2 metallothionein
Csa7M239570.1	589.364	600.821	222.653	470.825	359.139	739.429	358.444	Defective in cullin neddylation protein
Csa3M889670.1	587.16	579.02	181.627	204.227	206.876	218.947	131.268	Cryptochrome 1
Csa3M035330.1	582.389	79.2589	158.274	52.1149	111.709	62.9534	51.3874	Heat shock protein 70 (HSP70)-interacting protein
Csa7M432030.1	574.992	551.072	645.389	616.142	440.146	390.627	197.479	40S ribosomal protein S12
Csa3M710790.1	571.823	596.714	79.1304	170.183	497.882	231.501	389.024	Chaperone protein dnaJ 8, chloroplast
Csa6M006740.1	568.823	610.181	691.58	862.303	646.547	635.275	614.048	Bypass1
Csa6M029440.1	567.756	583.291	115.283	107.512	181.09	190.857	175.861	GTP cyclohydrolase II/3,4-dihydroxy-2-butanone 4-phosphate synthase
Csa4M000820.1	566.13	1554.45	1302.12	1553.21	2150.16	4854.09	7936.1	Gene of unknown function
Csa6M365210.1	564.094	587.897	136.119	248.574	376.861	317.757	440.919	Protein AFR
Csa3M817720.1	554.181	551.016	391.985	747.682	470.788	670.318	547.127	R3h domain containing protein
Csa3M035890.1	553.749	58.9734	117.377	66.2967	67.1177	43.4622	29.6342	40S ribosomal protein S13
Csa7M452200.1	550.47	587.875	1133.74	700.177	811.289	535.991	406.079	BRASSINSTERID INSENSITIVE 1-associated receptor kinase 1
Csa6M501980.1	550.383	507.845	123.469	158.673	121.395	212.11	123.197	Minor allergen
Csa1M050420.1	549.736	544.254	592.365	431.073	384.592	611.21	282.763	Elongation factor 1 beta
Csa1M470410.1	549.515	8.89651	8.77623	29.9032	16.5406	13.1748	34.7715	Receptor kinase
Csa1M023070.1	544.26	1490.97	225.845	671.185	358.773	1421.09	291.638	Conserved gene of unknown function
Csa4M062370.1	543.723	43.4772	13.0471	0	14.4667	35.4481	20.751	Gene of unknown function
Csa4M438540.1	542.416	525.618	751.981	153.339	536.129	1370.12	175.779	Conserved gene of unknown function
Csa1M050010.1	540.337	0.0117409	0.010418	0.0226705	0.0372053	0.0411631	0.0293256	Gene of unknown function
Csa4M308630.1	538.086	38.4091	68.5325	53.7721	68.1604	44.1541	35.832	30S ribosomal protein S31, chloroplastic
Csa5M366670.1	536.177	458.274	51.1385	0	6.96194	0	20.6108	Allene oxide cyclase
Csa6M183190.1	534.709	552.97	73.8728	180.778	401.138	883.446	478.933	Asparagine synthetase
Csa1M575130.1	533.547	554.738	472.675	554.93	682.417	381.711	437.764	Myo-inositol oxygenase 2
Csa5M515020.1	533.473	550.476	759.043	1160.72	851.571	1055.95	955.993	CASP RCM_1206790
Csa2M249900.1	532.605	539.095	468.485	335.598	503.585	627.672	623.104	Cysteine protease
Csa7M427110.1	527.828	28.0721	28.6165	34.356	30.3044	33.9133	26.2	Actin
Csa3M543170.1	527.393	517.842	174.566	142.402	115.746	261.482	273.923	ATP/ADP transporter
Csa1M057000.1	522.389	26.2294	23.7615	34.9684	23.5782	28.1977	14.4143	50S ribosomal protein L7/L12
Csa1M073630.1	522.177	17.1077	0	0	0	4.3168	0	Gene of unknown function
Csa7M033410.1	518.814	518.055	246.264	485.598	230.903	477.825	597.613	Auxin-induced in root cultures protein 12
Csa2M295950.1	514.569	12.5397	18.9477	19.817	18.1542	12.5477	7.25364	50S ribosomal protein L25
Csa2M010290.1	512.296	12.9146	16.4651	12.3384	14.1034	12.1886	9.05052	Ankyrin repeat-containing protein
Csa7M017160.1	512.264	521.644	26.9233	53.1604	89.5394	176.213	137.02	ACT-domain-containing protein kinase
Csa2M352930.1	510.274	524.1	28.6118	103.566	97.9256	475.966	285.643	Branched-chain-amino-acid aminotransferase
Csa6M363520.1	508.219	529.23	129.675	260.319	117.185	85.8413	104.663	Embryogenesis transmembrane protein
Csa6M499800.1	503.014	503.289	276.695	460.126	270.053	390.888	413.552	3-deoxy-D-arabino-heptulosonate-7-phosphate synthase 01
Csa1M063530.1	500.621	474.575	430.83	483.917	337.446	506.903	319.845	Nuclear acid binding protein
Csa2M252100.1	498.69	471.444	1491.81	508.742	946.347	1887.2	1015.21	Conserved gene of unknown function
Csa4M608140.1	498.673	497.065	484.834	471.857	332.156	400.874	192.305	Wrp15a
Csa3M779000.1	498.605	479.748	0	0	0	6.58297	0	Syntaxin, plant
Csa2M360060.1	494.498	458.896	4.75988	11.1246	0	169.359	30.136	Gibberellin receptor GID1
Csa6M358680.1	492.96	465.87	532.953	340.29	208.155	231.941	102.301	Carboxy-lyase
Csa2M360050.1	490.225	505.601	142.926	112.769	132.569	229.109	103.685	SJNBa0033G16.15 protein
Csa2M356660.1	482.374	471.891	636.925	445.907	364.957	375.225	248.279	Adenine nucleotide translocator
Csa1M025180.1	479.221	436.132	707.691	705.232	442.801	647.415	598.421	Conserved gene of unknown function
Csa1M528510.2	479.004	468.422	46.3357	130.607	51.4582	379.175	340.266	Conserved gene of unknown function
Csa5M643300.1	475.988	472.783	182.871	136.604	299.307	258.859	242.959	Proline dehydrogenase
Csa2M129150.1	475.743	453.502	495.039	245.298	313.925	405.464	478.244	3-ketoacyl-CoA thiolase
Csa3M142910.1	475.55	1526.87	0	0	0	43.1093	0	Type I proteinase inhibitor
Csa5M623470.1	474.25	1473.97	557.815	1127.98	755.673	758.868	778.914	ML1
Csa3M842740.1	471.628	437.765	320.81	325.677	168.81	130.024	189.596	Gene of unknown function
Csa5M458280.1	470.895	419.236	309.809	464.114	261.475	372.579	203.468	Conserved gene of unknown function
Csa7M073530.1	465.337	454.978	487.554	434.898	301.031	347.393	268.223	Poly(A)-binding protein
Csa2M074240.1	465.026	414.854	223.927	164.193	497.804	228.153	207.069	Photosystem I reaction center subunit XI, chloroplastic
Csa1M039880.1	464.382	458.502	424.482	153.927	151.114	196.778	127.533	Alpha-1,4-glucan-protein synthase [UDP-forming]
Csa7M450710.1	462.575	470.802	385.985	506.712	338.804	546.236	291.619	Helicase
Csa1M573650.1	457.935	468.553	32.3956	48.1059	131.728	127.937	54.7834	Light-inducible protein CPRF2
Csa4M646190.1	456.419	444.97	387.445	369.489	180.851	398.599	208.999	Carboxy-lyase
Csa2M370530.1	450.59	463.184	45.7195	39.2912	54.5468	33.0013	37.6459	MSCS-like 2 protein
Csa3M176340.1	447.242	427.827	631.147	599.237	430.168	447.139	265.33	Ribosomal protein S10, eukaryotic and archaeal form
Csa4M309150.1	445.754	452.827	311.234	472.349	285.432	458.428	312.585	DNA-binding protein MNB1B
Csa3M823040.2	444.813	49.5199	11.3604	13.7844	10.1897	17.094	17.0096	Conserved gene of unknown function
Csa4M331080.1	440.708	437.623	306.927	332.442	274.904	380.261	383.628	Surfactant protein B containing protein
Csa3M808890.1	439.967	5.97474	6.46911	0	5.72147	0	0	Gene of unknown function
Csa1M595890.1	439.668	425.962	108.797	28.5202	41.3042	35.9858	36.9935	12-oxophytodienoate reductase opr
Csa3M732450.1	437.173	8.19822	0	0	0	0	0	Gene of unknown function
Csa2M252050.1	435.15	407.072	159.501	340.074	183.738	206.739	246.624	Arginine decarboxylase
Csa7M435550.1	434.577	435.637	32.1588	91.3028	129.464	239.004	210.01	D-glycerate 3-kinase, chloroplast
Csa3M101810.1	433.862	419.473	70.3626	88.7263	134.902	105.164	325.673	NAC domain-containing protein
Csa3M133890.1	433.167	0	18.3374	34.3294	19.2202	32.6173	32.3877	Glutathione s-transferase
Csa5M149330.1	432.746	427.645	1232.6	218.386	555.716	358.616	194.062	Heat shock protein 70
Csa2M223160.1	431.737	0	0	0	0	4.07479	0	5-methyltetrahydrofolate:homocysteine methyltransferase
Csa6M227020.1	428.798	415.419	129.93	163.513	122.65	128.673	37.8238	MRNA, clone: RAFL25-45-N18
Csa2M404870.1	420.884	434.779	14.6032	10.9274	13.0602	17.0184	8.02785	Gamma-glutamyl-gamma-aminobutyrate hydrolase
Csa1M025960.1	420.306	383.879	173.449	349.278	221.424	208.945	342.582	DNA-binding protein
Csa6M062320.1	419.204	357.2	527.04	828.34	503.209	428.15	952.938	Conserved gene of unknown function
Csa2M234560.1	417.963	420.372	334.666	361.709	214.886	325.559	259.291	Nuclear acid binding protein
Csa2M000770.1	416.21	404.196	600.504	538.371	441.082	376.453	276.425	Profilin
Csa3M893410.1	414.986	410.745	93.0978	201.406	214.215	504.792	462.755	Phosphoenolpyruvate carboxykinase [ATP]
Csa4M055980.1	414.832	9.69021	0	15.086	4.2098	7.74866	0	Gene of unknown function
Csa6M055360.1	414.246	435.958	101.005	248.976	108.743	312.125	259.889	GIGANTEA
Csa6M356990.1	413.44	3261.64	2914.02	3873.74	4202.1	3646.54	3239.99	Catalase
Csa6M010030.1	413.311	412.603	71.6646	181.353	214.209	120.329	525.694	Hs1pro-1-like receptor
Csa5M588730.1	413.022	419.876	822.344	489.063	497.823	449.167	286.299	60S ribosomal protein L5
Csa4M280500.1	410.921	368.969	502.198	117.718	342.826	202.839	132.798	F-box family protein
Csa1M599580.1	410.484	10.9627	15.8227	12.815	20.4697	15.1564	17.3907	5-methyltetrahydropteroyltriglutamate--homocysteine methyltransferase
Csa3M880030.1	407.37	401.146	325.001	380.98	246.095	601.024	212.79	Zinc finger family protein
Csa5M223070.1	406.926	388.496	567.875	653.242	376.999	431.301	311.936	WRKY protein
Csa6M006800.1	405.587	415.715	9.19636	17.8632	16.9337	51.3945	45.6795	1-aminocyclopropane-1-carboxylate synthase
Csa6M076720.1	405.535	452.49	170.738	191.354	267.487	210.904	105.945	Transcription activator
Csa5M604360.1	405.32	1462.59	1059.45	1567.87	959.064	1996.73	1232.57	Ubiquitin carrier protein
Csa5M182730.1	402.05	1372.25	1082.57	421.174	1701.59	257.607	164.201	Rubisco activase
Csa7M312940.1	399.583	345.252	3899.86	2488.81	7188.24	7199.37	8364.33	Extensin
Csa1M071870.1	396.387	391.111	353.509	215.964	459.497	624.586	483.902	Monosaccharide-H+ symporter
Csa7M209580.1	395.753	414.434	559.591	144.471	362.038	209.843	152.606	Eukaryotic translation initiation factor SUI1
Csa6M350360.1	395.289	407.885	0	0	0	0	0	ATP binding protein
Csa6M363020.1	394.169	383.23	339.043	312.076	166.233	142.932	114.593	Ankyrin repeat-containing protein
Csa6M395130.1	393.001	400.846	43.1428	34.0527	13.4518	113.286	38.4231	2-oxoisovalerate dehydrogenase E1 component, alpha subunit
Csa4M641670.1	391.43	343.053	21.7123	44.2324	21.8474	846.589	1022.86	L-asparaginase
Csa4M663680.1	389.248	394.862	309.796	407.086	225.644	444.53	215.685	HMG1/2
Csa3M116860.1	386.4	325.669	889.22	420.288	396.765	324.911	300.684	60S acidic ribosomal protein P1
Csa3M130290.1	385.345	390.069	704.611	514.712	397.728	446.4	397.534	Coiled-coil domain-containing protein
Csa1M058140.1	382.382	377.875	51.4393	148.177	63.1224	207.886	112.877	Esterase/lipase/thioesterase family protein
Csa5M524710.1	380.122	395.008	314.784	353.815	282.617	532.891	317.13	ADP-ribosylation factor A1B
Csa6M091870.1	379.858	396.127	263.989	495.92	810.296	346.348	437.386	CR9 protein
Csa1M617370.1	379.22	383.814	162.086	151.07	276.664	226.26	244.536	Aminotransferase 1
Csa4M608160.1	378.72	1313.02	635.132	310.116	572.194	457.65	339.523	4-hydroxyphenylpyruvate dioxygenase
Csa6M169340.1	377.695	356.654	263.114	200.205	252.701	303.518	352.371	Citrate synthase, glyoxysomal
Csa2M009490.1	377.6	366.688	92.1975	94.6567	157.833	70.3053	148.585	CBL-interacting serine/threonine-protein kinase
Csa4M056830.1	376.038	382.284	189.594	138.822	173.309	251.685	141.371	Gamma aminobutyrate transaminase isoform1
Csa2M295430.1	375.596	332.14	0	0	0	36.1599	0	PQ-loop repeat family protein / transmembrane family protein
Csa6M212860.1	375.239	375.39	218.671	315.173	324.133	296.853	286.056	Kinase
Csa2M377970.1	375.192	374.786	149.534	178.384	212.179	129.873	98.2565	KID-containing protein
Csa4M052730.1	375.17	389.371	437.434	542.685	536.922	643.881	729.201	Gda-1
Csa5M346550.1	374.933	392.609	289.537	244.562	389.344	438.92	363.885	Isocitrate dehydrogenase [NADP]
Csa3M389850.1	374.84	331.495	13.4073	0	0	4.49699	0	AP2/ERF domain-containing transcription factor
CsaUNM024770.1	374.108	334.08	462.842	68.5	149.008	101.756	143.183	S-adenosylmethionine synthase 1
Csa3M732680.1	373.75	370.593	409.455	276.277	181.847	126.91	193.569	NtEIG-E80 protein
Csa7M452230.1	371.868	326.737	16.969	14.0982	7.64	460.48	142.589	Cryptdin protein
Csa6M018590.1	371.25	357.219	0	0	0	0	0	NtEIG-A1 protein
Csa6M511710.1	370.92	1207.72	24.5263	30.6925	19.8834	814.593	82.3472	Gene of unknown function
Csa5M598080.1	370.768	368.13	188.498	428.626	184.606	225.582	343.472	N-acetylglucosaminyltransferase III
Csa5M174640.1	369.705	367.776	142.391	136.042	125.847	197.222	65.2859	Fibrillarin 2
Csa6M383520.1	367.288	373.478	583.021	276.455	491.693	307.182	215.405	Protein disulfide-isomerase
Csa2M059750.1	365.766	353.265	372.058	337.653	258.357	314.002	147.686	40S ribosomal protein S8
Csa4M642460.1	365.616	345.533	79.28	258.985	123.918	144.925	517.905	Zinc-finger protein 1
Csa2M003610.1	364.791	369.444	165.729	132.529	179.42	190.44	158.918	3-hydroxyacyl-CoA dehyrogenase
Csa4M022210.1	360.374	69.5813	101.189	168.371	153.221	74.1571	117.16	Gene of unknown function
Csa2M415550.1	359.259	368.783	64.8467	120.587	100.317	164.429	150.658	GTP-binding protein
Csa1M002900.1	359.254	367.928	116.546	81.0693	223.866	202.87	95.5421	Hydrolase, hydrolyzing -glycosyl compounds
Csa3M402970.1	358.884	377.879	19.6205	71.9388	31.8885	114.502	76.931	Beta-glucosidase
Csa5M512930.1	358.797	345.065	918.354	123.308	399.506	456.821	466.954	Heat shock protein 70
Csa3M076000.1	357.681	382.434	4.90852	0	4.67266	19.8073	24.7354	Lactoylglutathione lyase
Csa1M033160.1	356.68	358.722	427.144	494.766	394.944	329.099	291.86	Glutathione s-transferase
Csa5M317890.1	355.301	347.327	525.525	156.62	334.395	324.181	421.988	AMP dependent ligase
Csa1M051810.1	355.246	348.425	852.103	251.647	442.24	319.03	227.422	Calnexin
Csa7M387180.1	351.615	357.041	28.2832	42.9758	44.2667	207.379	115.254	Acetyl-CoA carboxylase
Csa6M501230.1	350.265	370.245	111.692	70.7578	168.697	199.239	104.437	Conserved gene of unknown function
Csa4M664500.1	349.333	354.444	291.389	273.004	243.556	324.416	197.346	Cinnamoyl-CoA reductase
Csa2M263950.1	347.719	330.122	450.17	228.731	279.774	278.149	227.013	Eif-1a
Csa2M350480.1	347.326	354.678	82.4171	207.953	116.643	254.375	123.371	Cdk10/11
Csa6M500640.1	347.034	326.609	172.06	467.053	271.417	327.823	908.618	L-ascorbate oxidase
Csa3M859630.1	345.088	354.675	30.5903	42.4285	38.2071	95.9427	29.8089	Pentatricopeptide repeat-containing protein
Csa4M334720.1	341.716	343.084	267.574	226.798	212.001	223.64	156.253	Ubiquitin-conjugating enzyme E2 28
Csa4M293860.1	340.377	357.318	327.575	196.761	285.787	265.42	333.36	Inorganic pyrophosphatase
Csa6M525670.1	340.327	322.667	626.854	545.577	687.329	389.921	1070.28	Reticuline oxidase
Csa2M264570.1	337.666	325.036	23.2869	26.5169	222.754	119.765	112.161	Chaperone protein dnaj 11
Csa4M001900.1	337.526	340.181	153.632	280.145	270.007	327.293	335.886	Epoxide hydrolase 2
Csa3M624050.1	333.566	337.435	119.468	152.16	126.587	217.29	110.062	Tfiif-alpha
Csa4M295480.1	332.947	335.925	130.811	188.982	137.01	208.98	91.9831	E3 ubiquitin-protein ligase XBAT31
Csa4M017210.1	332.935	33.5409	9.39046	8.51383	8.27397	7.93813	0	Gene of unknown function
Csa7M239630.1	332.098	314.468	97.7663	89.3997	116.103	292.352	126.497	Inosine-5'-monophosphate dehydrogenase
Csa2M000230.1	330.838	324.325	600.253	334.596	350.45	303.219	199.2	40S ribosomal protein S3
Csa2M021000.1	330.496	336.457	406.448	1178.61	3151.9	18327.5	34017.4	Kunitz-type protease inhibitor KPI-F4
Csa1M418240.1	330.13	345.448	87.0462	133.988	112.176	100.27	84.2413	3-ketoacyl-CoA synthase
Csa4M310720.1	329.559	335.816	48.1946	85.2408	84.7961	180.537	107.227	AMP deaminase
Csa4M081250.1	327.745	335.855	325.85	291.347	269.466	290.497	283.374	60S ribosomal protein L10
Csa6M404210.1	327.734	329.903	465.629	419.45	451.672	376.817	535.949	Hypersensitive-induced response protein
Csa4M110050.1	327.62	289.119	237.723	45.7693	163.177	63.7691	78.0543	Phosphate-induced protein
Csa5M609760.1	327.34	325.106	59.593	54.7287	173.871	97.7133	83.3486	Conserved gene of unknown function
Csa4M286940.1	327.024	340.317	38.9205	21.9339	52.8008	56.4595	35.875	Lipoxygenase 7, chloroplastic
Csa3M808360.1	326.823	319.018	341.826	187.936	221.07	222.89	128.234	Mega-6 fatty acid desaturase
Csa1M534750.1	326.793	299.405	1117.13	861.83	1181.34	1168.34	1990.63	Class IV chitinase
Csa3M876570.1	325.691	5.71147	0	6.51521	5.2114	8.48826	5.84547	Gene of unknown function
Csa2M404760.1	325.291	325.804	554.712	349.503	461.433	268.239	343.998	Ligopeptide transporter PT family
Csa4M631570.1	324.469	333.412	160.28	113.443	205.811	292.498	106.712	Alkaline alpha galactosidase I
Csa5M150390.1	323.813	324.041	180.7	190.084	243.364	264.111	264.634	Long-chain acyl-CoA synthetase 4
Csa3M822160.1	323.669	4.04567	0	5.60759	0	5.53092	0	Conserved gene of unknown function
Csa6M239680.1	323.478	242.821	516.13	304.095	349.171	1438.19	374.456	Conserved gene of unknown function
Csa5M025910.1	323.191	4.0389	5.09975	8.95013	5.12009	5.47425	8.06294	HSF domain class transcription factor
Csa3M872080.1	322.86	0	12.2014	12.0713	21.3562	0	5.59919	Conserved gene of unknown function
Csa1M537480.1	322.621	359.332	47.9796	271.079	491.924	2415.33	1792.03	Reticuline oxidase
Csa2M379360.1	321.598	273.235	131.587	60.6469	28.7402	53.1877	117.647	Conserved gene of unknown function
Csa3M035840.1	321.064	290.493	2147.96	1532.22	1248.84	610.442	780.384	Lipid binding protein
Csa6M014790.1	320.655	326.683	714.356	319.758	387.947	306.522	191.77	Ribosomal protein L3
Csa5M601490.1	320.6	331.197	674.296	390.763	391.937	333.753	386.013	ADP-ribosylation factor
Csa6M013350.1	320.117	295.64	353.845	311.223	602.129	240.024	240.195	Poly(A)-binding protein C-terminal interacting protein 6
Csa2M000400.1	319.349	310.435	260.39	138.955	174.705	174.943	119.644	Nucleosome/chromatin assembly factor group
Csa7M448810.1	317.896	292.608	201.165	46.2251	67.8311	46.7662	77.679	Salt responsive protein 1
Csa1M596520.1	317.878	328.191	325.46	483.977	459.037	507.75	884.955	Cysteine protease Cp1
Csa6M312580.1	316.796	314.987	148.215	234.585	180.425	307.805	190.592	Protein DEHYDRATIN-INDUCED 19 homolog 4
Csa3M135720.1	316.787	318.88	1233.24	926.603	1602.97	1529.49	2845.43	CmE8 protein
Csa5M649850.1	315.238	298.564	549.518	383.967	321.593	283.812	183.902	40S ribosomal protein S9
Csa4M307900.1	313.446	314.64	144.753	204.716	280.949	309.279	178.777	Mitochondrial uncoupling protein
Csa2M406760.1	313.421	316.615	155.002	243.462	259.057	487.609	356.133	Ribulose-phosphate 3-epimerase
Csa3M066750.1	313.175	314.886	515.846	344.574	583.597	402.581	599.4	Aspartic proteinase 1
Csa5M148810.1	312.612	10.6869	26.0811	18.2886	31.4167	19.8714	22.7885	Ribosomal protein S6 family protein
Csa1M063540.1	310.479	301.605	254.966	264.448	220.539	405.106	239.085	Nuclear acid binding protein
Csa7M184660.1	308.94	317.198	146.843	154.107	104.847	128.612	161.382	ERD1 protein, chloroplast
Csa2M009560.1	308.35	311.447	11.3034	22.7098	13.629	136.477	36.6635	L-allo-threonine aldolase
Csa5M606910.1	307.826	314.731	70.8382	121.319	147.979	175.064	183.561	Inositol or phosphatidylinositol kinase
Csa1M601520.1	307.262	301.848	326.854	187.387	303.663	271.023	217.44	EIN3
Csa7M448110.1	305.61	308.172	241.914	229.102	195.492	173.428	171.678	AP2 domain class transcription factor
Csa5M165210.1	305.446	304.978	312.24	146.721	291.866	236.272	257.709	Acyl-CoA oxidase
CsaUNM014640.1	305.237	318.564	82.098	80.2225	86.1858	109.517	107.62	Annexin
Csa4M638320.1	305.168	312.886	22.4283	140.084	297.634	545.138	496.668	Stem-specific protein tsjt1
Csa4M026900.1	301.41	1249.08	1768.71	1215.5	1037.02	1398.19	1298.62	Histone H3
Csa1M050240.3	301.312	296.556	1466.36	810.391	1011.19	552.587	783.914	Glyceraldehyde-3-phosphate dehydrogenase
Csa6M403620.1	301.016	310.866	30.0586	50.1328	43.7844	202.709	195.564	MRNA, clone: RTFL01-15-D07
Csa6M411290.1	300.761	297.966	155.773	214.334	158.94	178.476	113.988	Conserved gene of unknown function
Csa6M516640.1	300.448	294.943	169.928	180.463	173.194	209.194	152.502	Transcription regulator
Csa7M419610.1	299.652	270.775	368.93	60.8912	122.323	84.2742	115.583	S-adenosylmethionine synthase 1
Csa6M538800.1	299.636	313.445	75.5588	123.883	87.9477	257.245	110.727	Ctp synthase
Csa3M782680.1	298.54	291.71	109.679	250.201	184.622	99.6438	295.059	Syntaxin
Csa4M061840.1	298.158	306.843	155.45	158.076	159.662	126.985	118.691	Uro-adherence factor A
Csa6M365170.2	295.841	286.191	574.086	343.536	270.833	268.095	148.026	Ribosomal petrp
Csa3M126230.1	294.926	283.182	128.237	98.6518	109.366	128.512	89.7559	3-phosphoshikimate 1-carboxyvinyltransferase
Csa7M044260.3	294.257	308.911	276.279	333.4	250.29	294.34	241.73	Translation factor sui1
Csa7M396400.1	293.544	299.538	65.7983	126.9	105.828	205.304	109.278	AAA-type ATPase family protein
Csa5M027950.1	293.36	1396.83	244.697	120.885	130.235	1475	818.647	Inhibitor of trypsin and hageman factor
Csa5M608380.1	291.627	283.009	331.592	165.821	189.514	132.126	134.822	DNA-binding protein RAV1
Csa3M736840.1	290.015	293.565	386.726	373.253	290.773	336.476	156.049	40S ribosomal protein S23
Csa7M407520.1	289.953	294.95	429.434	242.211	330.269	185.097	175.476	Protein disulfide isomerase
Csa7M072780.1	289.911	257.611	10016.1	7617.38	9117.57	1720.96	4516.1	NtPRp27
Csa5M622530.1	287.121	277.106	1235.97	1167.52	1278.6	768.766	1479.11	Nodulin family protein
Csa3M645940.1	286.617	260.191	128.503	51.3676	104.834	29.8385	134.434	Salt responsive protein 1
Csa6M104650.1	285.755	300.084	0	0	4.43965	47.4751	0	Auxin-induced protein 5NG4
Csa2M055570.1	285.553	241.866	144.174	103.13	141.187	785.746	43.6231	RF107c
Csa5M199310.1	284.597	290.299	754.456	406.928	368.382	323.266	268.729	60S acidic ribosomal protein P0
Csa6M452080.1	283.999	241.808	294.377	107.138	175.03	90.2787	128.916	Transcription factor C2H2
Csa3M779010.1	283.881	244.169	426.674	323.813	337.23	308.529	1411.07	Syntaxin, plant
Csa1M537470.1	283.745	295.514	368.945	1244.19	1494.37	1300.85	2904.69	Reticuline oxidase
Csa3M124230.1	283.189	283.353	51.791	137.992	110.396	130.935	55.6027	F-box family protein
CsaUNM030420.1	282.702	217.471	486.508	274.874	335.764	1257.06	376.092	Conserved gene of unknown function
Csa7M043630.1	282.143	282.023	260.139	133.5	198.293	190.578	188.871	Aconitate hydratase, cytoplasmic
Csa2M360780.1	280.538	263.071	123.833	66.7977	39.5234	47.1491	174.837	Allene oxide synthase
Csa4M094000.1	277.644	263.37	399.731	130.929	219.166	106.608	251.908	UDP-glucose dehydrogenase
Csa4M025200.1	277.452	276.745	482.411	289.672	281.339	195.516	144.936	60S ribosomal protein L13
Csa4M354130.1	277.042	235.527	329.35	92.5075	138.793	112.909	87.5226	S-adenosylmethionine-dependent methyltransferase
Csa1M707620.1	276.568	268.39	245.385	379.266	237.918	272.446	208.034	Vesicle-associated membrane protein
Csa2M277000.1	276.452	258.793	223.129	338.03	243.865	265.549	140.676	Conserved gene of unknown function
Csa5M642720.1	276.32	289.253	206.136	134.304	174.824	189.219	134.546	6-phosphogluconate dehydrogenase, decarboxylating
Csa3M780520.1	275.917	216.091	162.263	102.784	61.1166	210.587	95.2307	Gene of unknown function
Csa3M851770.1	275.832	286.431	113.219	127.79	108.924	190.16	114.338	ADP-ribosylation factor GTPase-activating protein AGD5
Csa7M352410.1	275.357	270.99	178.532	270.554	306.211	132.499	148.983	MRNA, clone: RTFL01-13-K15
Csa1M479610.1	274.908	277.676	1260.06	488.915	825.902	530.524	556.18	Cytosolic ascorbate peroxidase
Csa1M601530.1	272.806	275.511	229.16	250.286	243.118	310.445	253.604	Serine-threonine protein kinase, plant-type
Csa3M740220.1	272.345	252.811	28.545	107.524	45.1875	145.123	74.0756	Heavy-metal-associated domain-containing protein
Csa1M000020.1	270.004	262.064	242.477	182.452	239.924	200.264	159.716	Short-chain dehydrogenase/reductase
Csa5M602180.1	269.451	279.113	85.9444	106.611	160.569	122.774	122.685	Trehalose-6-phosphate synthase
Csa1M005560.1	269.012	270.876	40.9388	80.0109	119.907	78.7713	71.3329	Trehalose-6-phosphate synthase
Csa6M502020.1	268.396	267.033	91.7463	82.7696	73.6445	76.1922	53.0669	G-box-binding factor
Csa1M229500.1	267.96	248.216	578.523	482.255	713.924	305.084	265.019	Hydrolase, hydrolyzing -glycosyl compounds
Csa6M452060.1	267.675	273.524	32.5485	46.1517	60.9705	106.153	70.0358	Inosine-uridine preferring nucleoside hydrolase
Csa1M126040.1	267.555	318.99	419.334	773.788	538.167	427.361	546.119	Gene of unknown function
Csa6M505950.1	267.21	1171.8	1100.38	636.942	722.005	944.977	708.411	DnaJ
Csa6M237600.1	266.591	241.212	28.0951	36.6551	98.0852	122.195	123.645	Basic 7S globulin 2 small subunit
Csa3M081930.1	263.936	256.853	601.338	405.721	459.799	473.588	340.53	Minor allergen Alt a
Csa4M443640.1	263.031	271.79	97.6477	122.506	116.939	263.382	160.075	Cleft lip and palate transmembrane protein
Csa1M004960.2	262.413	272.629	61.0569	105.696	82.0198	132.596	99.7483	Kinesin light chain
Csa6M350370.1	261.758	264.037	0	0	0	0	0	ATP binding protein
Csa4M166960.1	261.708	244.816	544.237	241.692	287.527	253.386	174.689	40S ribosomal protein s2
Csa1M414240.1	261.597	268.526	128.798	168.057	105.753	187.505	134.346	Soul heme-binding family protein
Csa6M499720.1	261.309	257.473	424.868	545.341	253.621	344.05	184.678	HD domain class transcription factor
Csa1M613540.1	260.804	270.822	40.5423	80.8812	55.1408	132.469	67.4223	Xanthine dehydrogenase
Csa5M466870.1	260.767	263.825	1223.9	571.816	438.673	390.697	304.365	40S ribosomal protein S27
Csa1M195220.1	258.977	253.871	277.447	291.641	238.476	240.717	213.646	Brain protein
Csa3M002290.1	258.815	265.261	387.481	364.013	269.312	277.705	250.472	High mobility group protein
Csa2M357860.1	258.649	255.746	646.767	650.854	359.559	132.99	196.253	EF hand family protein
Csa3M731210.1	257.613	222.202	218.365	45.2123	83.8091	107.078	124.465	Pyridoxal biosynthesis protein
Csa3M129540.1	257.151	268.11	452.833	360.329	258.355	255.578	158.649	Protein synthesis initiation factor
Csa1M569310.1	257.017	274.287	77.638	45.2595	33.8831	43.935	19.1533	Translationally controlled tumor protein
Csa2M033940.2	256.125	255.342	608.969	189.887	489.349	201.295	152.327	Calreticulin
Csa3M141900.1	255.85	1316.47	5.10713	14.4182	4.52932	300.892	45.1218	Type I proteinase inhibitor
Csa6M006790.1	255.416	240.754	77.7483	80.8178	67.8353	151.958	75.6168	Heavy-metal-associated domain-containing protein
Csa6M507250.1	255.324	222.617	629.439	393.807	790.64	749.554	716.646	Aspartic proteinase nepenthesin-1
Csa1M600980.1	254.869	262.857	561.468	293.839	272.675	257.302	160.433	Ribosomal protein L30e
Csa5M348050.1	254.598	255.536	341.696	228.088	276.88	167.079	175.756	Glutamate decarboxylase
Csa2M406060.1	253.572	261.529	78.2091	181.731	135.902	188.939	151.244	WRKY transcription factor
Csa2M185730.1	252.999	243.727	302.355	266.848	227.008	208.689	89.7766	Nicotiana tabacum RF
Csa1M212840.1	252.469	242.859	258.079	156.347	223.052	310.141	300.626	Proton-translocating inorganic pyrophosphatase
Csa1M145930.1	252.068	246.037	184.746	175.197	151.737	203.704	103.806	Eukaryotic translation initiation factor 2 subunit beta
Csa3M812150.1	251.994	250.609	199.034	136.738	157.192	194.431	153.062	Sec61 transport protein
Csa6M421630.1	251.609	238.179	100.209	12.6939	65.2408	45.3865	21.8814	ACC oxidase
Csa7M073560.1	251.166	227.046	530.836	300.459	255.167	282.768	219.891	40S ribosomal protein S16
Csa6M507310.1	249.698	249.198	151.499	119.588	134.292	217.915	214.998	Aconitate hydratase, cytoplasmic
Csa3M654480.1	249.262	250.622	192.129	213.461	163.769	265.064	136.526	DH
Csa1M038360.1	248.402	240.428	160.532	199.637	261.022	183.057	151.985	Ribulose-phosphate 3-epimerase, chloroplastic
Csa5M645120.1	248.308	244.768	425.885	288.016	284.502	223.916	177.657	60S ribosomal protein L10
Csa1M502360.1	248.194	244.994	149.254	89.1895	182.027	162.462	157.057	ATP-dependent clp protease
Csa2M372150.1	248.051	241.954	528.868	235.238	244.413	278.498	305.111	14-3-3f protein
Csa6M495050.1	247.912	251.456	88.8271	120.576	87.794	106.118	86.5687	Casein kinase II, alpha chain
Csa2M353480.1	247.417	240.45	36.3813	67.7974	57.2645	78.3327	22.8834	Squalene epoxidase
Csa3M836500.1	247.12	1260.99	172.621	82.6316	165.859	424.049	166.883	Formate dehydrogenase
Csa7M037600.2	247.045	205.152	32.1617	13.2605	71.0041	84.9668	44.5622	Cell wall glycine-rich protein
Csa3M019390.1	246.879	246.415	150.784	197.941	164.188	208.117	159.827	MYB transcription factor MYB93
Csa5M603390.1	245.944	239.339	123.392	96.124	133.205	134.589	141.462	MRNA, clone: RTFL01-05-M08
Csa7M184670.1	245.758	236.398	93.1783	61.7017	77.5575	102.075	136.596	Gene of unknown function
Csa2M361590.1	244.876	252.365	149.642	151.383	176.492	136.864	106.132	2-hydroxyacid dehydrogenase
Csa4M194780.1	244.463	234.384	12.9271	27.5045	81.3211	84.8545	107.401	Spotted leaf protein
Csa7M062820.1	244.211	237.745	107.242	148.894	105.437	197.046	90.0247	Arginine/serine-rich splicing factor
Csa1M042360.1	243.838	243.232	266.471	231.667	194.276	203.112	98.1608	40S ribosomal protein S7
Csa3M009510.1	243.137	247.441	227.807	255.238	238.713	206.516	172.086	Zinc-binding protein
Csa4M000870.1	242.705	253.53	164.843	143.832	183.565	238.122	223.788	Prephenate aminotransferase
Csa6M497060.1	242.427	228.153	238.996	144.046	265.141	128.624	124.127	Malate dehydrogenase, glyoxysomal
Csa6M190390.1	241.847	245.651	68.1686	239.932	144.762	125.561	131.316	Protein kinase 1b
Csa2M097440.1	241.422	245.712	309.986	337.051	262.875	299.34	265.753	Translation initiation factor
Csa2M000890.1	241.291	220.364	110.262	119.221	78.0491	147.856	73.1951	Mitochondrial import inner membrane translocase subunit Tim17
Csa7M308910.1	240.873	244.718	473.468	552.651	357.499	202.628	142.531	Neutral/alkaline invertase
Csa1M481220.2	240.751	252.009	318.288	340.637	272.295	226.581	133.916	Wrp15a
Csa6M051520.1	240.697	247.372	178.125	163.063	184.403	213.28	145.223	EIN3
Csa7M432520.1	240.29	1044.19	1008.42	710.128	1493.22	989.264	2095.77	Early nodulin 16
Csa6M140810.1	239.61	227.528	95.0403	158.623	101.673	144.253	157.2	Ubiquitin-protein ligase
Csa7M407550.1	239.364	241.121	47.3649	73.9578	145.079	110.101	333.337	Triacylglycerol lipase
Csa4M083570.1	239.205	232.857	213.141	103.172	149.822	179.819	153.201	Sec61 transport protein
Csa3M792070.1	238.996	198.493	60.3638	61.2468	226.633	45.525	46.3476	Protein AFR
Csa6M491710.1	237.915	233.795	86.2219	147.61	47.8892	33.8235	41.1691	ABC transporter family protein
Csa3M145760.1	237.793	240.984	224.139	141.397	222.908	283.495	170.219	Stem-specific protein TSJT1
Csa3M734920.1	237.783	247.061	193.99	314.71	204.926	232.662	187.69	BRI1-KD interacting protein 130
Csa1M045490.1	237.035	242.022	80.4303	114.026	94.6348	147.423	86.8017	1-pyrroline-5-carboxylate dehydrogenase
Csa1M038320.1	236.587	253.846	35.7857	45.7869	156.551	107.616	101.036	Thioredoxin II
Csa5M158550.1	236.465	255.735	300.833	243.184	238.511	213.452	131.439	Cytoplasmic ribosomal protein S13
Csa2M252070.1	236.379	231.119	63.3173	38.4155	45.7404	84.5333	23.7173	Amidophosphoribosyltransferase
Csa3M880040.1	236.107	230.4	221.492	226.359	161.831	337.875	118.234	Gene of unknown function
Csa6M045180.1	235.814	238.727	312.935	348.658	247.081	377.907	183.647	40S ribosomal protein S25
Csa6M494960.1	235.686	236.454	195.194	181.597	126.485	212.59	143.521	Conserved gene of unknown function
Csa7M449460.1	234.659	230.703	91.5095	93.792	110.68	68.8504	187.689	RSH2
Csa3M435530.1	234.55	256.018	59.3855	111.571	328.749	145.072	333.471	Conserved gene of unknown function
Csa1M164660.1	233.784	249.691	66.4554	60.5815	42.9329	39.8337	78.4364	Glucan endo-1,3-beta-glucosidase
Csa2M346050.1	233.711	223.623	338.753	215.004	253.045	287.967	279.362	Skp1
Csa7M450730.1	233.295	238.976	175.619	283.758	201.665	163.578	122.251	Phospholipid-transporting ATPase
Csa2M409500.1	232.899	202.43	123.049	98.9775	78.8294	68.4832	270.867	Gene of unknown function
Csa1M479630.1	232.868	247.835	122.527	379.377	271.583	155.364	392.072	N3-stress-induced mitogen activated protein kinase
Csa2M193310.1	231.193	225.17	397.239	263.16	222.194	200.78	127.99	40S ribosomal protein S15
Csa5M155590.1	229.509	230.804	141.955	182.947	142.169	176.551	179.489	Adenosine 3'-phospho 5'-phosphosulfate transporter
Csa1M002060.1	229.434	223.688	100.796	84.4658	182.591	96.5929	90.7386	AMP-activated protein kinase, gamma regulatory subunit
Csa6M185840.1	228.498	215.522	106.32	130.818	99.6374	147.878	172.813	Hydrolase, acting on ester bonds
Csa5M158540.2	228.174	204.709	39.6893	50.6165	125.034	77.4084	121.03	Conserved gene of unknown function
Csa4M003620.1	227.925	214.563	217.805	629.075	202.711	225.795	694.111	Adenine nucleotide alpha hydrolase domain-containing universal stress protein
Csa5M139920.1	227.875	232.64	496.863	327.116	287.383	224.629	155.209	60S ribosomal protein l9
Csa1M031880.1	227.499	236.483	177.285	150.209	119.855	104.308	82.5448	Pentatricopeptide repeat-containing protein
Csa6M484600.1	227.077	219	201.908	137.25	139.843	182.117	75.3934	Actin 1
Csa3M563280.1	226.927	232.915	177.554	191.779	124.609	164.771	119.892	Ubiquitin family protein
Csa7M419560.1	226.596	211.544	0	0	0	0	0	Cationic peroxidase 1
Csa1M569400.1	225.79	1110.48	86.0203	207.912	205.172	619.296	57.8406	Drm3
Csa3M563300.1	225.544	233.197	330.624	328.342	258.607	217.014	137.082	60S ribosomal protein L7a
Csa2M351820.1	225.177	233.468	223.517	349.628	322.836	311.011	359.119	Vacuolar processing enzyme a
Csa3M731060.2	224.863	230.353	79.5042	61.5025	81.5141	123.819	106.31	Acyl-CoA oxidase 4
Csa1M009690.1	223.004	228.47	297.327	334.48	214.263	232.133	135.631	60S ribosomal protein L34
Csa2M123620.1	222.994	231.425	349.49	180.188	280.755	280.655	236.433	GDP dissociation inhibitor 1
Csa3M727990.1	222.512	201.41	1112.42	610.751	530.058	340.983	378.095	WRKY protein
Csa3M589590.1	222.357	228.938	420.316	423.065	230.515	428.345	343.793	Amino acid transporter
Csa2M174150.1	222.328	228.077	731.997	365.242	503.831	342.552	285.385	Malate dehydrogenase
Csa5M149880.1	222.228	225.925	26.8259	40.603	37.8635	109.922	31.3341	Alpha,alpha-trehalase
Csa5M593440.1	220.914	236.421	129.161	214.34	190.826	70.2615	158.171	Cytochrome P450
Csa2M338890.1	220.804	190.041	313.132	201.53	200.187	163.756	132.349	60S ribosomal protein L34
Csa6M381850.1	220.652	213.364	103.562	143.588	111.607	90.3341	167.927	Amino acid transporter
Csa3M845500.1	220.427	223.426	47.464	217.674	96.004	91.213	295.335	Respiratory burst oxidase
Csa5M139270.1	220.289	208.453	20.0658	32.7761	36.1991	79.1547	83.0747	ATP binding protein
Csa5M140450.1	220.159	239.585	372.344	515.726	295.779	410.134	415.822	Metal ion binding protein
Csa1M422480.1	219.892	211.863	245.143	48.4372	224.171	76.225	28.1187	Xyloglucan endotransglucosylase/hydrolase 2
Csa5M589390.1	219.154	199.606	111.704	81.1342	469.995	85.6587	130.556	Light-harvesting complex I protein Lhca2
Csa5M610450.1	218.867	211.169	101.321	107.146	97.8042	263.547	224.04	ATP binding protein
Csa4M192080.1	218.855	227.099	187.128	265.705	141.6	168.312	108.759	Conserved gene of unknown function
Csa7M428940.1	218.733	214.498	237.279	228.31	165.877	181.506	102.544	60S ribosomal protein L6
Csa3M797610.1	218.536	201.059	540.196	267.451	231.496	198.067	143.217	60S ribosomal protein L21
Csa5M606310.1	218.423	228.725	120.504	158.474	199.211	85.2313	181.945	NAC domain-containing protein
Csa5M517130.1	217.812	220.04	48.5453	113.91	220.302	126.042	338.51	Plant-specific domain TIGR01615 family protein
Csa3M122360.1	217.791	220.348	91.6988	112.839	89.809	143.625	72.9558	Transcription initiation factor ia
Csa1M305760.1	217.629	220.453	123.861	189.433	123.366	187.73	121.428	Acyl-protein thioesterase
Csa6M193620.1	217.11	200.796	332.097	292.738	184.445	200.212	140.627	Histone H2B
Csa3M523580.1	216.793	216.089	80.5048	139.2	80.232	92.405	73.9843	NAC domain protein
Csa3M099630.1	216.485	231.018	157.693	100.217	119.004	118.852	62.0455	Uncharacterized Cys-rich domain
Csa3M114500.1	216.207	214.763	10.3062	5.42359	7.24566	4.39326	0	BRASSINSTERID INSENSITIVE 1-associated receptor kinase 1
Csa3M902190.1	215.684	227.841	196.643	253.908	247.149	164.54	155.335	Zinc-binding protein
Csa4M052600.1	215.401	201.323	195.457	219.999	146.497	180.269	137.692	Ubiquitin carrier protein
Csa2M055050.1	215.355	218.857	40.6578	67.186	80.4067	230.028	105.065	(R)-mandelonitrile lyase 1
Csa3M889160.1	214.638	209.05	274.158	182.63	258.337	241.185	299.339	Aspartate aminotransferase
Csa2M238250.1	214.049	207.408	233.854	200.361	256.534	268.126	249.276	CR413-PM1
Csa6M046270.1	213.249	206.979	502.397	255.887	271.298	211.635	143.941	40S ribosomal protein S17
Csa6M476730.1	212.82	226.948	146.541	202.485	134.712	224.642	104.912	TGF-beta-inducible nuclear protein
Csa5M608610.1	212.805	176.535	198.29	164.142	190.883	92.8359	300.328	Conserved gene of unknown function
Csa5M616390.1	212.732	221.205	82.5177	194.067	121.469	130.011	121.241	Transferase, transferring glycosyl groups
Csa6M045110.1	212.696	204.25	45.8578	80.0722	56.9116	105.132	97.5081	Amino acid binding protein
Csa6M004600.1	212.56	220.781	46.7808	46.5707	92.4737	62.8525	47.7177	Cysteine synthase
Csa3M848120.1	211.643	212.132	196.448	129.807	147.986	181.949	110.716	Helicase
Csa6M124220.1	211.492	207.588	197.749	116.116	142.417	140.023	130.684	Caspase
Csa6M526280.1	211.23	215.659	372.588	249.188	279.24	270.65	297.79	UDP-glucose 4-epimerase
Csa1M145980.1	211.211	174.287	81.4185	147.725	61.6987	91.4187	190.464	Arogenate/prephenate dehydratase
Csa1M000600.1	211.201	213.436	282.225	221.336	303.763	186.929	266.177	ATP-dependent clp protease
Csa6M115630.1	211.013	206.206	160.624	183.221	212.444	276.985	229.401	PDF1-interacting protein 2
Csa2M237740.1	210.83	1185.42	510.581	779.685	521.699	553.53	345.865	Conserved gene of unknown function
Csa6M061760.1	210.659	209.693	353.458	206.854	304.853	251.116	326.98	BI1
Csa7M290480.1	209.924	218.003	138.053	197.056	156.594	154.908	145.061	Conserved gene of unknown function
Csa5M215120.1	209.776	214.678	309.457	255.176	223.851	225.744	124.005	40S ribosomal protein S4
Csa4M293050.1	209.443	212.913	137.151	234.024	172.213	174.167	147.617	Pseudo response regulator
Csa5M487700.1	209.409	224.713	0	0	0	5.92018	0	Gene of unknown function
Csa7M067350.1	209.252	215.477	54.7609	8.87909	59.4207	61.521	0	Phloem filament protein
Csa1M063550.1	209.105	208.524	179.198	177.263	150.292	280.64	171.445	DNA binding protein
Csa7M037590.1	209.086	175.573	36.7936	20.0204	70.0462	133.7	65.1755	Cell wall glycine-rich protein
Csa7M071430.1	209.051	214.35	307.937	288.328	269.383	204.327	254.879	ATP-dependent Clp protease proteolytic subunit
Csa4M036590.1	208.723	208.524	61.1003	60.0631	59.5939	108.326	34.386	Alanine-glyoxylate aminotransferase
Csa7M450700.1	208.517	179.34	115.7	100.6	68.4804	128.132	66.1669	Translocase of inner mitochondrial membrane TIM23
Csa3M748210.1	208.291	201.649	338.937	185.416	191.878	163.893	114.423	60S ribosomal protein L24
Csa1M598330.1	208.12	215.654	4.28514	5.78005	0	45.7297	40.0223	Aminoadipic semialdehyde synthase
Csa5M623530.1	207.637	206.366	28.6692	40.0466	49.2055	117.075	42.1381	Mitochondrial carrier protein
Csa1M420320.1	207.473	192.984	248.235	195.343	397.844	195.826	220.708	Zinc finger protein
Csa6M446470.1	206.973	190.101	398.468	628.97	435.894	392.174	488.932	Heavy metal-associated domain containing protein
Csa5M212590.1	206.501	215.37	330.605	237.894	217.294	212.633	124.067	40S ribosomal protein S4
Csa2M012120.1	206.463	187.93	267.432	236.146	177.447	140.04	85.5897	40S ribosomal protein S24
Csa4M653450.1	206.033	181.065	176.729	59.7793	88.7065	59.5608	77.0173	AMP dependent CoA ligase
Csa1M046840.1	205.884	194.475	367.257	232.094	174.517	211.182	118.307	60S ribosomal protein L27A
Csa1M042980.1	204.13	193.084	183.338	114.753	105.976	69.787	46.9351	Mitogen-activated protein kinase kinase
Csa4M064630.1	204.094	211.979	694.308	1184.26	1288.92	618.166	761.859	Glutathione S-transferase
Csa7M446710.1	203.851	201.493	357.251	128.542	247.243	158.254	129.7	Heat shock 70 kDa protein
Csa1M004940.1	203.483	202.44	113.744	152.805	158.397	235.876	203.703	Peroxisomal membrane protein PEX14
Csa7M127370.1	203.25	209.504	235.397	463.802	230.228	314.404	200.335	NI
Csa6M520460.1	201.937	212.77	81.7031	155.996	88.4613	132.915	75.3269	Global transcription factor group
Csa2M000600.1	201.898	207.757	359.03	286.146	236.061	237.021	127.343	60S ribosomal protein L31
Csa3M375730.1	201.894	192.994	69.9993	53.868	74.2013	100.982	61.0407	Adaptin ear-binding coat-associated protein
Csa7M433150.1	201.81	209.182	32.4	41.1031	64.4957	80.0776	59.1933	Lactoylglutathione lyase
Csa6M008750.1	201.803	195.35	114.646	96.997	95.9033	139.101	64.9958	GDP-D-mannose pyrophosphorylase
Csa2M301530.1	201.311	203.322	313.58	216.153	226.275	252.66	164.507	Actin 1
Csa3M055970.1	200.94	201.894	123.073	126.378	126.143	166.683	101.682	Pre-mRNA-splicing factor cwc15
Csa5M604380.1	200.189	209.784	229.524	215.698	188.588	260.569	225.261	Ubiquitin carrier protein
Csa6M289760.1	199.976	200.892	445.292	310.66	258.231	207.623	128.43	40S ribosomal protein S23
Csa4M003670.1	199.961	186.902	172.948	378.18	370.182	91.4601	309.898	Chloroplast protein 12
Csa3M872740.1	199.796	178.716	24.6246	59.0734	20.7673	38.9242	174.967	Allergen Pru du 2.04
Csa1M629060.1	199.707	220.484	190.454	306.413	161.753	212.776	186.167	Gene of unknown function
Csa3M017320.1	199.476	174.125	152.7	143.404	120.833	55.1883	127.918	Ethylene responsive transcription factor 1a
Csa2M033330.1	199.248	187.535	119.259	167.971	103.883	178.975	206.333	DnaJ
Csa4M022860.1	199.187	181.074	429.155	189.214	239.665	149.872	105.839	Ribosomal protein L15
Csa4M337910.1	198.797	200.928	32.3339	41.5826	32.1218	78.4713	59.7395	Alcohol dehydrogenase
Csa4M649590.1	198.576	206.49	167.455	242.873	157.095	171.409	139.552	Pentatricopeptide repeat-containing protein
Csa1M050560.1	198.544	190.496	507.456	131.044	147.264	141.286	134.381	Protein transport protein Sec61 subunit gamma
Csa6M525470.1	198.4	203.106	43.0872	72.3614	52.2708	99.4982	85.664	ARF-GAP protein
Csa4M290810.1	198.395	196.063	147.916	172.89	119.626	222.293	166.971	Stress-associated protein 5
Csa6M291910.1	197.948	206.943	28.7517	63.9653	45.466	161.977	84.1369	Acyl-CoA dehydrogenase
Csa5M206420.1	197.673	197.923	31.0041	12.9825	20.6141	20.0133	32.9974	Xidoreductase
Csa6M518040.1	197.477	182.723	124.686	161.906	78.3929	87.7269	316.925	Ethylene response factor 1
Csa1M448960.1	197.264	192.672	369.136	220.756	199.379	173.722	107.508	40S ribosomal protein S14
Csa7M433390.1	197.076	181.422	293.48	146.527	160.602	154.633	119.533	Histone H2A
Csa3M857030.1	196.824	190.458	5.28307	6.78159	0	4.0778	0	DNA binding protein
Csa4M049090.1	196.614	190.779	320.167	222.495	175.424	176.661	91.8986	40S ribosomal protein S10
Csa4M010950.1	196.502	184.906	146.951	128.883	120.408	107.468	107.055	Peroxisome biogenesis factor 13
Csa4M049610.1	196.081	204.174	5.03054	5.95643	4.4425	0	36.1971	1-aminocyclopropane-1-carboxylate synthase
Csa3M020030.1	195.345	199.655	106.217	90.2243	102.053	97.9018	54.2961	Peroxisomal biogenesis factor
Csa5M215130.1	195.166	201.812	910.642	433.713	536.16	521.587	485.455	Ferritin
Csa3M313200.1	193.715	157.297	268.581	132.819	174.79	270.797	260.158	Conserved gene of unknown function
Csa7M448900.1	193.662	196.022	56.8937	65.8697	83.812	218.541	144.244	Aldehyde dehydrogenase family 7 member A1
Csa1M024160.1	193.462	160.83	36.3374	25.0879	22.148	23.1618	30.0409	DNA binding protein
Csa2M369110.1	192.85	180.759	213.871	113.992	138.142	163.127	120.834	Histone H3
Csa1M597690.1	191.999	161.26	128.511	13.0883	47.5231	15.17	87.4204	Plastid jasmonates ZIM-domain protein
Csa2M324450.1	191.976	196.311	103.349	85.4364	97.9001	53.9294	114.881	ATP binding protein
Csa1M024860.1	191.872	192.589	606.232	732.132	904.502	354.528	562.763	Glutathione s-transferase
Csa5M628650.1	191.863	187.488	154.737	120.757	124.357	156.369	143.488	Jasmonate ZIM-domain protein 3
Csa2M035370.1	191.82	171.111	302.083	180.943	247.446	229.464	323.884	Germin 2
Csa6M518250.1	191.534	195.787	163.986	178.848	131.774	130.719	97.3707	28 kDa heat-and acid-stable phosphoprotein
Csa1M423210.1	190.972	195.154	68.9314	233.609	109.093	205.239	160.39	Nuclear coiled-coil protein
Csa3M304140.1	190.903	184.272	761.699	536.993	546.683	396.248	565.363	Glutamine synthetase
Csa6M398200.1	190.761	173.376	298.392	260.296	269.579	276.812	664.493	Conserved gene of unknown function
Csa1M062290.1	190.458	190.619	363.629	282.329	528.849	681.567	781.908	Aspartic proteinase
Csa4M279830.1	190.217	186.112	77.2181	140.803	109.483	117.14	61.4237	Exonuclease family protein
Csa6M190420.1	190.109	184.05	81.6106	76.4211	68.0224	105.494	56.5249	Nucleic acid binding protein
Csa1M707630.1	189.814	202.753	187.101	161.093	189.26	253.075	206.477	Vesicle-associated membrane protein
Csa7M066830.1	189.57	192.6	58.8347	60.5042	80.9094	187.538	139.12	Methylmalonate-semialdehyde dehydrogenase
Csa1M701990.2	189.353	198.41	175.192	127.79	131.839	121.322	74.5557	Glutathione transferase
Csa3M127210.1	189.064	196.287	350.108	243.401	213.357	190.723	120.698	60S ribosomal protein L11-1
Csa5M207940.1	189.006	180.602	119.319	402.55	169.574	163.689	559.558	C3HL domain class transcription factor
Csa3M150850.1	188.757	199.528	0	6.18189	0	28.9912	0	Sugar transporter ERD6-like 16
Csa5M608600.1	188.41	180.262	168.777	112.265	135.545	172.443	155.664	Uv excision repair protein rad23
Csa5M604160.1	188.041	178.307	128.897	80.7687	82.3414	151.983	80.8312	Conserved gene of unknown function
Csa7M419550.1	187.926	181.71	0	0	0	0	0	Cationic peroxidase 1
Csa6M523320.1	187.892	192.471	105.498	168.757	98.1829	190.665	152.59	Lupus la ribonucleoprotein
Csa3M706170.1	187.867	173.06	33.849	142.382	77.2403	75.7141	302.788	Conserved gene of unknown function
Csa4M025720.1	187.609	169.871	106.293	152.496	93.7599	137.201	230.917	Conserved gene of unknown function
Csa1M575160.1	187.556	183.886	204.287	226.006	161.68	225.333	177.197	Charged multivesicular body protein 4b
Csa6M109660.1	187.472	190.526	88.2684	93.8457	137.282	139.33	120.841	Autophagy 8
Csa1M568580.1	186.536	188.809	60.2252	120.825	77.1363	201.482	99.4716	Fiber protein Fb2
Csa2M006790.1	186.325	192.537	192.099	118.246	88.2225	149.283	53.5118	Ein3-binding f-box protein 4
Csa3M076020.1	186.17	1244.32	426.303	306.23	760.039	701.672	813.958	Glyoxalase I homolog 1
Csa4M628350.1	186.153	179.745	185.393	73.5574	154.469	100.711	137.412	Sodium/calcium exchanger family protein
Csa3M727960.1	185.861	174.029	176.803	107.06	129.712	97.1123	190.378	Calcium binding protein/cast
Csa3M236590.1	185.776	169.936	226.256	311.526	178.476	224.499	204.013	Transcription elongation factor
Csa1M065930.1	185.498	185.521	438.4	242.958	290.313	133.379	136.71	Receptor kinase homolog RK20-1
Csa4M011660.1	185.419	172.425	14.2297	30.1928	31.0707	66.7446	57.6647	Conserved gene of unknown function
Csa3M659030.1	185.344	181.642	209.986	128.78	163.7	122.299	124.575	Serine/threonine-protein kinase PBS1
Csa2M058660.1	185.274	188.508	25.1756	38.5176	33.4682	49.73	21.5376	Conserved gene of unknown function
Csa7M234160.1	184.972	182.201	125.484	97.1511	121.67	155.419	131.711	Protein FRIGIDA
Csa2M352420.1	184.948	163.454	37.003	31.9661	122.513	42.3909	93.4164	CCCH-type zinc finger protein CsSEF1
Csa1M168900.1	184.917	183.144	366.634	143.78	206.128	158.752	110.27	40S ribosomal protein S5
Csa6M516970.1	184.879	186.665	307.987	198.106	213.708	207.517	208.815	Secretory carrier membrane protein family protein
Csa6M135470.1	184.821	186.581	228.821	111.311	163.291	111.135	80.4589	Succinic semialdehyde dehydrogenase
Csa1M599450.1	184.447	181.519	301.154	134.539	276.123	164.018	131.063	Rubisco subunit binding-protein beta subunit, rubb
Csa7M388450.1	184.422	187.75	86.4735	121.484	122.724	104.499	79.7586	ATP binding protein
Csa6M495670.1	184.278	167.498	536.151	218.718	203.117	196.513	143.894	60S ribosomal protein L26
Csa6M382970.1	184.243	176.217	402.255	196.956	213.312	158.884	122.488	40S ribosomal protein S8
Csa6M487600.1	184.137	173.74	114.988	122.925	61.7684	123.689	111.227	Stress enhanced protein 2
Csa6M522810.1	184.083	174.163	286.01	174.669	188.974	164.129	108.786	60S ribosomal protein L18a
Csa4M007670.1	183.776	190.315	144.54	91.8198	158.511	250.794	210.371	Transaldolase
Csa4M001800.1	183.502	166.101	147.696	102.549	102.298	121.673	127.183	UDP-glucuronic acid decarboxylase 2
Csa1M462020.1	183.478	197.71	449.404	259.153	224.029	181.226	132.156	60S ribosomal protein L32
Csa6M486960.1	183.191	200.509	790.324	1016.27	493.81	586.12	405.103	WRKY transcription factor
Csa1M569240.1	182.677	177.513	29.124	13.2695	15.2443	16.9828	9.00383	Epoxide hydrolase
Csa1M657510.1	182.587	162.14	194.18	247.602	182.373	211.38	202.241	Transcription factor
Csa4M017190.1	182.555	177.549	63.1647	67.8863	33.9816	60.5676	29.7998	DNA binding protein
Csa3M645950.1	182.466	178.736	120.853	113.899	121.217	143.588	102.483	Nucleolysin tia-1
Csa3M444620.1	182.13	181.675	125.657	175.83	186.061	205.45	225.512	Malic enzyme
Csa7M396390.1	181.958	188.249	35.9765	47.4645	66.3864	128.894	79.5938	AAA-type ATPase family protein
Csa3M354490.1	181.882	192.307	119.821	219.622	125.785	156.543	83.8207	CAPIP1
Csa7M432480.1	181.66	171.844	2195.74	1090.41	2199.23	396.471	623.618	Stellacyanin
Csa1M031860.1	181.639	181.803	218.393	170.859	145.381	155.367	104.877	Nascent polypeptide-associated complex subunit beta
Csa5M146950.1	181.284	183.568	106.245	62.1747	153.296	47.755	27.7796	Granule-bound starch synthase 1, chloroplastic/amyloplastic
Csa4M285740.1	181.15	1138.29	1613.06	1093.23	666.175	625.581	163.424	Peroxidase 2
Csa2M338830.1	180.976	164.445	105.446	180.416	146	138.77	167.569	NAC transcription factor
Csa7M232530.1	180.552	178.748	261.958	138.903	146.938	164.429	79.3403	40S ribosomal protein S5
Csa1M002670.1	180.548	175.932	70.8726	107.729	33.578	115.206	104.34	Brain protein
Csa3M127140.1	180.531	195.128	250.355	215.596	189.724	245.815	254.411	Conserved gene of unknown function
Csa2M365650.1	180.284	166.443	352.175	210.889	238.695	166.017	180.112	Vacuolar H+-ATPase c subunit
Csa3M826650.1	180.283	170.066	113.479	65.1354	65.6528	69.8763	86.2648	Nod26
Csa6M515500.1	180.137	197.644	15.8911	51.6168	28.1218	64.0602	59.7694	ATP binding protein
Csa4M017040.1	179.979	175.956	71.689	77.4743	67.7681	92.6693	56.1152	Epsin N-terminal homology (ENTH) domain-containing protein
Csa6M197230.1	179.856	186.648	168.613	150.458	203.123	177.004	161.962	Cullin-1
Csa3M735030.1	179.642	178.109	92.7493	193.672	236.962	190.323	426.412	ATEX70H4
Csa2M310390.1	178.417	190.357	232.607	227.157	136.184	283.505	155.566	Eukaryotic translation initiation factor
Csa3M063660.1	178.254	169.767	107.343	130.552	92.8525	119.559	79.6604	Splicing factor
Csa6M016990.1	178.19	164.223	389.02	139.519	212.538	155.762	127.266	40S ribosomal protein SA
Csa3M146360.1	178.109	178.95	144.28	157.937	118.244	144.526	62.9352	40S ribosomal protein S3a
Csa1M012100.1	177.96	172.157	102.939	86.5569	63.2168	61.7988	51.3597	Synaptosomal associated protein
Csa2M032220.1	177.546	177.668	339.323	227.564	225.517	182.574	118.135	60S ribosomal protein L18
Csa3M889120.1	177.339	182.523	233.798	133.879	165.475	151.631	95.5083	Minor histocompatibility antigen H13
Csa2M049960.1	176.776	180.39	62.5436	84.2699	130.238	193.97	148.429	Xylose isomerase
Csa6M449310.1	176.343	165.057	377.177	174.999	216.68	137.908	124.794	60S ribosomal protein L24
Csa6M092010.1	176.312	190.391	194.412	329.832	217.478	305.338	243.455	NAC domain-containing protein
Csa5M612930.1	176.286	183.792	154.594	167.124	119.101	95.4002	100.701	Calcium-dependent calmodulin-independent protein kinase CDPK
Csa6M495830.1	176.178	176.289	0	0	6.75013	60.8194	40.365	Amino acid binding protein
Csa6M134340.1	176.158	181.453	261.607	200.326	243.448	226.128	225.124	CBS domain-containing protein CBSX3, mitochondrial
Csa4M179160.1	175.832	179.868	291.61	186.124	168.412	158.858	140.225	Bromodomain-containing protein
Csa4M618470.1	175.68	172.591	134.392	166.522	131.333	139.051	112.406	Cholinephosphate cytidylyltransferase
Csa5M579580.1	175.175	190.635	116.733	184.624	127.533	185.79	130.871	Serine/threonine-protein phosphatase
Csa2M035490.1	175.005	183.35	132.09	111.187	122.705	125.752	117.007	Cyclic nucleotide-gated ion channel
Csa3M008310.1	174.962	186.277	126.817	234.804	185.692	231.45	186.46	MRNA, clone: RTFL01-05-P02
Csa5M180850.1	174.707	181.804	260.109	197.878	167.452	156.565	98.5125	60S ribosomal protein L23a
Csa4M361820.1	174.345	160.783	138.109	131.897	100.355	136.109	229.316	NAC family transcription factor 5
Csa4M051490.1	174.158	166.032	514.122	408.566	449.347	561.971	666.53	Conserved gene of unknown function
Csa4M371570.1	174.145	170.231	149.179	88.3426	109.247	111.528	71.0851	Aminotransferase ybdL
Csa4M082400.1	174.031	186.246	245.925	243.338	215.693	217.675	202.564	Ubiquitin carrier protein
Csa2M382430.1	173.011	170.01	258.159	256.459	189.356	185.844	89.2953	40S ribosomal protein S11
Csa5M139160.1	172.777	167.363	202.022	142.248	124.912	138.561	97.2355	Cytochrome b5
Csa3M710230.1	172.771	180.643	28.4531	32.118	54.2356	39.0662	39.1661	Conserved gene of unknown function
Csa6M088070.1	172.698	171.436	553.008	258.901	238.091	160.801	137.727	60S ribosomal protein L23
Csa2M370580.1	172.653	141.715	22.3479	49.0327	27.9823	64.0755	48.1868	DNA binding protein
Csa1M587980.1	172.588	181.13	23.774	48.9442	88.3813	55.8519	50.1353	Beta-galactosidase
Csa1M641040.1	172.49	176.391	94.6063	147.144	132.309	221.77	162.438	ML domain protein
Csa4M269770.1	172.136	185.292	67.9145	91.7896	93.4009	80.1913	112.225	Serine/threonine-protein kinase NAK
Csa2M010420.1	171.668	172.357	312.395	236.161	289.026	321.449	408.239	Aldehyde dehydrogenase 1
Csa6M055370.1	171.507	154.151	448.853	208.595	220.138	161.28	139.343	40S ribosomal protein S18
Csa2M382460.1	171.189	165.217	142.659	108.167	110.275	126.011	109.306	Conserved gene of unknown function
Csa6M398210.1	171.142	162.305	584.004	570.854	651.506	754.596	1222.16	Conserved gene of unknown function
Csa1M014380.1	170.92	173.908	95.4489	195.4	125.06	215.946	126.586	Cell growth defect factor
Csa6M495760.1	170.856	174.272	23.7517	45.4693	23.3878	92.1506	69.3707	MRNA, clone: RTFL01-16-G24
Csa3M664590.1	170.809	172.04	103.033	131.344	129.489	137.318	187.656	Glycogen synthase kinase-3 beta
Csa2M138790.1	170.308	168.231	216.497	254.256	169.29	157.939	125.709	Conserved gene of unknown function
Csa7M267940.1	170.115	161.575	181.745	175.39	151.585	165.879	122	GTP-binding protein
Csa2M177210.1	170.079	154.532	95.2483	119.997	53.3728	47.5613	62.5622	AP2 domain class transcription factor
Csa2M173070.1	170.028	178.044	287.434	330.852	224.946	162.201	106.36	Csf-1 protein
Csa1M225410.1	170.008	173.163	86.9681	91.0612	99.7863	181.609	144.68	ATPAP26/PAP26
Csa7M049170.1	169.946	132.186	72.4393	99.7469	78.7438	91.5901	146.061	WRKY protein
Csa2M012710.1	169.87	177.974	104.279	132.416	91.9356	131.486	46.2326	MAR-binding protein
Csa6M361410.1	169.749	172.284	29.4186	26.2805	144.182	49.7232	76.4643	MTD1
Csa3M838660.1	169.584	163.128	60.6306	85.3819	81.5904	94.1846	66.8298	Dead box ATP-dependent RNA helicase
Csa4M082380.1	169.221	157.888	14.4709	5.47372	28.3036	218.289	27.3897	Epidermis-specific secreted glycoprotein EP1
Csa5M601560.1	169.155	176.396	253.298	185.691	239.711	166.987	188.503	Carbonic anhydrase
Csa2M033320.1	168.339	169.636	114.687	117.575	123.979	159.175	111.13	Importin alpha
Csa5M589350.1	168.107	155.885	84.4967	79.2599	85.6048	56.4617	48.3789	Plant-specific domain TIGR01627 family protein
Csa3M840450.1	167.664	166.94	73.2225	65.4336	104.974	91.6147	136.696	E3 ubiquitin-protein ligase RGLG1
Csa3M002880.1	167.531	171.523	91.6478	194.87	97.0641	217.224	110.185	Nut2
Csa3M910670.1	167.37	172.031	7.89991	5.84729	6.19443	34.5386	9.05238	Major pollen allergen ry s 1
Csa6M109670.1	167.286	163.562	90.3555	96.6966	84.6905	137.97	88.8882	Vesicle-associated membrane protein
Csa6M401340.1	167.022	158.481	614.33	263.587	599.545	98.6778	201.588	HSR203J protein
Csa3M182240.1	166.809	163.07	344.715	323.161	219.995	194.08	139.525	60S ribosomal protein L36
Csa4M415910.1	166.785	177.967	82.2496	88.2944	75.4951	111.819	68.5005	JHL06B08.6 protein
Csa7M390010.1	166.491	156.634	299.838	163.058	163.045	154.072	97.5515	40S ribosomal protein S19
Csa2M009390.1	166.467	172.683	66.8651	114.188	79.4402	143.728	74.0111	CIP73 protein
Csa6M091830.1	166.422	142.692	42.8944	108.943	56.5168	128.67	151.002	AP2 domain transcription factor RAP2
Csa6M087710.1	166.276	162.636	262.59	144.018	164.426	112.971	86.7386	Stress associated endoplasmic reticulum protein
Csa6M448100.1	166.176	174.47	20.1808	42.0187	46.9296	116.729	54.1003	Zinc finger protein
Csa2M070870.1	165.904	173.602	256.683	232.415	215.622	208.79	188.679	Serine/threonine/tyrosine kinase
Csa3M731160.1	165.845	166.657	0	0	0	0	0	Xidoreductase 2G-fe(II) oxygenase family protein
Csa3M850600.1	165.431	171.192	434.534	290.711	365.434	153.89	132.713	LRR receptor-like serine/threonine-protein kinase
Csa6M094720.1	165.385	170.365	116.203	160.526	93.7176	211.203	191.087	Sphingosine phosphate lyase
Csa1M042460.1	165.378	172.459	246.272	402.74	277.627	202.024	319.694	Calmodulin binding protein
Csa6M014520.1	165.314	150.668	398.956	155.154	173.214	166.413	108.537	Ribosomal protein S26
Csa4M031000.1	165.02	173.857	182.697	65.6241	121.566	41.0083	38.5407	Myo-inositol-1 phosphate synthase
Csa3M483790.1	164.986	167.304	337.78	284.322	190.74	176.581	89.0754	Ribosomal protein L37
Csa3M643770.1	164.943	161.208	396.718	228.974	319.211	109.041	98.6829	Flavonoid 3-hydroxylase
Csa3M566330.1	164.786	169.81	450.781	354.759	326.441	229.279	209.619	Alcohol dehydrogenases
Csa3M077610.1	164.464	158.461	328.017	246.477	187.542	179.565	200.187	Eukaryotic translation initiation factor SUI1
Csa2M005340.1	164.431	164.423	38.4631	89.2222	78.4456	115.969	126.238	DVL10
Csa3M132010.1	164.371	168.024	163.831	84.2761	122.96	141.283	116.7	Glutathione reductase
Csa2M059720.1	164.311	165.113	76.4149	83.0274	104.83	147.378	134.222	NADPH--cytochrome P450 reductase
Csa7M431410.1	164.259	163.778	172.664	115.903	154.403	160.978	172.166	Membrane protein PB1A10.07c
Csa6M445740.1	164.25	169.729	75.3669	200.665	98.7896	295.953	188.967	Phenylalanine ammonia-lyase
Csa4M665660.1	164.193	164.301	109.752	96.6277	107.852	133.959	89.7111	Conserved gene of unknown function
Csa6M486860.1	164.17	169.976	120.455	100.395	85.0777	92.4803	73.9082	Rganic anion transporter
Csa2M034770.1	163.709	164.344	84.7637	155.198	118.611	73.3279	21.6025	Protein NIM1-INTERACTING 3
Csa3M876590.1	163.655	165.758	102.692	168.925	109.665	208.34	122.943	Vesicle-associated membrane protein
Csa6M091930.1	163.54	156.385	144.907	49.5891	69.8849	27.2414	88.03	Protein TIFY 9
Csa4M011770.1	163.471	166.7	172.372	142.654	85.8502	152.473	154.11	NAC domain-containing protein
Csa7M387170.1	163.047	168.632	187.915	331.267	259.221	347.653	383.277	Protein kinase atmrk1
Csa7M075680.1	162.694	170.419	275.405	234.112	295.665	199.145	209.168	4-hydroxy-3-methylbut-2-enyl diphosphate reductase
Csa5M178720.1	162.692	175.128	390.659	275.465	228.36	160.181	121.671	60S ribosomal protein L35
Csa5M523190.1	162.655	148.392	405.391	309.313	302.469	122.153	269.656	Glutaredoxin
Csa4M172540.1	162.483	160.548	54.6103	147.956	118.048	63.8455	182.71	Calcium-dependent protein kinase
Csa3M044530.1	162.086	158.119	107.953	144.407	104.033	193.369	125.274	Embryo defective 1303 protein
Csa5M457760.1	162.013	157.549	301.371	183.175	159.609	149.332	116.248	Mitochondrial phosphate carrier protein
Csa3M809960.1	161.975	160.636	213.707	287.805	206.452	246.152	148.291	Protein translocase
Csa7M067490.1	161.764	161.328	112.929	89.3453	114.476	120.276	110.696	Glutamate-1-semialdehyde 21-aminomutase
Csa6M495100.1	161.227	156.058	20.7521	44.0477	122.931	84.2706	145.454	BTB/PZ and TAZ domain-containing protein 4
Csa4M295450.1	161.116	161.439	198.304	494.595	350.74	293.642	374.84	MRNA, clone: RTFL01-47-M12
Csa3M002890.1	160.927	153.122	90.3869	25.4549	27.2537	25.6623	26.1011	Cystathionine gamma-synthase
Csa2M348280.1	160.862	152.981	324.711	155.99	169.21	210.069	158.104	ADP-ribosylation factor, Arf family Arf1
Csa5M598720.1	160.386	159.132	26.075	31.7066	16.3714	57.6388	31.6973	Multidrug resistance pump
Csa4M663650.1	160.336	154.026	186.543	138.924	138.804	179.891	152.267	SnRK1-interacting protein 1
Csa5M289650.1	160.245	164.167	124.925	69.6651	96.3531	66.3243	86.6869	Conserved gene of unknown function
Csa3M778350.1	160.234	169.572	300.636	260.574	251.986	260.098	210.612	Ubiquitin-conjugating family protein
Csa6M185850.1	160.028	144.329	54.5687	57.5827	77.9105	113.96	118.888	Conserved gene of unknown function
Csa3M739040.1	159.981	142.744	247.444	188.15	147.933	163.168	105.963	60S ribosomal protein L12
Csa6M496990.1	159.768	144.303	124.248	242.245	119.203	136.38	165.671	Homeobox-leucine zipper protein
Csa5M517860.1	159.685	158.766	89.5656	107.183	92.6846	105.692	67.5632	Esterase/lipase/thioesterase
Csa6M136540.1	159.622	164.564	100.808	108.982	118.358	116.212	77.2795	Serine/threonine protein kinase
Csa3M731010.1	159.462	159.367	142.744	107.517	117.418	127.919	85.1991	Proliferation-associated 2g4
Csa3M016960.1	159.359	161.95	119.666	88.6874	85.3424	69.7328	68.4664	ATP-dependent protease La
Csa1M569250.1	159.295	153.047	332.22	168.834	164.179	124.847	94.3551	60S ribosomal protein L18
Csa7M073600.1	158.756	154.34	59.4272	89.141	112.442	228.848	208.297	Methylcrotonoyl-CoA carboxylase beta chain, mitochondrial
Csa4M000930.1	158.321	157.695	585.272	397.125	280.881	295.049	189.587	40S ribosomal protein S29
Csa7M432600.1	158.214	158.785	385.132	156.431	288.61	173.552	299.911	Phospholipase D
Csa4M639750.1	158.159	148.875	332.205	248.801	139.923	177.226	324.789	Calmodulin 4
Csa3M901000.1	158.013	166.125	113.413	159.726	116.746	153.79	112.847	MRNA, clone: RTFL01-05-P02
Csa7M432280.1	157.845	157.073	129.586	122.805	208.663	167.884	178.777	Glycerol kinase
Csa1M050360.1	157.79	1100.18	129.991	131.896	113.933	295.788	274.207	Malate synthase, glyoxysomal
Csa6M448740.1	157.641	165.843	0	0	0	0	0	Threonine dehydratase/deaminase
Csa3M859710.1	157.592	169.076	111.77	204.448	206.001	170.089	149.667	Glucose-1-phosphate adenylyltransferase
Csa6M152330.1	157.536	159.021	233.577	199.929	181.336	143.128	91.3688	Ribosomal protein
Csa6M512870.1	157.411	154.5	689.706	303.511	457.341	206.672	328.801	Chromoplast-specific carotenoid-associated protein, chromoplast
Csa2M372120.1	157.388	146.836	57.9606	114.481	69.7187	99.3798	83.2516	MADS box interactor
Csa7M419540.1	157.082	151.579	0	0	0	0	0	Cationic peroxidase 1
Csa3M835890.1	156.909	153.342	143.863	236.557	116.81	241.348	227.724	Homeodomain-leucine zipper protein HD3
Csa6M152960.1	156.901	158.393	154.76	134.822	129.369	141.47	130.182	Vacuolar protein sorting-associated protein VPS4
Csa3M184060.1	156.89	157.5	132.749	144.736	127.952	128.374	104.538	Heat shock protein binding protein
Csa1M126050.1	156.611	159.348	430.318	298.307	302.449	189.66	318.889	Ubiquitin family protein
Csa3M736750.1	156.35	156.112	311.716	156.208	178.928	158.908	106.416	60S ribosomal protein L4
Csa2M370390.1	156.228	150.451	576.322	248.19	263.621	166.083	246.241	P8MTCP1
Csa6M405290.1	156.163	161.556	139.907	115.066	128.165	120.278	96.1876	Chorismate synthase
Csa1M569380.2	156.135	164.777	364.123	219.21	222.612	154.294	112.241	60S ribosomal protein L22
Csa2M035420.1	155.874	159.88	74.5892	151.841	91.7492	132.974	69.3962	Ubiquitin carboxyl-terminal hydrolase
Csa1M050020.1	155.871	157.537	49.9474	50.1812	74.0919	75.0409	53.6471	MA3 domain-containing protein
Csa3M852470.1	155.828	150.098	106.048	105.41	137.5	85.5011	211.793	NAC domain-containing protein
Csa6M526290.1	155.618	156.819	199.36	137.226	142.451	157.469	105.07	Coatomer epsilon subunit
Csa5M139250.1	155.573	157.441	70.2567	122.351	139.252	190.671	161.344	Protein yippee
Csa2M035520.1	155.45	153.174	180.967	134.923	124.396	108.756	103.162	Signal recognition particle receptor alpha subunit
Csa3M149950.1	155.1	136.93	753.874	853.25	526.504	333.762	588.952	Aluminum-induced protein
Csa6M011710.1	154.581	158.75	152.104	127.846	159.348	123.966	114.049	Clathrin heavy chain
Csa4M010990.1	154.475	136.804	384.877	117.063	275.246	139.316	403.591	GRAM domain-containing protein
Csa5M002030.1	153.712	155.391	102.051	124.921	111.019	106.106	80.5646	Big map kinase/bmk
Csa2M049860.1	153.584	157.825	55.0406	77.8336	78.5708	104.394	61.0238	FGGY family of carbohydrate kinase
Csa1M705090.1	153.579	153.52	176.393	144.254	158.52	163.345	142.709	Guanine nucleotide regulatory protein
Csa4M637150.1	153.335	158.785	166.175	101.566	143.834	114.373	118.784	DNA double-strand break repair rad50 ATPase
Csa1M574830.1	152.741	140.617	123.869	101.922	78.586	98.1615	76.2442	Transcription regulator
Csa5M464790.1	152.646	133.018	253.184	126.941	149.405	133.174	123.264	Ubiquinol-cytochrome c reductase iron-sulfur subunit
Csa5M608390.1	152.5	135.787	102.264	104.087	174.375	115.1	174.009	Myb-like transcription factor
Csa6M450440.1	152.394	153.161	84.1867	145.258	234.773	114.472	118.969	Conserved gene of unknown function
Csa6M309980.1	152.389	138.281	4.58257	7.02725	43.8101	23.9465	15.4259	Periplasmic beta-glucosidase
Csa7M452000.1	152.199	151.519	208.652	137.682	151.663	184.333	166.895	Chmp1
Csa7M398150.1	152.142	143.236	219.664	159.094	131.762	126.192	67.3382	Ribosomal protein L19
Csa5M218780.1	151.963	151.899	17.2739	17.3181	34.4389	33.2295	40.6699	Amino acid transporter
Csa2M237150.1	151.458	136.539	26.8879	68.4931	55.2422	126.917	62.2348	Maternal effect embryo arrest 14 protein
Csa1M002130.1	151.415	143.614	56.9189	23.5321	43.3949	40.453	16.9562	Argininosuccinate synthase
Csa6M445750.1	151.019	155.944	85.9718	205.576	92.539	179.483	160.416	Phenylalanine ammonia-lyase
Csa2M380000.1	150.859	147.448	435.665	231.702	270.3	171.583	189.612	Ran
Csa3M849920.1	150.737	163.554	284.631	161.067	162.314	126.331	80.2887	Ribosomal protein L28
Csa3M639040.1	150.645	156.061	88.8908	86.6502	76.7384	97.3927	52.6923	DEAD-box RNA helicase
Csa6M421660.1	150.58	149.766	47.1388	74.7565	73.0673	113.102	98.3887	AP2 domain class transcription factor
Csa3M597350.1	150.573	147.121	109.046	143.623	84.0799	119.722	84.2852	TRANSPRT INHIBITR RESPNSE 1 protein
Csa3M127100.1	150.468	155.036	64.3941	78.9964	70.6627	88.1763	72.0416	Beta-hydroxyisobutyryl-CoA hydrolase 1
Csa2M428410.1	150.366	149.567	200.765	243.566	173.085	235.201	154.821	Ubiquitin carrier protein
Csa6M500490.1	150.352	150.111	150.873	150.13	123.259	145.469	104.236	BZIP transcription factor bZIP109
Csa5M162630.1	150.304	133.009	333.567	158.674	164.659	134.895	96.6282	Ribosomal protein L15
Csa1M048950.1	150.23	145.437	162.566	274.792	145.537	161.114	118.233	Afc
Csa3M589570.1	150.029	154.38	107.09	117.881	101.077	108.922	73.2027	Bromodomain-containing protein
CsaUNM030430.1	149.93	1117	4460.19	1232.05	2826.09	5000.84	3230.06	Conserved gene of unknown function
Csa4M308490.1	149.842	124.202	4.21089	0	0	7.84629	0	Anthocyanin 5-aromatic acyltransferase
Csa5M598700.1	149.631	137.072	57.4942	58.1923	31.0838	50.426	72.7542	MRNA, clone: RTFL01-04-G16
Csa3M824890.1	149.031	129.118	538.984	172.778	252.035	159.854	288.128	Pro-resilin
Csa7M282410.1	148.838	136.815	155.376	96.6016	100.862	112.773	59.0876	40S ribosomal protein S4
Csa1M422430.1	148.799	149.223	130.053	133.86	130.541	128.557	115.683	Calmodulin-binding protein
Csa7M398110.1	148.707	165.602	174.711	174.495	127.879	174.992	111.407	Conserved gene of unknown function
Csa6M509550.1	148.152	151.782	235.297	102.297	144.207	107.022	90.5377	Isocitrate dehydrogenase
Csa4M006320.1	148.065	145.129	66.9539	75.5335	82.2774	121.496	80.785	WD-repeat protein
Csa6M399220.1	147.792	145.094	551.298	799.308	856.074	821.726	1661.99	Conserved gene of unknown function
Csa2M348250.1	147.729	157.663	181.828	176.504	142.712	144.935	124.545	Replication factor A1
Csa6M338110.1	147.602	145.452	2557.73	2035.36	2225.89	514.609	299.305	Conserved gene of unknown function
Csa5M156180.1	147.181	147.137	108.235	116.47	79.0532	168.737	201.576	Staygreen protein
Csa6M147600.1	147.006	142.075	113.145	75.5317	73.1132	95.2437	78.1938	ABC transporter family protein
Csa6M095330.1	146.995	157.913	83.7555	248.733	131.667	160.706	128.646	Histidine kinase 3
Csa1M420340.1	146.893	144.445	9.22012	0	0	0	6.52957	1-deoxy-D-xylulose-5-phosphate synthase
Csa2M418350.1	146.87	140.863	97.9666	121.516	86.315	106.303	71.4152	GmATG8d protein
Csa7M420790.1	146.647	154.422	278.167	297.683	229.735	265.859	416.544	Esterase
Csa4M001710.1	146.518	148.978	154.141	271.283	143.182	198.804	244.22	Multidrug resistance-associated protein 2, 6 (Mrp2, 6), abc-transoprter
Csa1M615160.1	146.455	142.184	85.8658	149.265	107.098	168.323	194.845	Poly(P)/ATP NAD kinase
Csa6M013880.1	146.399	146.047	222.331	135.21	201.932	141.882	158.524	Alpha-soluble NSF attachment protein
Csa6M187390.1	146.201	148.509	66.9941	52.1504	119.15	51.6314	75.434	Binding protein
Csa2M382490.1	145.762	142.89	78.8906	92.7065	69.4081	115.55	122.355	HD domain class transcription factor
Csa1M569290.1	145.455	141.505	348.363	64.6447	166.491	174.725	101.352	Heat shock protein 90
Csa1M073900.1	145.271	135.759	0	0	36.7726	31.4395	21.4988	Conserved gene of unknown function
Csa3M005580.1	145.17	150.611	165.199	297.616	152.555	190.35	199.547	Mak
Csa6M450370.1	144.918	149.699	582.648	283.792	311.085	233.479	198.796	Enolase
Csa4M642320.1	144.819	148.262	95.3016	129.343	98.9438	110.822	92.8229	Aspartic proteinase nepenthesin-1
Csa5M605110.1	144.575	141.062	134.199	155.626	109.294	149.139	118.421	Alpha-1,4-glucan-protein synthase (UDP-forming)
Csa2M061030.1	144.512	144.96	97.9098	80.2827	77.7604	62.4527	58.7033	Microtubule-associated protein
Csa3M874340.1	144.424	135.665	260.13	175.121	143.61	118.899	110.686	Alba DNA/RNA-binding protein
Csa2M298260.1	144.39	152.343	125.279	106.832	118.546	122.62	83.6891	26S proteasome subunit RPN5b
Csa7M047250.1	144.316	145.022	32.9297	57.8285	31.4043	87.8654	38.0326	Protein STRUBBELIG-RECEPTR FAMILY 3
Csa6M358660.1	144.051	143.397	76.2049	148.249	88.3538	147.218	81.3946	Receptor protein kinase
Csa3M567330.1	143.66	132.206	20.1148	60.0167	42.7789	68.5824	61.9958	WRKY protein
Csa5M409620.1	143.333	127.769	303.175	160.787	151.764	136.729	107.43	Ribosomal protein L30e
Csa2M296130.1	143.319	149.205	53.0101	60.7758	95.9543	77.7034	67.4765	Shikimate kinase
Csa5M505200.1	143.287	137.999	189.368	100.619	92.1264	102.532	53.8231	60S ribosomal protein L35
Csa3M002680.1	143.257	145.38	157.705	140.494	141.358	126.017	139.606	3-dehydroquinate synthase
Csa3M653460.1	142.927	142.524	159.792	92.7339	114.146	96.9382	62.3798	L. (clone na-481-5)
Csa4M637750.1	142.857	133.615	40.8899	26.8204	131.987	79.8033	105.861	Rnf5
Csa2M368880.1	142.538	144.892	592.146	136.992	402.409	192.344	83.7621	Endoplasmin
Csa7M062840.1	142.484	145.637	105.245	97.8346	114.072	118.104	101.409	Calmodulin-binding transcription activator 2
Csa3M736950.1	142.394	152.085	100.786	184.715	103.364	260.466	148.171	DNA-binding protein S1FA
Csa2M163170.1	142.102	131.137	441.695	369.641	281.003	252.721	311.722	Ammonium transporter
Csa6M319770.1	142.076	144.826	113.904	83.9399	122.262	153.076	146.673	Glyoxysomal fatty acid beta-oxidation multifunctional protein MFP-a
Csa7M407670.1	142.045	103.435	87.8648	121.617	119.18	195.38	100.583	Chloroplast protein 12
Csa5M571460.1	141.731	129.407	123.5	129.446	50.7395	100.176	47.9187	Ribose-5-phosphate isomerase
Csa6M521600.1	141.62	146.029	48.42	64.9561	73.1161	108.083	53.8639	SCP1-like small phosphatase 4b
Csa1M025020.1	141.478	133.127	1354.77	320.297	553.583	194.12	1209.08	Calcium binding protein
Csa2M009430.1	141.151	148.1	39.7899	60.7584	69.566	91.426	93.1455	Conserved gene of unknown function
Csa3M646010.1	141.138	126.016	106.489	162.544	197.318	72.2356	61.202	Auxin-repressed protein
Csa6M407650.1	141.081	131.347	136.494	226.638	133.023	204.765	126.038	Histone H1
Csa4M000580.1	141.042	133.151	507.917	136.234	183.872	114.038	58.6992	Tubulin alpha chain
Csa6M445170.1	141.004	130.761	240.58	144.447	109.876	127.892	81.2548	60S ribosomal protein L12
Csa6M513540.1	140.598	142.163	140.397	230.995	142.443	163.147	338.174	Gene of unknown function
Csa1M532320.1	140.518	145.501	186.648	173.054	122.492	135.073	87.1703	Ran-binding protein 1
Csa3M873780.1	140.409	132.526	68.8844	47.0434	61.051	89.4135	67.0937	JHL20J20.9 protein
Csa4M061860.1	140.276	134.137	276.788	163.151	156.512	128.165	95.7492	60S ribosomal protein L27
Csa1M045780.1	140.085	150.046	209.084	229.109	178.187	337.584	177.459	B12d
Csa3M117430.1	139.425	121.206	364.457	142.234	147.838	176.513	146.026	Protein transport protein Sec61 subunit beta
Csa7M071590.1	139.383	131.378	112.115	158.83	126.099	152.779	134.062	Seed maturation protein PM23
Csa5M171730.1	139.258	138.751	184.987	143.66	134.718	105.728	59.2485	60S ribosomal protein L7a
Csa4M361780.1	139.243	137.294	107.505	132.017	196.977	120.66	118.24	Amino acid carrier
Csa6M151730.1	139.24	123.152	245.806	150.261	124.359	115.801	68.3191	60S acidic ribosomal protein P2
Csa3M234000.1	139.222	134.866	105.523	132.153	95.0853	182.055	176.368	Peroxisomal 3-hydroxyacyl-CoA dehydrogenase
Csa3M135730.1	139.207	136.435	52.159	77.4527	98.9419	126.178	131.31	CmE8 protein
Csa7M429590.1	139.197	136.838	133.23	119.441	120.449	123.048	124.681	Citrate synthase
Csa4M003660.1	139.186	145.728	98.5479	97.2784	107.008	110.123	68.1599	BZIP transcription factor bZIP41
Csa2M277020.1	139.129	144.01	87.7822	142.292	93.2206	119.095	83.716	Splicing factor, arginine/serine-rich
Csa1M615170.1	139.039	131.271	322.34	124.131	145.191	112.349	82.4035	60S ribosomal protein L13a
Csa7M071350.1	138.626	149.233	72.9791	160.784	111.229	167.793	89.5993	ADP-ribosylation factor
Csa6M067970.1	138.274	134.468	333.374	105.939	134.489	91.0802	86.3058	Acyl carrier protein 1, chloroplastic
Csa1M532330.1	138.205	130.799	118.047	128.131	98.2842	130.583	57.9365	Ran-binding protein 1
Csa1M580200.1	138.056	155.343	391.308	166.782	196.672	137.463	106.614	60S ribosomal protein L31
Csa4M187320.1	138.018	141.168	61.8456	86.2779	61.3537	303.671	302.125	Cationic amino acid transporter
Csa6M382950.1	137.953	127.177	84.4712	84.2399	69.0037	67.7474	116.14	NAC family transcription factor 5
Csa1M523090.1	137.883	148.845	172.725	76.9238	108.374	82.229	77.9082	Xysterol-binding family protein
Csa2M381720.1	137.694	139.88	151.441	145.926	126.533	144.423	79.4131	JHL06P13.3 protein
Csa1M600250.1	137.681	136.67	83.4988	91.4787	80.2073	99.6747	97.9652	AKIN beta1
Csa5M426440.1	137.665	137.064	87.6671	86.2657	87.1509	101.036	85.7203	Endoplasmic reticulum vesicle transporter protein
Csa6M404280.1	137.61	129.236	204.512	107.742	119.815	98.576	92.4902	Pyruvate dehydrogenase alpha subunit
Csa5M602150.1	137.577	138.419	88.0653	82.828	69.171	98.2399	51.6146	Spermidine synthase
Csa2M008750.1	137.458	141.287	86.81	157.915	118.568	185.891	214.296	Metallophosphatase domain-containing protein
Csa5M139110.1	137.171	119.886	264.468	93.736	96.7018	90.8253	70.9663	Ubiquitin fusion protein
Csa3M914000.1	137.115	128.834	77.2564	49.1351	87.6458	110.373	93.7568	Cytochrome b561
Csa1M033190.1	137.095	140.546	180.754	141.978	164.853	130.061	140.098	Alpha/beta-hydrolase
Csa3M119760.1	137.084	137.926	163.705	62.9959	93.4742	78.1429	59.3208	Auxin-regulated protein
Csa3M232960.1	136.988	141.273	28.4795	30.008	20.5489	67.6244	14.1601	Acetylglucosaminyltransferase
Csa4M015750.1	136.97	133.84	148.054	91.7441	121.28	92.2867	68.0448	Prolyl-tRNA synthetase
Csa7M412850.1	136.915	130.98	74.4775	84.3783	72.2831	104.512	54.5286	ATP-dependent RNA helicase
Csa1M629070.1	135.978	145.014	72.0228	120.947	117.093	150.493	126.032	Smg-7
Csa1M597100.1	135.975	136.369	71.6452	41.9445	75.8686	99.6759	60.6986	Methylthioribose-1-phosphate isomerase
Csa5M165850.1	135.901	116.387	7.97254	28.257	22.6208	10.4603	77.4267	AP2 domain class transcription factor
Csa4M011600.1	135.881	128.95	142.195	216.407	157.886	278.129	336.554	Protein IQ-domain 13
Csa7M073540.1	135.787	133.941	63.6334	64.0195	62.4995	95.015	77.467	RING/U-box domain-containing protein
Csa4M064040.1	135.691	132.919	26.1511	121.61	60.6154	102.3	198.376	ATP binding protein
Csa6M486950.1	135.681	129.557	263.172	162.432	171.347	123.16	135.411	MRNA, clone: RTFL01-34-D04
Csa4M089780.1	135.628	145.231	428.139	186.898	173.678	135.235	115.744	Ubiquitin-60S ribosomal protein L40
Csa5M638420.1	135.51	134.175	188.605	153.813	120.335	117.142	62.4446	40S ribosomal protein S19
Csa5M615230.1	135.463	137.407	308.434	209.771	183.332	146.956	118.309	60S acidic ribosomal protein
Csa2M171870.1	135.402	125.336	415.102	202.468	184.666	147.231	112.302	Ribosomal protein L17
Csa4M598000.1	135.394	137.205	370.264	226.993	320.294	151.431	130.005	Triosephosphate isomerase
Csa6M487570.1	135.22	133.897	193.021	100.309	263.735	20.3061	52.5965	ABC transporter family protein
Csa3M823050.1	134.928	132.738	46.5516	54.3444	53.2465	103.702	90.7621	Hydroxymethylglutaryl-CoA lyase, mitochondrial
Csa1M537320.1	134.867	126.852	16.9956	85.3714	15.8766	11.9753	60.8577	Triacylglycerol lipase
Csa5M612910.1	134.753	129.534	94.4099	63.786	94.8218	79.4535	79.1545	Calcium-dependent calmodulin-independent protein kinase CDPK
Csa3M913980.1	134.583	134.966	228.7	126.356	151.494	123.054	146.962	RAB1C
Csa4M004270.1	134.548	127.498	50.1351	67.2693	59.5713	96.3414	53.2596	DEAD-box ATP-dependent RNA helicase 24
Csa6M042490.1	134.489	139.837	37.2047	53.2227	80.4683	155.468	154.036	Fructose-1,6-bisphosphatase, cytosolic
Csa1M568530.1	133.937	143.09	244.742	200.527	130.218	109.221	73.093	60S ribosomal protein L39-1
Csa7M019330.1	133.921	144.929	16.3008	20.6973	67.2042	42.3755	30.4025	Expansin
Csa1M423110.1	133.887	140.92	30.6822	47.8354	37.9694	64.2663	33.6983	Syntaxin/t-SNARE family protein
Csa2M012660.1	133.794	128.492	557.201	503.209	368.341	365.317	460.079	Cysteine synthase
Csa3M151480.1	133.75	118.722	7.70172	28.4552	7.211	220.372	215.726	CASP GSVIVT01017796001
Csa2M362510.1	133.493	132.938	37.7273	48.4416	43.1701	99.3509	52.4381	JHL18I08.3 protein
Csa6M505280.1	133.452	127.261	111.709	165.603	117.445	170.998	101.179	Histone h1/h5
Csa3M363180.1	133.238	126.019	92.5305	90.578	128.26	176.333	162.064	2-isopropylmalate synthase 2, chloroplastic
Csa7M051370.1	133.14	126.634	264.631	90.1483	212.958	95.1696	54.7176	Ketol-acid reductoisomerase
Csa1M085390.1	133.1	117.037	187.117	160.405	156.875	93.7413	77.9013	Nucleic acid binding protein
Csa2M401270.1	132.973	132.625	69.9958	78.7471	79.3403	174.607	107.782	Delta-aminolevulinic acid dehydratase
Csa3M202720.1	132.773	123.301	97.5872	87.4302	87.6603	106.945	85.2948	Poly(A)-binding protein
Csa4M025100.1	132.692	125.687	239.353	159.279	209.786	161.866	234.564	Methionine sulfoxide reductase
Csa6M450410.1	132.69	129.496	147.739	61.6295	99.0917	126.953	75.5137	Fructose-bisphosphate aldolase
Csa1M589650.1	132.502	128.186	45.2417	268.442	96.9869	81.8196	218.407	Calmodulin binding protein
Csa6M507320.1	132.497	129.707	158.726	89.8565	111.9	103.872	83.2898	Prolyl 4-hydroxylase alpha subunit
Csa7M337080.1	132.403	130.201	105.202	127.711	88.6458	122.273	99.8332	SJNBa0027H09.16 protein
Csa3M166280.1	132.247	121.175	324.124	248.04	284.799	165.507	167.287	Universal stress protein
Csa6M403600.1	132.243	125.951	159.191	192.252	187.754	75.5778	334.804	Actin cross-linking protein
Csa4M197830.1	132.231	134.121	321.989	139.638	220.88	148.285	145.637	2,3-bisphosphoglycerate-independent phosphoglycerate mutase
Csa6M439410.1	132.22	130.465	168.824	92.9543	163.034	162.102	112.637	Cinnamyl alcohol dehydrogenase
Csa6M513530.1	132.166	130.267	100.122	143.561	151.757	142.463	276.327	WRKY transcription factor 28
Csa3M077600.1	132.08	1122.31	258.02	243.589	245.348	337.847	228.176	Calcium-dependent protein kinase
Csa1M680120.1	132.026	130.787	17.2668	8.22771	13.2738	33.1788	7.80223	L-allo-threonine aldolase
Csa5M180920.1	131.981	125.547	13.2776	41.5855	42.1966	75.0141	207.569	Nucleic acid binding protein
Csa5M171160.1	131.969	138.723	366.678	182.774	161.419	142.698	87.7227	Ribosomal protein S10, eukaryotic and archaeal form
Csa7M237890.1	131.878	134.645	28.888	55.113	48.6301	59.8753	62.6494	ATP binding protein
Csa7M419640.1	131.694	131.32	92.0051	83.1584	76.0202	127.178	99.7824	Autophagy 8h
Csa6M486670.1	131.491	129.18	64.9068	106.59	79.2682	110.638	79.2376	MRNA, clone: RTFL01-06-09
Csa6M087750.1	131.491	129.968	79.3318	77.8533	71.2963	99.914	58.1342	Ubiquitin family protein
Csa3M011620.1	131.478	123.79	91.5162	55.3117	62.6864	22.6415	115.11	Transcription factor AtMYC2
Csa1M538280.1	131.45	123.434	132.005	75.6342	91.4467	76.9301	32.4285	Cationic amino acid transporter
Csa4M091920.1	131.415	134.323	162.305	154.603	155.023	136.578	194.602	NAC domain class transcription factor
Csa3M116710.1	131.181	125.623	505.299	257.417	301.524	131.338	121.853	Nucleoside diphosphate kinase
Csa1M420310.1	131.168	126.957	132.483	86.1775	198.708	72.0534	76.6266	CNSTANS-like zinc finger protein
Csa7M026240.1	130.971	136.825	224.129	193.722	174.334	124.787	162.573	Phloem calmodulin-like-domain protein kinase PCPK1
Csa6M521000.1	130.691	131.43	27.7911	37.1479	45.2368	45.3704	27.3339	Leucoanthocyanidin dioxygenase
Csa4M000850.1	130.66	129.458	9.35638	10.0913	15.6172	120.402	29.3291	Gene of unknown function
Csa4M341560.1	130.656	119.957	504.824	124.428	166.609	88.5189	245.733	EF-hand calcium-binding protein
Csa5M604950.1	130.602	132.716	53.5031	58.7766	45.7124	65.0815	77.2698	Kelch repeat-containing F-box family protein
Csa5M487690.1	130.47	1088.78	0	0	0	269.015	86.739	Conserved gene of unknown function
Csa2M229930.1	130.456	131.92	107.421	149.705	91.9536	134.335	108.654	Ethylene overproducer-like 1
Csa2M110250.1	130.333	121.609	27.6922	32.6898	51.603	60.5209	42.215	Ribulose-1,5 bisphosphate carboxylase/oxygenase large subunit N-methyltransferase, chloroplastic
Csa5M141040.1	130.192	126.618	1331.57	636.751	1399.13	350.429	835.425	Cucumisin
Csa3M560240.2	130.025	128.986	107.967	122.706	116.939	131.005	96.3228	Vacuolar ATP synthase subunit E
Csa4M243400.1	129.971	119.561	733.203	143.156	378.284	695.709	431.021	Conserved gene of unknown function
Csa4M312880.1	129.78	100.845	51.2464	19.4887	36.268	33.2219	7.20013	Abscisic acid receptor PYL4
Csa6M514860.1	129.765	123.91	51.8921	95.7914	54.0984	50.4274	50.1981	Glucose-6-phosphate/phosphate translocator 2, chloroplast
Csa6M106180.1	129.757	114.91	145.341	165.635	127.573	105.262	79.2727	Transcription factor
Csa3M817210.1	129.642	127.045	36.7452	51.228	54.2542	66.3518	65.1991	Transcription elongation factor
Csa5M615220.1	129.544	128.074	288.796	333.726	551.881	241.653	764.342	Copper chaperone
Csa6M140790.1	129.515	133.032	70.7352	97.7142	66.9264	96.5096	65.8861	Calcium/calmodulin-dependent protein kinase kinase
Csa7M446890.2	129.506	123.32	208.821	115.172	122.323	96.9542	73.6161	Ribosomal protein L37
Csa2M370550.1	129.465	126.645	40.8888	38.5283	24.0938	47.3783	33.4556	Mads box protein
Csa6M490880.1	129.121	109.347	37.1774	46.6762	26.3933	72.6079	53.9712	Conserved gene of unknown function
Csa1M049460.1	129.05	969.969	63.8416	102.578	241.174	99.4336	86.3025	BTB/PZ and TAZ domain-containing protein 1
Csa7M428820.1	128.908	127.631	83.106	76.2023	65.8529	139.519	88.6044	SAP1
Csa3M122320.1	128.827	130.879	79.363	94.2554	83.5736	84.0719	78.348	Conserved gene of unknown function
Csa3M418720.1	128.467	128.418	189.079	162.562	133.346	125.183	115.251	Transmembrane protein 14
Csa4M000980.1	128.338	131.238	144.86	167.873	104.957	142.902	104.453	Conserved gene of unknown function
Csa1M013160.1	128.195	130.595	189.539	153.525	105.632	79.1574	82.9415	UPF0139 membrane protein
Csa6M517390.1	128.018	129.655	131.541	164.652	133.899	131.734	126.239	Protein kinase (PK)
Csa7M025720.1	127.828	122.747	262.63	149.564	154.3	134.514	87.2758	40S ribosomal protein S11
Csa1M696420.1	127.761	134.724	185.647	188.744	125.18	122.214	63.7294	40S ribosomal protein S24
Csa7M049180.1	127.596	124.543	76.2832	107.134	84.6285	118.413	66.1151	Small GTP-binding protein
Csa1M042350.1	127.403	120.244	121.037	133.951	74.6005	77.9795	53.4139	MYB transcription factor MYB84
Csa5M348070.1	127.281	115.385	78.3555	94.1824	71.4248	80.3085	58.5166	PRP38 pre-mRNA processing factor 38 domain containing B
Csa2M287060.1	127.089	131.737	191.71	176.369	158.184	211.566	160.865	Thioredoxin-like U5 small ribonucleoprotein particle protein
Csa4M361860.1	127.059	130.141	162.085	121.118	167.271	136.421	113.97	Nucellin
Csa6M091990.1	126.696	127.931	187.55	209.201	157.388	121.948	140.594	Pyruvate dehydrogenase
Csa6M505310.1	126.537	111.233	355.983	100.289	126.722	110.434	77.3902	60S ribosomal protein L8
Csa6M157100.1	126.486	128.938	133.931	145.256	122.981	116.789	102.665	Glycogen synthase kinase-3 beta
Csa4M124900.1	126.423	125.424	267.538	160.55	142.186	114.602	75.0501	60S ribosomal protein l9
Csa1M573730.1	126.239	122.024	174.893	84.834	124.587	98.2056	76.9471	EMB2755
Csa3M131930.1	126.167	125.848	308.55	165.504	194.442	113.617	90.5043	60S ribosomal protein L13a
Csa1M063580.1	126.16	133.716	89.2874	104.678	98.1975	137.951	102.687	Tobamovirus multiplication 1
Csa5M471600.1	126.064	130.702	45.3324	259.047	128.894	144.876	313.863	Pho1
Csa3M186700.1	126.035	124.651	130.664	114.012	115.563	80.2904	58.6067	Negatively light-regulated protein
Csa7M450800.1	126.012	115.099	27.4912	45.9937	31.4874	52.1181	28.4347	Nucleic acid binding protein
Csa5M593320.1	125.947	121.466	78.0302	151.47	98.2316	160.707	181.946	RCC1 and BTB domain-containing protein
Csa5M604280.1	125.94	127.453	49.0787	116.911	114.498	210.928	212.391	Nitrate transporter 1.2a
Csa1M002890.1	125.907	118.299	106.812	82.7898	141.252	99.4372	71.5521	Ribonucleoprotein, chloroplast
Csa2M382610.1	125.208	130.132	84.3536	96.5681	108.166	113.045	102.418	Ccr4-associated factor
Csa4M047980.1	125.2	129.227	65.1498	118.776	83.9999	146.408	150.116	Hydroxyproline-rich glycoprotein
Csa1M042970.1	125.022	125.913	138.601	97.6808	97.624	78.4653	90.1718	JPR RF1 protein
Csa1M057040.1	125.009	130.001	71.4498	119.233	97.3286	126	83.1169	Serine/threonine protein kinase
Csa4M307390.1	124.936	127.947	269.386	122.191	181.55	155.314	118.569	Beta-tubulin 16
Csa6M495730.1	124.904	122.303	29.7056	29.9778	43.2987	54.4461	47.105	N-acetyltransferase
Csa7M343300.1	124.846	115.617	93.944	75.1081	76.7287	86.7029	119.353	RIN4
Csa6M523990.1	124.842	125.636	75.3576	68.4287	67.0241	112.196	61.8389	F-box family protein
Csa2M361830.1	124.448	125.128	111.859	42.0346	73.994	22.1793	9.93442	Conserved gene of unknown function
Csa7M073520.1	124.287	137.823	223.099	128.758	103.925	31.3214	257.72	JHL03K20.5 protein
Csa6M448110.1	124.079	106.137	469.928	57.1264	238.341	126.607	233.183	Tonoplast intrinsic protein
Csa4M337920.1	124	120.42	18.9598	17.9591	20.2289	71.2154	51.7774	Xidoreductase
Csa4M003730.1	123.956	113.05	96.695	61.3247	90.2662	84.5605	78.4835	ATP-dependent Clp protease proteolytic subunit
Csa6M517210.1	123.841	120.081	175.881	122.991	123.082	116.374	109.292	Conserved gene of unknown function
Csa7M048060.1	123.753	115.124	0	0	20.1705	14.4106	22.8155	Conserved gene of unknown function
Csa6M179480.1	123.707	128.257	50.8096	67.0983	59.0694	82.3982	38.6647	Big map kinase/bmk
Csa1M614120.1	123.495	121.764	47.5431	78.178	65.3034	81.472	63.521	Calcium-dependent protein kinase
Csa5M077780.1	123.378	122.738	164.719	139.685	139.277	138.099	98.4646	Auxin response factor
Csa2M360710.1	123.37	1038.05	641.085	1149.89	575.137	1002.92	820.761	Signal peptidase I
Csa1M186610.1	123.024	104.421	52.7586	34.3764	104.834	34.953	34.4748	Vacuolar citrate/H+ symporter
Csa3M131920.1	122.972	117.375	161.627	81.0359	111.866	95.4468	97.6227	Vacuolar H+-ATPase c subunit
Csa7M014580.1	122.934	124.973	181.934	135.022	169.587	134.129	123.888	Vacuolar H+-ATPase subunit B
Csa4M608130.1	122.874	118.037	31.2168	52.5281	36.0404	37.3397	82.7556	Basic 7S globulin 2 small subunit
Csa3M183360.1	122.808	123.669	149.467	74.5092	76.6283	86.2247	37.9328	Fibrillarin 2
Csa3M822500.1	122.795	130.204	66.2956	61.5227	83.3744	45.4642	73.9884	Type IIB calcium ATPase
Csa1M637960.1	122.787	129.929	88.1363	166.486	94.1429	123.734	86.0364	J domain-containing protein spf31
Csa4M166930.1	122.758	116.396	203.907	155.79	152.241	116.847	107.702	ATZI1
Csa7M407630.1	122.707	118.228	171.44	138.621	102.97	145.356	151.775	GTP-binding protein sar1
Csa3M002830.1	122.526	121.399	105.878	62.5387	78.3797	110.981	91.2994	Seven transmembrane receptor
Csa6M147620.1	122.477	111.445	149.151	77.7324	105.211	86.5339	125.347	Heavy metal transport/detoxification domain-containing protein
Csa2M403690.1	122.297	115.607	259.518	143.911	160.775	115.148	122.862	SLL1 protein
Csa6M365730.1	122.205	116.727	221.879	187.61	135.988	113.197	72.8625	60S ribosomal protein L5
Csa5M224130.1	122.157	117.954	63.3815	122.326	37.793	197.559	247.635	Cytochrome P450
Csa3M878960.1	122.051	123.361	141.71	181.291	129.151	142.031	121.999	CTC-interacting domain 5
Csa4M009350.1	121.955	117.127	441.529	179.613	339.069	114.834	78.6804	Calreticulin
Csa4M652070.1	121.912	106.907	239.268	75.0388	129.921	76.1202	67.3864	Stromal cell-derived factor 2
Csa3M740070.1	121.902	123.454	130.772	118.515	145.471	130.291	178.072	29 kDa ribonucleoprotein, chloroplastic
Csa1M042920.1	121.858	120.832	34.5115	18.111	16.2546	21.7789	16.4919	Protein TIFY 6B
Csa4M015700.1	121.841	119.636	87.4	69.628	71.4424	79.6593	49.6275	Mov34-1
Csa2M307850.1	121.699	115.999	187.358	476.795	181.487	287.416	256.788	DRE transcription factor 1
Csa6M031450.1	121.692	105.474	84.8465	90.2588	92.0142	109.569	91.8427	Membrane protein
Csa5M580660.1	121.578	107.622	65.0755	80.4671	100.535	52.2337	62.6346	Lipoic acid synthase
Csa6M185830.1	121.284	111.71	473.776	466.388	307.614	129.371	142.791	Undecaprenyl pyrophosphate synthetase
Csa6M290910.1	121.125	110.515	180.613	112.649	128.394	103.507	95.0494	Proteasome subunit beta type
Csa3M121020.1	121.084	114.92	218.88	103.518	124.87	113.681	111.389	24 kDa seed maturation protein
Csa3M006720.1	121.041	121.588	96.9784	136.374	95.3368	136.619	71.5662	26S proteasome subunit
Csa7M219200.1	120.974	123.395	88.9472	80.5518	51.1547	69.1161	45.7542	GDP-L-galactose-pyrophosphatase
Csa6M515490.1	120.898	114.612	6.04374	15.2587	16.5137	37.9922	37.2873	Serine-threonine protein kinase, plant-type
CsaUNM017640.1	120.783	116.175	102.737	190.346	140.165	262.422	99.0499	Conserved gene of unknown function
Csa4M047880.1	120.753	122.206	65.3891	44.416	53.6925	97.1523	50.3201	PLAC8
Csa4M651850.1	120.745	122.755	84.1009	76.7838	76.8167	93.5834	60.0825	Eukaryotic initiation factor iso4G
Csa4M017050.1	120.62	848.504	219.334	107.409	227.853	448.302	269.434	Extensin class 1 protein
Csa3M017020.1	120.582	109.667	118.698	30.3144	50.891	46.8157	21.5603	Beta-amylase
Csa2M060380.1	120.491	127.558	55.858	62.319	60.8082	78.4612	46.3716	Galactose mutarotase
Csa3M122520.1	120.481	123.928	142.371	137.168	134.217	116.954	92.4714	Dead box ATP-dependent RNA helicase
Csa3M597330.1	120.309	115.118	212.719	112.632	107.749	105.206	96.4686	Translocon-associated protein, beta subunit
Csa6M424540.1	120.305	128.422	39.8604	66.8179	56.3516	18.6853	51.782	Hexose carrier
Csa5M179780.1	120.244	126.163	41.151	85.9307	75.9627	48.8168	31.9451	Cation efflux protein/ zinc transporter
Csa5M604020.1	120.06	118.593	81.5772	96.3829	73.1992	75.0986	56.434	Serine/threonine-protein phosphatase
Csa1M569270.1	119.975	122.464	352.807	56.0447	167.422	152.829	100.446	HSP90-2
Csa3M881580.1	119.701	114.322	134.512	78.6064	112.178	106.251	104.554	Aspartyl-tRNA synthetase
Csa4M050830.1	119.51	117.532	91.5643	65.0469	71.6027	82.6824	72.9603	6-phosphogluconate dehydrogenase, decarboxylating
Csa3M173020.1	119.405	120.896	10.8883	25.3407	15.7495	76.9225	40.3751	Electron transfer flavoprotein-ubiquinone oxidoreductase
Csa5M608520.1	119.394	118.953	116.073	56.5691	91.0388	91.4715	77.6595	Serine/threonine protein phosphatase 2a regulatory subunit A
Csa4M001670.1	119.356	115.448	32.5382	42.7991	58.7131	85.6725	47.245	Chloroplast protein import component Toc159
Csa7M432580.1	119.306	121.228	63.3918	145.902	84.1173	179.167	105.878	Conserved gene of unknown function
Csa6M157680.1	119.289	124.933	250.398	292.969	203.736	173.288	185.352	SUM
Csa2M351790.1	119.278	113.77	120.571	90.825	96.1471	109.131	95.1537	F17H15.1/F17H15.1
Csa7M291690.1	119.261	116.263	167.495	106.399	124.673	186.452	180.894	Peptidase
Csa1M021920.1	119.154	130.831	238.567	231.846	146.427	142.778	85.0197	Ribosomal protein S28e
Csa4M133700.1	119.05	117.202	85.843	76.4509	87.3471	86.7136	86.6761	Pyruvate decarboxylase
Csa6M513450.1	118.939	124.247	7.2612	36.9126	7.23196	64.8126	31.6458	Chaperonin-like RbcX protein
Csa7M394010.1	118.889	121.754	66.2772	66.4728	59.2478	43.7834	62.5198	Ring finger and CHY zinc finger domain-containing protein 1
Csa7M009720.1	118.881	122.716	125.547	124.372	90.4233	114.677	63.0762	Translocon-associated protein alpha subunit
Csa6M058200.1	118.705	110.006	989.143	1318.64	2682.18	3151.93	2233.87	Extensin
Csa1M573590.1	118.684	122.614	299.762	172.759	152.705	115.95	74.464	40S ribosomal protein S25
Csa5M177110.1	118.6	116.909	179.996	162.629	107.562	99.4471	89.3591	Arginine/serine-rich splicing factor
Csa6M411270.1	118.053	122.477	67.3982	125.336	72.0273	87.48	62.3794	Ribosomal protein S7
Csa2M297150.1	117.854	108.827	89.9595	68.0152	73.7337	71.7717	54.7523	Heterogeneous nuclear ribonucleoprotein A1
Csa3M838720.1	117.796	111.324	170.042	130.187	68.9509	19.4042	29.7698	Raffinose synthase
Csa3M859670.1	117.758	115.628	80.7263	92.7649	174.086	55.1069	42.2592	ST225
Csa1M039190.1	117.451	97.3045	247.644	103.13	95.7362	91.9757	62.7408	Glycine-rich RNA-binding protein
Csa3M733270.1	117.14	110.968	93.3841	110.069	121.782	130.899	162.969	Universal stress protein family protein
Csa5M492350.1	117.074	116.108	151.472	112.925	104.139	108.416	152.16	Conserved gene of unknown function
Csa1M042990.1	117.066	118.754	120.947	74.9819	90.0129	72.9868	75.7447	MRNA, clone: RTFL01-13-K15
Csa1M056970.1	117.01	112.577	114.021	151.038	114.16	65.2598	57.5592	Allantoate amidohydrolase
Csa5M589940.1	116.972	117.196	45.3175	22.9362	24.2839	69.4981	73.0638	Caffeoyl-CoA -methyltransferase
Csa1M041570.1	116.917	116.584	59.6635	96.239	39.9398	47.1915	54.5185	Phospholipid-transporting ATPase
Csa2M075300.1	116.909	117.597	66.2267	75.857	102.088	118.691	133.208	Amino acid transporter
Csa3M686210.1	116.898	112.469	52.0835	96.3525	91.5377	114.534	150.318	Conserved gene of unknown function
Csa1M168920.1	116.895	105.237	73.0094	210.658	103.969	63.7474	401.436	Ccr4-associated factor
Csa4M011730.1	116.882	114.891	14.3342	42.6997	37.808	60.2294	47.3785	Inositol transporter 1
Csa2M361820.1	116.814	109.855	248.908	103.989	150.887	114.091	105.954	Proteasome subunit alpha type
Csa3M878840.1	116.699	113.877	223.759	113.229	149.219	107.011	93.5518	Ubiquinol-cytochrome C reductase complex 14 kDa protein
Csa3M912940.1	116.403	120.427	264.783	155.41	201.959	174.639	201.306	Bax inhibitor
Csa6M417900.1	116.376	117.379	48.5382	71.914	86.3224	50.9733	67.3669	J000114_01.6 protein
Csa7M379080.1	116.242	120.247	15.041	41.3924	34.2814	81.8343	83.0371	Type IIB calcium ATPase
Csa6M074530.1	116.233	120.237	88.437	109.519	87.3779	144.695	148.111	Peroxisomal biogenesis factor
Csa7M293750.1	116.179	112.288	212.285	156.115	130.123	110.425	63.5425	40S ribosomal protein S18
Csa4M003640.1	116.035	116.367	33.037	55.6805	164.366	32.1241	46.0443	RING/FYVE/PHD zinc finger-containing protein
Csa6M140800.1	116.032	124.418	43.5483	75.1654	50.6387	79.3459	68.4576	Gene of unknown function
Csa4M642500.1	116.023	120.152	162.103	164.707	100.246	101.137	168.229	Conserved gene of unknown function
Csa1M448420.1	115.933	119.951	145.401	97.6824	87.4016	89.5156	44.2525	60S ribosomal protein L18a
Csa5M173520.1	115.833	116.405	35.3367	85.8455	42.7609	101.885	59.7741	ATPP2-A13
Csa5M583360.1	115.71	118.377	285.718	299.265	328.074	265.113	393.307	Cysteine proteinase inhibitor
Csa4M062360.1	115.658	117.75	343.859	143.581	168.118	107.447	90.9346	60S ribosomal protein L27
Csa2M000790.1	115.616	125.63	6.99124	7.64438	32.4022	29.322	10.4456	Conserved gene of unknown function
Csa3M728020.1	115.202	110.424	104.104	124.147	80.4224	127.422	113.212	PV72
Csa4M000680.1	115.126	108.319	434.777	147.089	202.627	114.368	271.364	Adhesive/proline-rich protein homolog
Csa7M419630.1	114.961	100.814	67.3284	29.2024	55.4631	71.9574	79.5011	Conserved gene of unknown function
Csa4M016380.1	114.921	15.0499	17.9862	8.44583	11.7571	17.1465	22.2588	Gene of unknown function
Csa7M041870.1	114.814	114.659	515.977	447.246	364.885	203.094	938.495	Auxin-induced in root cultures protein 12
Csa5M182630.2	114.316	117.99	50.9893	53.8619	65.5768	49.6692	73.9869	Double-strand telomere binding protein 1
Csa1M266160.1	114.245	110.971	111.049	74.4991	98.2815	112.754	87.8492	Endosomal P24A protein
Csa2M251490.1	114.232	107.095	59.6753	131.821	66.7355	57.4548	136.415	GATA domain class transcription factor
Csa7M391240.1	114.203	111.031	47.1573	54.9108	47.6541	63.6929	39.7118	Gibberellin receptor
Csa3M135120.1	113.873	103.483	18.7749	57.8932	25.6353	29.2396	25.6372	Ethylene-responsive transcription factor 1B
Csa6M125240.1	113.819	115.741	8.94819	29.507	68.4867	263.095	175.115	Indole-3-acetic acid-amido synthetase GH3.6
Csa3M149910.1	113.752	104.864	61.0399	28.235	96.1288	71.5761	58.9976	Conserved gene of unknown function
Csa3M121710.1	113.731	122.98	164.198	142.387	123.908	138.375	119.277	Bypass1
Csa7M397040.1	113.711	107.154	116.256	99.94	76.306	81.8323	67.4287	Arginine/serine-rich splicing factor
Csa5M157400.1	113.273	107.172	119.967	113.081	126.977	112.037	101.392	Zinc finger A20 and AN1 domain-containing stress-associated protein 1
Csa4M064020.1	113.261	100.827	1095.68	422.006	1178.15	175.778	473.259	Chloroplast photosystem II PsbR
Csa5M175710.1	113.142	115.316	11.2615	45.9765	14.7391	98.1609	117.866	DNAJ heat shock N-terminal domain-containing protein
Csa3M189860.1	113.104	113.833	59.2217	76.1817	64.3702	116.281	65.2007	Methionine aminopeptidase
Csa4M645960.1	113.061	101.059	259.653	127.341	177.062	156.08	197.726	NADH ubiquinone oxidoreductase PSST subunit
Csa6M501970.1	113.042	108.171	28.0875	67.807	39.9692	65.1469	41.9571	Gene of unknown function
Csa1M385550.1	112.843	97.9059	84.0557	68.851	81.833	91.2799	118.858	Conserved gene of unknown function
Csa3M538670.1	112.801	126.507	207.252	111.164	110.547	115.9	75.9235	Cytochrome C oxidase
Csa2M406130.1	112.596	112.881	28.9535	43.3866	63.6482	70.5736	84.9095	MRNA, clone: RTFL01-09-K19
Csa7M290500.1	112.547	104.088	46.6774	122.385	61.4288	60.9826	51.0413	Lipoate-protein ligase B
Csa4M045000.1	112.544	98.9791	178.352	160.46	180.966	182.434	157.705	Ubiquitin carrier protein
Csa3M656490.1	112.538	114.287	83.7351	86.5988	94.609	73.8897	70.5228	Alanyl-tRNA synthetase
Csa4M285750.1	112.467	106.563	59.113	125.7	205.517	709.881	397.024	Netting associated peroxidase
Csa1M002810.1	112.362	104.203	85.1558	81.0344	91.9399	115.485	43.5025	Methionine sulfoxide reductase type
Csa1M497310.1	112.348	110.334	122.296	97.4828	125.359	102.955	118.393	Endoplasmic reticulum [ER]-type calcium ATPase
Csa4M427270.1	112.301	111.309	76.5845	59.0414	59.3505	79.7038	66.5952	2,4-dienoyl-CoA reductase
Csa7M049210.1	112.288	109.058	157.37	93.4542	184.446	77.9791	146.074	Cell division protein ftsH
Csa6M501260.1	112.203	114.035	22.8187	14.8763	29.393	14.0283	16.7216	Gamma-glutamyl transferase
Csa1M051620.1	112.005	109.484	0	6.422	7.8758	12.9343	0	Metal ion binding protein
Csa4M310190.1	111.987	111.353	75.9123	64.1214	76.1376	66.4692	57.8218	LIMR family protein
Csa6M507340.1	111.72	106.975	107.416	82.999	77.6381	81.105	64.6911	Arginine/serine-rich-splicing factor
Csa6M356490.1	111.708	101.803	213.571	240.076	218.08	215.26	307.392	Serine/threonine-protein kinase cx32
Csa2M285350.1	111.62	101.09	163.398	134.237	96.0371	109.188	66.0987	60S ribosomal protein L26
Csa5M643940.1	111.509	110.124	40.7832	60.0802	50.7653	57.5923	41.3312	Nuclear matrix constituent 1
Csa5M604980.1	111.388	114.957	217.89	157.199	138.073	99.8905	53.6655	40S ribosomal protein S9
Csa2M171890.1	111.385	106.835	111.882	94.1681	80.5331	90.4993	69.5576	Eukaryotic initiation factor iso4E
Csa1M084280.1	111.213	113.014	123.243	55.3317	98.7508	86.8574	65.3094	Protein disulfide isomerase
Csa5M604290.1	111.155	117.301	55.1364	95.677	100.59	26.7124	20.2135	PAS/LV protein 1
Csa1M418250.1	111.139	111.955	134.01	147.409	102.32	120.122	101.2	Serine-threonine kinase receptor-associated protein
Csa3M827380.1	110.862	101.665	115.27	147.281	132.149	187.417	150.214	Thioredoxin
Csa7M351910.1	110.82	106.347	112.012	119.732	104.6	89.5753	95.6654	MRNA, clone: RTFL01-48-B14
Csa1M250150.1	110.743	102.879	100.43	96.7722	67.841	46.4362	41.4848	ATP binding protein
Csa3M893360.1	110.719	115.921	67.3019	59.8366	45.1165	72.44	100.519	Phosphoglycerate mutase
Csa1M005510.1	110.71	118.882	48.6895	72.8469	55.7123	66.9732	56.4526	Protein kinase atmrk1
Csa3M144230.1	110.698	102.526	65.3377	37.3544	75.7365	83.7292	79.055	Sulfate adenylyltransferase
Csa2M404780.1	110.586	111.292	115.702	102.179	88.1456	79.4445	51.1002	Ligopeptide transporter PT family
Csa6M344280.1	110.509	111.161	86.4395	63.1226	57.4719	93.9154	94.6933	F-box/LRR-repeat protein
Csa2M000550.1	110.431	101.15	199.583	169.925	158.11	130.565	96.9645	Hydrogen-transporting ATP synthase, rotational mechanism
Csa3M901130.1	110.207	105.148	38.9447	77.3689	85.2358	39.9457	90.6761	Conserved gene of unknown function
Csa6M511040.2	110.119	91.5564	188.202	174.444	172.695	93.8985	64.7187	Proline-rich protein
Csa6M431760.1	110.053	104.707	89.3596	154.171	95.0013	89.2366	95.6648	RING finger
Csa5M621940.2	109.621	113.728	70.6495	57.246	55.4403	58.6583	39.1767	Far upstream element-binding protein
Csa6M497240.1	109.452	101.148	10.5414	32.3133	17.9095	38.7371	41.8836	Hydroxyproline-rich glycoprotein
Csa3M829070.1	109.428	103.095	60.0195	46.1174	53.2207	44.635	32.5493	Transducin family protein
Csa3M036450.1	109.329	108.488	66.731	76.6801	70.1772	126.943	78.9351	Glycine-rich protein
Csa6M511620.1	109.144	108.929	53.973	74.5855	82.0111	78.6556	162.708	SCL domain class transcription factor
Csa3M017260.1	109.127	112.597	149.332	148.889	126.141	100.941	120.266	RAB1C
Csa1M503400.1	109.035	107.281	96.3823	96.3664	88.1615	102.95	89.5276	Ubiquitin carrier protein
Csa1M045670.1	109.026	111.875	137.072	129.071	115.411	138.732	110.074	ATP binding protein
Csa7M049260.1	108.794	117.456	105.301	137.576	114.722	45.3911	110.07	Protein phosphatase 2c
Csa5M168780.1	108.689	104.379	281.415	102.097	117.253	100.254	70.479	60S ribosomal protein L13
Csa3M118190.1	108.56	108.678	80.0197	105.947	88.9757	80.7417	74.3912	CBL-interacting protein kinase 12
Csa5M643970.1	108.394	113.835	223.408	176.617	173.552	109.481	104.999	Proteasome maturation protein
Csa5M611620.1	108.264	107.088	66.0585	58.6055	61.4934	61.0396	41.6235	Sarcoplasmic reticulum histidine-rich calcium-binding protein
Csa6M301020.2	108.221	108.948	49.8424	76.0797	83.4839	117.463	94.9946	Phototropin-1
Csa5M576620.1	108.203	104.402	256.381	124.087	170.662	106.205	98.0848	ATP synthase subunit beta
Csa2M354800.1	108.201	104.989	98.3933	68.0152	55.1592	49.9146	30.2762	Adenine phosphoribosyltransferase
Csa7M448880.1	108.127	104.658	205.189	160.998	146.002	116.938	102.41	Proteasome subunit alpha type
Csa2M173050.1	108.127	115.807	132.09	135.657	106.079	115.151	81.4205	Peroxisomal membrane 22 kDa (Mpv17/PMP22) family protein
Csa3M134680.1	107.902	106.298	60.8039	76.7825	64.4729	101.64	52.9239	Pre-mRNA-splicing factor
Csa6M518290.1	107.815	80.2137	61.4348	49.3215	40.5435	39.8743	54.4224	Ethylene-responsive transcription factor
Csa6M424530.1	107.737	107.069	43.6702	23.5664	46.4166	14.9434	46.3191	Sugar transporter
Csa5M611060.1	107.327	111.818	133.17	110.605	118.785	98.1499	105.059	Sec-independent protein translocase protein tatC
Csa5M652250.1	107.219	111.677	33.1548	57.2142	50.1867	98.4082	65.4594	Proton-dependent oligopeptide transport family protein
Csa2M354110.1	107.195	100.248	13.9085	13.0904	28.119	28.7848	22.6553	Conserved gene of unknown function
Csa7M363070.1	107.082	113.551	263.372	123.662	205.289	89.0806	59.5827	Fk506-binding protein
Csa6M044030.1	107.067	106.578	59.321	63.5859	56.8433	91.3829	49.9416	Poly-A binding protein
Csa1M427510.1	107.013	112.468	15.9933	51.3034	58.8624	241.929	230.444	Leucine rich repeat protein
Csa5M606410.1	106.959	109.082	97.9819	87.9704	87.8514	79.0024	77.9056	Protein kinase
Csa6M022350.1	106.786	105.027	122.7	137.93	98.7123	89.3345	82.0188	Splicing factor U2af large subunit B
Csa7M058540.1	106.777	108.202	87.268	92.4985	76.8822	54.2403	31.9451	Phosphatidylserine decarboxylase
Csa4M063480.1	106.76	106.866	194.439	179.996	125.411	105.962	104.315	NPR1/NIM1-like regulatory protein
Csa7M024130.1	106.668	110.962	120.17	135.207	140.354	133.596	156.18	Serine/threonine-protein kinase cx32
Csa6M133770.1	106.444	99.2253	93.3961	90.9376	80.7115	54.6654	36.8089	AP2/ERF domain-containing transcription factor
Csa7M071470.1	106.421	110.235	31.6366	79.2186	47.0259	54.6389	54.9709	Amino acid transporter
Csa2M000380.1	106.182	107.011	128.414	145.005	121.519	120.617	121.952	Casein kinase
Csa3M000690.1	106.137	106.489	28.2901	15.6184	26.883	20.4384	33.5893	Auxin efflux carrier family protein
Csa4M651790.1	106.122	100.293	45.2547	40.6324	42.8246	64.3165	48.8072	Tsi1-interacting protein TSIP1
Csa1M022520.1	106.088	99.996	94.0153	134.67	133.641	111.184	91.0895	Conserved gene of unknown function
Csa1M537630.1	106.015	104.032	55.3718	52.753	63.3467	57.1711	34.4604	Eukaryotic translation initiation factor 3 subunit
Csa6M046240.1	106.009	104.055	27.8109	14.8369	28.9702	39.303	57.2297	Syringolide-induced protein 1-3-1B
Csa3M914560.1	105.92	90.6985	189.28	100.665	114.914	100.152	72.8084	Plasminogen activator inhibitor 1 RNA-binding protein
Csa6M517320.1	105.877	100.46	39.0978	47.5335	36.4082	74.6179	26.2128	Rnf5
Csa6M104600.1	105.719	109.935	78.9154	60.1108	62.5428	62.0705	41.5097	Elongation factor G, mitochondrial
Csa6M077430.1	105.718	107.014	161.238	117.714	119.193	104.58	75.9912	40S ribosomal protein S13
Csa3M827370.1	105.479	104.067	247.901	118.299	144.855	117.791	92.1914	Porin/voltage-dependent anion-selective channel protein
Csa2M374670.1	105.355	107.155	96.3314	104.777	101.313	94.3614	99.8327	Tocopherol cyclase
Csa2M431070.1	105.313	103.342	134.661	49.6072	102.695	55.5812	65.0318	Alcohol acyl-transferases
Csa6M505970.1	105.285	101.777	30.114	30.9661	38.4751	26.8433	38.7884	AR1 1
Csa3M199590.1	105.158	103.246	8.64634	6.06235	30.6725	26.5602	30.9137	R2r3-myb transcription factor
Csa4M642520.1	105.125	108.555	134.461	78.8027	106.746	56.1589	146.86	Calcium ATPase
Csa6M139790.1	105.119	107.226	45.5243	44.9975	26.9345	54.8331	30.1451	Glutamine amidotransferase subunit pdxT
Csa3M036390.1	105.025	91.535	130.438	132.678	95.8227	80.0805	78.2617	Calmodulin
Csa4M109020.1	104.978	108.014	131.202	145.831	117.535	125.214	144.139	Protein phosphatase 2c
Csa1M029600.1	104.944	105.869	168.872	101.106	139.673	131.864	119.582	Transmembrane transporter
Csa2M004710.1	104.886	105.215	142.026	77.7974	104.324	63.0312	288.028	Arabinogalactan peptide 22
Csa2M076540.1	104.882	102.783	99.8561	92.4418	95.7422	90.2529	89.606	Xpa-binding protein
Csa1M057010.1	104.864	102.285	33.9951	34.4895	35.842	81.2898	72.5197	Bifunctional purine biosynthesis protein
Csa2M286440.1	104.832	105.458	107.366	89.9297	90.5539	95.9426	88.9634	Calcium-binding protein CML20
Csa6M494950.1	104.728	98.4014	15.6909	23.1439	23.0652	45.2323	43.719	Acyl-CoA-binding protein, acbp
Csa1M256760.1	104.714	99.2576	93.7177	83.043	77.7473	69.6253	59.5009	Complex interacting protein 9
Csa7M448760.1	104.602	105.985	102.783	88.7448	82.5839	61.2028	58.0517	25.3 kDa vesicle transport protein
Csa6M185260.1	104.563	106.997	124.81	85.8568	86.7508	91.4078	68.9069	Transcription factor
Csa5M576770.1	104.455	111.728	66.2039	105.409	81.8049	119.106	65.1935	Nucleotidyltransferase
Csa6M424010.1	104.407	107.273	83.2544	74.2097	105.613	61.0676	82.1011	Vacuole membrane protein
Csa4M292970.1	104.395	104.894	261.199	106.253	145.447	106.752	78.0624	60S ribosomal protein L4
Csa3M782620.1	104.28	102.136	62.1458	82.2972	73.5478	104.127	60.6806	Bel1 homeotic protein
Csa6M520240.1	104.15	100.313	111.402	60.3277	174.563	64.9922	137.508	Trehalose-6-phosphate synthase
Csa2M033350.1	104.035	103.504	96.6098	173.272	87.4332	68.1736	147.914	SJNBa0058G03.4 protein
Csa4M045060.1	103.843	106.341	11.5854	30.8642	20.4581	51.5313	32.8492	BZIP domain class transcription factor
Csa2M416170.1	103.796	106.436	112.909	40.9265	80.4309	107.494	33.7524	Transferase
Csa2M336100.1	103.766	107.485	204.957	105.26	116.218	111.98	70.4598	QM
Csa1M574970.1	103.757	105.642	98.0299	125.409	100.754	104.256	100.094	Hexokinase 2
Csa3M904130.1	103.751	113.532	97.8043	93.7857	87.1617	123.832	77.6455	MRNA, clone: RTFL01-33-D01
Csa6M103010.1	103.729	88.4894	177.632	152.582	122.019	94.5757	75.9445	Fiber protein fb11
Csa2M007970.2	103.636	106.239	104.6	105.278	101.34	117.697	115.98	Ubiquitin system component Cue protein
Csa2M351610.1	103.607	98.2016	50.7042	56.0251	35.2913	80.5785	49.585	Grave disease carrier protein
Csa4M012460.1	103.287	101.28	167.46	116.868	127.031	112.221	112.085	SJNBa0008A08.11 protein
Csa2M010270.2	103.201	92.1378	200.573	134.97	102.828	151.475	80.1713	Histone H1
Csa6M193610.1	103.114	96.6671	127.516	81.2084	76.9306	95.3728	111.323	RNA and export factor binding protein
Csa4M012400.1	103.106	104.5	239.261	134.735	142.044	143.478	144.656	Nuclear transport factor
Csa3M143600.1	103.101	104.365	56.4054	67.5685	52.015	71.6157	54.8123	Conserved gene of unknown function
Csa3M011600.1	103.041	114.855	75.2321	55.9355	69.8945	60.596	54.8254	Arf gtpase-activating protein
Csa4M293310.1	102.927	103.819	120.767	72.2602	94.5005	100.17	91.9506	Diaminopimelate epimerase
Csa3M781050.1	102.739	86.9276	54.3367	110.597	71.743	64.3861	42.8082	Nudix hydrolase 26, chloroplastic
Csa3M635870.1	102.526	93.4694	12.0048	10.6411	8.95225	43.1897	39.5199	UDP-glucosyltransferase family 1 protein
Csa5M598090.1	102.355	104.567	8.54415	19.2706	34.332	52.2593	67.6832	Gene of unknown function
Csa3M146340.1	102.313	107.723	15.6879	11.5437	10.426	64.6105	17.3498	Sulfate/bicarbonate/oxalate exchanger and transporter sat-1
Csa4M307890.1	102.252	101.172	121.614	119.272	123.189	120.123	84.6336	Chaperone protein dnaJ
Csa6M133730.1	102.247	102.089	138.829	135.5	117.86	97.9211	94.5952	26S protease regulatory subunit 6b
Csa3M000140.1	102.247	98.8883	98.4203	62.5961	64.9366	60.2478	51.2235	Thioredoxin reductase 2
Csa6M486730.1	102.204	100.482	103.166	104.526	83.6942	84.163	72.0856	Splicing factor
Csa5M624430.1	102.173	98.8821	58.7828	123.441	76.39	163.162	183.369	TGA-type basic leucine zipper protein TGA2.1
Csa4M167980.1	102.164	101.409	132.552	111.294	155.023	70.9215	65.3037	Alkaline alpha galactosidase
Csa6M365200.1	102.097	112.463	27.4106	44.2194	85.1268	77.4627	102.856	Conserved gene of unknown function
Csa7M420160.1	101.907	100.352	96.6625	97.1703	92.6231	74.4215	50.5295	Serine/threonine-protein kinase PBS1
Csa4M126470.1	101.662	103.035	106.127	135.637	129.06	142.795	142.863	Protein disulfide oxidoreductase
Csa3M698560.1	101.625	93.9482	193.15	114.996	125.019	76.788	54.5162	60S ribosomal protein L6
Csa4M331090.1	101.499	107.926	70.1703	68.9912	43.9121	66.449	39.5046	CBL-interacting protein kinase 22
Csa7M394020.1	101.368	99.5599	24.4731	20.7007	34.2815	25.3616	57.4174	Gene of unknown function
Csa6M500400.1	101.348	104.521	87.0815	73.1535	49.5864	71.1885	68.5304	80A08_22
Csa1M065920.1	101.2	96.4723	166.953	75.0009	93.3933	68.4945	69.6251	Receptor kinase
Csa5M198760.1	101.059	104.101	96.1183	96.1541	85.3576	87.5327	99.3256	Peroxisomal membrane protein pmp34
Csa1M013770.1	101.038	98.8325	224.668	164.031	161.17	116.472	128.263	Glycine-rich RNA-binding protein
Csa6M181560.1	101.029	94.2897	30.6734	9.12722	14.1517	8.16427	0	UDP-glucosyltransferase
Csa2M356630.1	100.936	100.684	72.4509	59.3447	67.4389	69.0613	58.083	Zinc finger protein binding protein
Csa1M013780.1	100.847	86.531	106.608	209.442	116.288	78.3756	78.7549	Gene of unknown function
Csa1M002140.1	100.819	102.942	117.24	76.0178	87.7051	84.6544	56.2781	Nucleolar protein nop56
Csa6M032500.1	100.711	99.5182	52.7738	73.8461	57.8964	63.4866	59.2074	DNA binding protein
Csa7M014550.1	100.619	100.696	59.3354	98.9685	66.6605	53.3589	61.7237	Protein phosphatase 2c
Csa7M451350.1	100.617	100.284	104.18	75.2241	103.663	102.904	94.5589	Protein SEY1
Csa3M904100.1	100.524	98.6638	6.80758	5.74631	4.95666	7.52345	0	Ribose-phosphate pyrophosphokinase
Csa6M147530.1	100.395	100.307	198.353	64.9975	144.204	91.2853	70.3212	RuBisC large subunit-binding protein subunit alpha, chloroplastic
Csa4M640960.1	100.231	103.351	80.1581	53.1182	58.9954	68.9407	188.883	N-hydroxycinnamoyl/benzoyltransferase 1
Csa1M085890.1	100.163	97.2602	67.5587	57.5927	73.1837	52.81	51.0565	Protein ML
Csa3M018820.1	100.124	102.816	79.6892	201.678	112.786	53.7168	36.8765	Mutt domain protein
Csa6M487650.1	99.9845	92.8566	0	0	0	19.1689	12.6537	Transcription factor
Csa4M083660.1	99.9666	91.3927	49.1292	59.3614	39.5694	67.0644	35.5382	Heterogeneous nuclear ribonucleoprotein A2/B1
Csa6M500720.1	99.9537	107.17	31.4526	67.6725	47.8267	56.7857	36.6496	Conserved gene of unknown function
Csa5M139240.1	99.927	103.537	32.7661	80.8782	66.8409	85.1302	50.1862	Fad NAD binding oxidoreductases
Csa7M253730.4	99.9125	104.604	95.9922	167.727	134.33	163.18	141.475	Ubiquitin carrier protein
Csa2M382470.1	99.7904	82.5926	29.5392	29.9943	41.2902	23.9649	88.4689	Gene of unknown function
Csa4M624450.1	99.7617	101.218	180.921	124.753	81.2845	73.3277	43.9255	ATP binding protein
Csa1M009860.1	99.588	96.9494	179.192	111.346	97.0149	102.714	69.2666	60S ribosomal protein L34
Csa6M052700.1	99.4807	101.837	28.1872	51.8811	22.0666	102.871	54.5864	Ripening regulated protein DDTFR8
Csa5M647440.1	99.36	102.679	84.4214	76.5823	87.7213	82.1081	75.5208	DRP
Csa4M109010.1	99.114	87.0488	88.6139	28.8448	58.6976	51.707	56.1393	Alternative oxidase
Csa3M164480.1	99.0501	103.393	59.3233	81.1728	57.353	79.7078	65.887	Fumarylacetoacetate hydrolase
Csa2M286490.1	98.9926	103.114	36.1058	70.4586	54.0167	99.6311	78.4916	Serine/threonine-protein kinase SAPK10
Csa7M428190.1	98.9564	92.2533	211.34	147.885	194.681	122.218	110.057	ATP synthase subunit , mitochondrial
Csa1M172570.1	98.7949	110.911	89.0322	92.4579	74.7641	87.714	80.8204	RAB2A
Csa6M401550.1	98.7857	96.0043	68.6129	57.9591	48.6646	52.4146	47.6002	Serine/threonine-protein phosphatase
Csa6M150560.1	98.7479	91.0096	39.8473	114.675	87.4896	73.8023	96.4554	SIGBa0142C11.2 protein
Csa5M031960.1	98.6541	97.6972	149.005	86.5682	91.3323	94.3209	79.7216	Conserved gene of unknown function
Csa4M247410.1	98.641	98.8203	31.968	42.0101	54.904	44.1957	25.2935	Conserved gene of unknown function
Csa3M651710.1	98.572	102.789	96.0816	99.9924	108.682	90.7199	113.953	Cation exchanger 2
Csa3M838640.1	98.5503	100.442	151.213	76.1338	132.427	83.5423	77.4142	Kinase family protein
Csa7M024010.1	98.4333	94.9617	599.579	193.423	390.183	145.696	204.169	LysM domain GPI-anchored protein 2
Csa1M573600.1	98.3903	99.4367	873.722	434.087	238.8	336.422	136.914	Superoxide dismutase [Cu-Zn]
Csa5M648730.1	98.3396	92.3345	0	14.9468	26.9171	113.082	276.524	(1-4)-beta-mannan endohydrolase
Csa6M516790.1	98.2031	101.337	25.3697	16.4174	36.4932	32.5554	19.0294	Uncharacterized Cys-rich domain
Csa1M560640.1	98.1583	102.218	80.2667	107.738	117.468	143.806	129.317	Pyroglutamyl-peptidase I
Csa3M603030.1	98.1228	105.08	51.6714	94.0556	68.8207	68.9045	98.5421	ATP binding protein
Csa7M278230.1	98.1114	103.827	12.2524	41.318	61.2317	37.9084	108.041	Zinc finger family protein
Csa4M627210.1	98.0831	99.408	295.24	181.496	101.959	76.384	108.802	Phosphoenolpyruvate carboxylase
Csa1M423090.1	98.0502	96.7444	57.574	56.6018	52.8273	58.4647	32.5164	Porin/voltage-dependent anion-selective channel protein
Csa3M653380.2	98.0337	102.497	278.46	125.498	118.043	102.057	80.2474	60S ribosomal protein L44
Csa3M741830.1	97.9778	87.2896	70.5825	121.644	75.7977	99.6284	98.2919	Conserved gene of unknown function
Csa6M508020.1	97.6891	96.6076	19.8626	24.2437	49.3406	664.761	546.716	Chitinase
Csa3M845450.1	97.5579	101.963	120.177	118.449	102.56	79.1449	56.7975	NADH dehydrogenase
Csa1M714680.1	97.4825	81.2519	121.141	91.5835	344.505	105.495	153.107	Photosystem I reaction center subunit III, chloroplast
Csa1M569320.1	97.2521	97.6351	96.4118	80.7266	69.8647	78.4796	64.6877	DNA binding protein
Csa4M280600.1	97.2413	91.4018	0	4.30104	0	25.337	8.57287	Proteinase inhibitor I4, serpin
Csa4M013040.1	97.2328	105.018	57.7534	63.8702	59.6915	142.632	131.533	Glutathione peroxidase
Csa7M058530.1	97.2309	99.4553	55.8616	40.2196	62.2528	48.9834	32.3334	Phosphatidylserine decarboxylase
Csa2M381760.1	97.1963	98.8826	87.1763	143.216	50.6746	82.8461	127.879	Ein3-binding f-box protein 3
Csa5M374720.1	97.135	83.5579	14.3068	13.2697	23.7146	19.2871	18.1967	Cold shock protein
Csa2M074190.1	97.0612	99.0323	68.5255	93.2557	62.1824	157.5	127.018	Multidrug/pheromone exporter, MDR family, ABC transporter family
Csa7M432250.1	96.897	107.127	32.2361	141.074	80.1397	121.052	108.412	Leucine-rich repeat-containing protein
Csa3M062560.1	96.8512	102.4	52.9727	68.0201	49.7014	111.391	124.128	ATP binding protein
CsaUNM018640.1	96.8248	101.468	23.0495	72.9061	36.5721	82.6899	64.9556	Fyve finger-containing phosphoinositide kinase, fyv1
Csa2M336670.1	96.7546	101.85	165.465	73.5574	85.6958	92.7893	66.417	Translation initiation factor
Csa2M140370.1	96.7086	87.8603	561.687	114.997	217.789	101.939	94.2556	Adenosylhomocysteinase
Csa1M569520.1	96.7005	103.866	79.1902	54.0483	82.1343	123.379	76.9707	Translation initiation factor
Csa6M518190.1	96.5126	84.9818	41.2307	67.8127	45.7098	64.7412	102.183	Glutaredoxin, grx
Csa4M192090.1	96.5062	87.2455	89.4624	76.4926	74.4051	69.5719	84.9123	FMN binding protein
Csa1M050170.1	96.4283	97.5791	128.352	99.0072	116.555	98.7649	81.3228	26S proteasome non-ATPase regulatory subunit
Csa1M024920.1	96.4275	93.2731	23.865	96.3863	48.7695	83.0322	78.6137	Xidoreductase
Csa3M878200.1	96.4054	101.029	101.688	85.8655	54.9265	137.504	71.9695	Grr1, plant
Csa4M179700.1	96.3885	87.3333	116.305	94.4726	103.431	49.7411	65.9734	Ligopeptide transporter 4
Csa4M050850.1	96.267	97.1422	40.7199	48.9368	39.537	52.2333	32.9276	Aldose 1-epimerase
Csa6M014660.1	96.2126	93.6971	137.306	77.777	81.85	96.3261	58.2895	Elongation factor 1-beta
Csa4M056500.1	96.1557	94.41	45.7604	27.8517	68.051	67.7806	19.8114	PAE
Csa6M052680.1	96.0166	96.9572	53.4612	141.774	122.4	84.6934	134.601	NAC domain protein
Csa3M697940.1	96.0141	97.3646	90.965	72.0371	70.4656	85.2093	125.617	AN1-like transcription factor
Csa3M110590.1	95.9566	96.4557	56.953	27.4274	38.946	46.1936	24.6056	Ras GTPase; Sigma-54 factor, interaction region
Csa6M454350.1	95.9497	101.145	17.2534	8.37567	11.9915	15.7615	18.1217	Iaa-amino acid hydrolase 2
Csa4M377730.1	95.8571	96.0401	54.1059	29.4723	28.5883	16.5071	25.1662	Beta-1,3-galactosyltransferase sqv-2
Csa6M501250.1	95.7717	90.6203	170.568	161.336	136.436	102.148	117.906	Sodium/potassium/calcium exchanger
Csa5M627130.1	95.7717	99.1728	90.4109	99.1107	87.7296	112.138	104.671	Ubiquitin-conjugating enzyme
Csa1M163140.1	95.6754	98.7259	202.773	128.6	133.39	92.868	49.6161	Ribosomal protein
Csa1M690300.1	95.6239	98.9516	85.3776	118.042	76.7676	78.8508	63.6936	Serine/threonine-protein phosphatase
Csa3M135740.1	95.6098	94.7757	156.83	144.247	162.517	205.49	242.208	CmE8 protein
Csa4M646400.1	95.5642	89.6358	65.9119	53.4491	57.2016	56.7992	38.6091	Carbon-nitrogen hydrolase family protein
Csa6M488880.1	95.5483	94.8148	52.6452	92.037	131.515	86.6537	148.836	Kinase
Csa2M129170.1	95.507	95.6263	110.451	92.0621	105.042	109.834	117.878	Vesicle-associated membrane protein 722
Csa7M030000.1	95.5062	95.7441	120.515	67.6194	83.5964	79.8876	71.4414	PDF1-interacting protein 2
Csa6M409920.1	95.4752	106.489	69.6699	84.3896	74.0545	101.286	75.7077	Serine/threonine-protein phosphatase
Csa6M449290.1	95.401	94.2456	54.0683	49.1338	31.5403	30.7838	27.9515	Conserved gene of unknown function
Csa1M015740.1	95.2259	97.3953	26.0463	41.1091	29.3601	78.4776	61.0299	Acetyl-CoA synthetase
Csa6M190370.1	95.0532	98.6092	62.3926	72.7559	60.5265	27.0227	16.309	Protein kinase 1b
Csa7M374550.1	95	96.7606	116.683	118.812	101.011	106.412	97.3761	Ribonuclease t2
Csa4M651910.1	94.9813	95.1034	130.495	47.5141	81.4854	74.0063	64.8666	Endosomal P24A protein
Csa2M363020.1	94.943	97.4349	50.0779	138.128	82.0913	146.163	208.601	Purple acid phosphatase
Csa3M646520.1	94.8051	87.3543	213.115	93.2958	99.6726	85.3889	50.9899	40S ribosomal protein SA
Csa6M483320.1	94.7986	94.343	109.776	98.3508	81.7488	81.3275	110.853	MAP3Ka
Csa2M252020.1	94.694	87.0612	330.102	103.745	370.869	34.9561	28.4909	Fructose-bisphosphate aldolase
Csa6M181590.1	94.5485	96.5705	112.852	79.6306	114.318	103.926	80.9471	Ubiquitin-activating enzyme E1
Csa6M152950.1	94.5485	75.7966	68.6219	81.5626	51.9671	53.4	284.971	Zinc finger protein
Csa2M072440.1	94.3789	96.2337	45.2947	56.0009	45.268	54.6074	48.0765	Conserved gene of unknown function
Csa3M888540.1	94.2924	95.6699	62.8683	67.2464	81.415	66.1717	68.513	Conserved gene of unknown function
Csa4M197820.1	94.1535	97.7325	59.0789	58.7956	69.3312	70.284	70.1833	Proteinase inhibitor I4, serpin; emp24/gp25L/p24
Csa7M375800.1	94.1271	94.7517	37.3972	62.0963	43.1353	74.067	53.8442	ATP-dependent RNA helicase
Csa3M172420.1	94.0924	89.4957	74.9188	49.2688	73.0421	64.1017	60.8378	Protein transport protein sec23
Csa1M007860.1	94.0628	91.4646	34.8911	50.031	31.5637	48.2155	44.477	Ribosomal-protein S6 kinase
Csa3M856000.1	94.0143	91.0228	43.7639	101.3	47.7397	74.2688	77.1355	MRNA, clone: RTFL01-28-M03
Csa6M488340.1	93.9879	95.7448	310.098	285.857	883.603	187.983	359.776	Xygen evolving enhancer protein 1
Csa2M002550.1	93.9106	99.3821	110.173	81.3405	85.7308	86.0053	82.1392	Casein kinase
Csa4M056750.1	93.906	87.4437	74.6036	21.6089	77.7698	23.0096	14.1637	BZIP domain class transcription factor
Csa4M571760.1	93.8323	89.9811	132.23	88.1384	85.1711	91.1088	58.7421	40S ribosomal protein S25
Csa3M115030.1	93.7743	92.8019	163.294	82.9397	118.128	106.515	80.5487	Cytochrome c1
Csa6M445780.1	93.7593	94.9814	38.0821	255.759	112.008	95.6026	156.924	Phenylalanine ammonia-lyase
Csa4M269210.1	93.7067	86.0968	286.945	345.419	334.547	337.887	806.442	Late embryogenesis abundant (LEA) hydroxyproline-rich glycoprotein
Csa6M007470.1	93.6982	91.4345	54.1342	53.4923	92.2223	205.63	214.147	Selenium-binding protein
Csa6M292430.1	93.5941	84.6639	19.8395	8.21564	12.542	16.3459	25.8164	Protein ML
Csa7M407530.1	93.5342	95.3722	187.42	59.2973	115.182	54.3941	44.4037	Chaperone protein dnaJ
Csa1M046870.1	93.4847	95.2603	101.444	112.395	125.695	142.034	139.18	Zinc ion binding protein
Csa3M374210.1	93.4824	97.0857	43.1292	69.9016	50.6492	104.462	65.7564	Casein kinase
Csa7M238970.1	93.4639	96.0376	69.5933	58.8714	54.7302	65.1229	63.5263	2,4-dienoyl-CoA reductase
Csa7M068600.1	93.425	94.651	26.8874	56.0764	29.1744	28.2933	81.5202	Glutamyl-tRNA reductase
Csa4M267990.1	93.3222	88.7986	60.1039	45.7453	46.5134	62.8429	58.2197	Zinc finger protein
Csa1M042660.1	93.174	95.0493	121.639	78.8356	112.577	93.0521	73.8427	Eukaryotic peptide chain release factor GTP-binding subunit
Csa7M420750.2	93.0234	86.1616	233.422	111.505	115.922	121.678	84.2749	60S ribosomal protein L44
Csa3M316280.1	93.0159	100.28	77.7821	84.1813	91.1269	73.7845	49.5162	ARF GTPase activator
Csa1M007850.1	92.9905	93.2798	157.184	80.5416	95.7957	84.6681	73.9746	DNA binding protein
Csa4M664590.1	92.9769	90.2174	97.238	90.835	89.3099	88.3317	92.5636	Squamosa promoter-binding protein
Csa1M590270.1	92.913	91.0798	34.1513	36.0234	36.1532	85.4022	113.19	Threonine synthase
Csa6M487630.1	92.8349	93.3204	121.523	99.9548	101.309	83.1872	80.8253	Ubiquitin carrier protein
Csa5M611600.1	92.6033	92.1141	212.877	103.276	135.267	110.653	94.0514	ATP synthase subunit beta
Csa1M021900.1	92.5783	91.4946	32.2634	156.275	73.567	79.2239	128.32	Zinc finger family protein
Csa1M188170.1	92.5702	89.1852	97.0492	73.4961	71.4886	85.3492	83.6532	Protein pob
Csa2M381890.1	92.5387	89.4683	212.268	39.2436	49.5049	13.5689	0	Hybrid proline-rich protein
Csa3M128910.1	92.4956	90.2045	256.468	189.951	183.495	141.92	130.016	ATP synthase delta subunit 1
Csa3M827420.1	92.4846	94.6897	23.4764	24.4011	24.1139	29.5164	23.4591	Acetylglucosaminyltransferase
Csa3M730800.1	92.4233	95.5456	40.5686	214.693	89.0775	65.2345	254.45	WRKY protein
Csa3M912340.1	92.4066	94.332	74.4891	58.3891	81.1707	69.4299	65.2728	3-isopropylmalate dehydratase
Csa6M502010.1	92.3293	77.0956	16.0233	11.9584	18.9954	24.2146	13.5664	Gene of unknown function
Csa3M113340.1	92.2631	89.1948	115.218	89.4355	78.0521	91.6313	74.3331	PHD finger family protein
Csa3M134920.1	92.1933	83.7958	177.208	129.726	100.63	81.8382	49.8117	Csf-1 protein
Csa4M618410.1	92.1568	92.7722	231.113	340.169	235.962	304.271	526.203	Conserved gene of unknown function
Csa4M106870.1	91.9628	88.1554	98.0231	62.2483	77.8268	72.1864	63.814	BRASSINSTERID INSENSITIVE 1-associated receptor kinase 1
Csa4M093000.1	91.7849	87.7277	170.229	71.3925	105.599	76.6454	75.1867	Mitochondrial processing peptidase beta subunit
Csa4M054800.1	91.7049	90.2425	46.8448	86.4479	69.1842	52.1741	51.0694	Transcription factor
Csa6M487770.1	91.6563	80.6082	105.796	103.029	94.2343	79.0752	95.2114	Homeodomain protein
Csa4M624460.1	91.4377	94.6554	78.7115	57.6974	69.2081	69.2567	31.5609	ATP binding protein
Csa1M045550.2	91.334	89.9605	29.9079	77.6931	61.9632	93.4112	49.2551	HD domain class transcription factor
Csa4M308590.1	91.3238	80.9111	57.6719	76.6783	52.8645	73.9547	78.808	Clathrin light chain protein
Csa2M248130.1	91.2417	92.743	23.1716	13.0194	23.2608	19.5773	10.5074	Phenylcoumaran benzylic ether reductase 3
Csa1M256200.1	91.2176	89.8699	203.057	250.938	185.566	105.48	146.625	Eukaryotic translation initiation factor 5A4
Csa1M033120.1	91.1766	92.1241	469.736	327.785	585.64	125.624	207.687	Glutathione S-transferase GST 12
Csa3M122650.1	91.1441	94.2412	231.587	226.692	140.431	90.4381	99.9279	Cell division protein ftsy
Csa4M308520.1	90.98	91.6027	47.4606	70.997	61.5387	99.4725	47.6038	Protein kinase
Csa2M000570.1	90.9293	90.7712	233.773	122.937	99.8355	90.2143	62.4365	60S ribosomal protein L28
Csa3M595230.1	90.8486	91.4471	162.085	63.4249	98.1745	84.1271	65.4032	Succinate dehydrogenase
Csa5M613490.1	90.8461	89.6848	110.039	110.299	95.3129	68.8552	72.6541	Charged multivesicular body protein
Csa4M173560.1	90.8367	92.5121	106.026	176.182	93.3401	158.83	99.082	Conserved gene of unknown function
Csa4M652730.1	90.8073	83.4826	187.107	250.511	207.267	127.32	151.096	KNAT3-like transcription factor
Csa3M124740.1	90.7985	94.9467	39.7629	43.7071	60.526	61.7441	42.2386	Peroxisomal biogenesis factor
Csa5M179220.1	90.7655	93.401	74.9324	123.247	166.663	96.9372	139.456	Esterase/lipase/thioesterase family protein
Csa4M007010.1	90.7602	92.7188	40.5879	42.257	40.2918	43.1718	31.0565	Golgi snare 11 protein
Csa6M538660.1	90.6929	90.842	265.199	219.845	292.864	274.701	312.431	Vacuolar sorting receptor 6
Csa6M492250.1	90.6926	93.1822	173.13	107.117	119.703	101.267	230.75	Cytochrome P450
Csa2M060400.1	90.601	79.5193	232.414	115.408	86.245	93.7602	72.2824	Acidic ribosomal protein P3
Csa7M407690.1	90.5614	111.866	390.157	218.04	174.886	109.83	102.343	Cytochrome c oxidase polypeptide Vc
Csa3M187320.1	90.5124	85.2707	240.646	89.166	116.532	110.417	78.3979	40S ribosomal protein S19
Csa3M017170.1	90.4364	79.3579	72.6075	87.8627	76.841	73.7421	62.2809	ATP-dependent Clp protease proteolytic subunit
Csa5M172870.1	90.3534	86.2072	38.2589	65.4807	44.2855	73.2263	56.0727	Protein kinase family protein
Csa3M849940.1	90.2394	90.719	71.7333	82.703	64.7593	90.3963	57.1808	Phosducin
Csa6M013340.1	90.1587	91.818	57.5788	43.6521	53.6592	46.3448	27.2442	Conserved gene of unknown function
Csa5M648750.1	90.1127	85.102	65.5138	86.7268	83.5594	69.1662	65.2492	Conserved gene of unknown function
Csa6M041770.1	90.0961	90.8824	85.0655	80.4576	88.0769	104.232	84.6697	Protein ariadne-1
Csa4M293850.1	90.0644	94.7646	149.151	85.0242	108.289	99.2711	115.727	Rab2
Csa3M623950.1	89.9054	86.6252	130.165	123.116	107.993	95.1811	95.8024	Regulatory particle triple-A ATPase 2
Csa6M242200.1	89.8883	91.6913	148.61	147.991	145.075	111.415	133.225	ATP synthase protein I
Csa7M214200.1	89.8721	84.8515	82.5522	74.2919	65.9118	71.8553	34.3514	Prohibitin
Csa6M516870.1	89.8516	97.4139	35.6385	44.8708	128.706	60.3851	101.218	Wound induced protein
Csa4M631580.1	89.808	91.5527	87.1562	30.3293	37.7108	50.359	43.8786	Protein phosphatase 2c
Csa6M004530.1	89.6067	91.3068	97.5238	93.8221	101.878	123.316	123.922	Minor histocompatibility antigen H13
Csa3M021150.1	89.5374	79.2024	507.492	214.507	99.3059	24.1192	0	14 kDa proline-rich protein DC2.15
Csa2M386130.1	89.5237	78.1947	88.7976	63.547	62.1143	66.418	52.449	Mitochondrial ribosomal protein S14
Csa3M889810.1	89.5195	92.4012	173.74	99.3304	141.165	107.051	82.1455	SGF14h
Csa1M006270.1	89.5061	93.852	88.3807	103.799	136.878	137.455	167.857	Betaine-aldehyde dehydrogenase
Csa6M523470.1	89.5025	89.2072	665.925	283.97	653.293	145.867	262.51	Glycolate oxidase
Csa2M381690.1	89.3207	86.781	92.4718	73.1702	62.9427	125.412	86.9616	Triose phosphate/phosphate translocator, non-green plastid, chloroplast
Csa6M501300.1	89.2758	102.792	30.6872	83.026	69.3763	168.661	164.7	Flavonoid 3-hydroxylase
Csa4M551660.1	89.2672	94.6786	118.821	129.077	129.321	78.2267	74.3677	Serine/threonine-protein phosphatase PP2A-3 catalytic subunit
Csa3M319290.1	89.2607	87.0646	432.692	437.151	327.734	49.3021	147.15	Major latex protein
Csa6M504640.1	89.135	89.8089	84.0373	57.0007	73.8056	78.042	75.3731	Aldehyde dehydrogenase
Csa7M031630.1	89.0614	93.9551	87.8832	43.2164	70.5056	72.19	58.3121	Coated vesicle membrane protein
Csa6M194160.1	89.0584	88.8872	247.215	152.379	122.558	139.502	63.4409	40S ribosomal protein S21
Csa7M393450.1	88.9804	88.478	109.303	166.223	127.231	182.528	175.381	Phenazine biosynthesis protein
Csa1M529620.1	88.9614	84.0712	261.662	182.116	95.618	94.9148	64.8164	Binding protein
Csa1M023060.1	88.9498	75.7325	59.0721	52.0496	94.197	52.4417	48.9778	LB domain-containing protein 41
Csa5M526870.1	88.9335	98.4214	90.3631	120.312	86.0933	86.2587	69.5784	Nucleic acid binding protein
Csa1M226430.1	88.9182	86.3903	87.3254	54.2587	70.4933	54.6643	58.5884	Clathrin assembly protein
Csa3M008910.1	88.8365	96.43	69.1438	59.2377	57.1611	71.7869	62.1481	Syntaxin
Csa5M308770.1	88.8068	85.7803	85.1661	51.6056	71.5413	67.1351	47.628	RNA helicase
Csa2M372800.1	88.7661	89.2895	69.8983	132.949	71.4515	103.534	87.7247	Poly(ADP-ribose) polymerase, catalytic region
Csa7M428830.1	88.6644	83.7226	109.484	80.931	82.7703	77.8078	103.003	AN1-like transcription factor
Csa7M048090.1	88.5722	92.0137	299.639	158.687	199.885	122.042	120.729	14-3-3 protein homolog
Csa2M122520.1	88.5175	83.8588	157.731	49.8883	121.833	66.2475	53.8746	Chloroplast HSP70
Csa6M040550.1	88.4568	77.0406	131.897	101.277	98.6865	94.9617	101.045	Glycine-rich protein
Csa4M540120.1	88.2653	87.0632	82.7315	77.1866	65.0798	74.8673	74.1984	Nucleotide-binding protein
Csa6M354370.1	88.2524	95.5778	130.406	83.627	86.5492	64.7578	67.0258	ATP binding protein
Csa3M640610.1	88.1695	82.1159	56.9976	56.1919	43.4714	66.8416	48.7346	CAMP-dependent protein kinase catalytic subunit
Csa3M005570.1	88.1519	88.579	137.987	103.256	138.932	143.764	152.666	Conserved gene of unknown function
Csa2M005990.1	88.1059	67.2826	107.837	94.5811	90.2099	63.5559	91.0008	Conserved gene of unknown function
Csa2M020930.1	88.0727	90.9541	54.7145	38.4374	54.7287	59.3038	43.7135	Step II splicing factor slu7
Csa3M782730.1	88.0526	80.656	79.0413	68.0674	63.656	63.296	64.0481	Expp1 protein
Csa4M063470.1	88.0053	88.9682	129.831	80.9705	94.9743	85.517	81.4112	NPR1/NIM1-like regulatory protein
Csa5M154200.1	87.9162	90.0049	578.799	370.583	365.73	186.355	333.981	Glutathione peroxidase
Csa2M009280.1	87.8625	89.3697	93.1604	93.3282	98.8208	86.299	82.9761	Lipid binding protein
Csa6M524050.1	87.7284	85.4595	64.5293	37.3115	40.1268	40.6386	31.5895	Endoplasmic oxidoreductin-1
Csa3M823060.1	87.7027	66.5624	130.329	178.093	139.053	129.543	274.189	Calmodulin 1
Csa4M651770.1	87.7016	82.4333	179.113	78.825	96.2138	64.335	112.539	Chlorophyll a oxygenase
Csa2M120930.1	87.6888	92.0229	75.7562	78.0229	62.2553	83.1922	56.6401	Protein kinase Ck2 regulatory subunit 2
Csa3M207920.1	87.6334	86.2969	83.9773	73.5588	94.2279	79.6395	88.9629	Alcohol dehydrogenase
Csa3M842070.1	87.598	89.1632	93.5389	111.758	166.266	71.7442	45.0395	Hydrolase, hydrolyzing -glycosyl compounds
Csa4M648530.1	87.4411	84.8746	23.459	34.4107	66.3262	48.6183	56.4992	MTD1
Csa3M180220.1	87.3783	82.7371	113.515	87.0104	121.52	53.58	50.8028	Alcohol dehydrogenase
Csa6M384060.1	87.2713	86.3152	11.8861	7.44847	8.32231	6.56978	5.52815	IAA-amino acid hydrolase ILR1
Csa2M249800.1	87.0369	94.9814	215.55	177.726	133.448	152.848	113.188	Conserved gene of unknown function
Csa2M116250.1	87.0107	87.9195	191.805	216.401	179.49	87.9259	190.367	Phospholipid-transporting ATPase 9
Csa4M000880.1	86.9547	88.4445	72.3244	71.7541	79.7962	102.258	103.777	Vacuolar-sorting receptor 4
Csa6M062340.1	86.9137	89.1992	64.9387	43.5265	56.266	44.9083	42.4595	Conserved gene of unknown function
Csa5M650610.1	86.8907	85.5633	36.9621	61.3006	51.1333	56.2422	40.7826	Squamous cell carcinoma antigen recognised by cytotoxic T lymphocytes
Csa5M198130.1	86.6593	89.3308	240.581	137.417	143.959	104.199	72.6341	60S ribosomal protein L35a
Csa6M504440.1	86.6004	84.948	61.9948	54.7148	34.6431	24.8791	22.4388	ATP binding protein
Csa6M446300.1	86.5975	93.1553	171.544	123.612	117.818	97.5677	90.3319	Isocitrate dehydrogenase
Csa1M043200.1	86.55	1004.12	116.019	317.504	318.733	4179.87	2662.91	Miraculin
Csa3M144210.1	86.5458	89.5467	123.15	157.984	167.011	81.4194	111.867	Calmodulin
Csa3M270270.1	86.5269	89.4995	15.5707	17.6415	20.7059	34.6408	24.7537	Carboxylesterase
Csa6M509560.1	86.5219	74.9531	73.8966	22.9646	64.4122	53.9866	56.4231	Gene of unknown function
Csa2M005320.1	86.3294	87.0731	38.4875	36.3601	45.6038	50.7443	36.2949	Enoyl-CoA hydratase/isomerase family protein
Csa4M648020.1	86.2665	89.0619	58.4756	67.7179	55.1155	74.9927	22.7477	Copper P1B-ATPase
Csa6M006730.1	86.2488	94.5512	114.851	72.9554	78.4911	50.1091	40.0166	Mitogen-activated protein kinase 4
Csa4M293040.1	86.2119	79.2143	39.0153	53.8109	64.7571	88.4622	63.314	Gene of unknown function
Csa7M064020.1	86.1911	84.5406	80.7193	65.4088	81.6323	79.5093	70.28	3-deoxy-D-arabino-heptulosonate-7-phosphate synthase 02
Csa3M002560.1	86.0969	79.33	48.5575	66.9656	88.5457	120.206	145.126	RING-H2 finger protein ATL4M
Csa3M850570.1	86.0805	91.5311	81.1714	137.196	128.222	217.206	179.27	BRASSINSTERID INSENSITIVE 1-associated receptor kinase 1
Csa3M895940.1	86.0038	87.2853	88.3387	80.9974	80.0233	77.7426	72.8057	Transcription factor IWS1
Csa5M023880.1	85.9736	87.8423	66.2493	72.0465	54.6076	72.0819	41.473	TRNA synthetase class I family protein
Csa1M560750.1	85.9366	84.8659	90.7599	76.6849	137.344	43.6623	26.811	GRIP and coiled-coil domain-containing protein
Csa5M633180.1	85.7962	87.0321	82.6832	57.9359	66.4053	60.2852	54.0781	Tap46
Csa4M003610.1	85.7468	87.7225	137.217	112.4	96.7197	106.055	95.4665	GTP-binding protein sar1
Csa7M293740.1	85.6952	89.335	32.1854	92.098	36.9736	92.6346	87.3406	Protein GIGANTEA
Csa5M166410.1	85.6256	84.5282	208.014	138.901	104.001	81.1053	56.8131	60S ribosomal protein L36
Csa3M164470.1	85.6092	92.0595	13.7022	15.8203	18.2169	58.6827	34.7445	Lipoamide acyltransferase component of branched-chain alpha-keto acid dehydrogenase
Csa3M202730.1	85.5376	78.4079	211.749	97.1777	91.2548	84.2362	57.0753	40S ribosomal protein S16
Csa3M462690.1	85.5046	82.403	43.0687	42.8349	50.6389	48.5237	36.822	VHS domain-containing protein
Csa3M859640.1	85.225	91.1053	40.1122	92.1527	53.9838	74.6314	55.4957	Pentatricopeptide repeat-containing protein
Csa3M145770.1	85.1676	83.7373	101.634	58.0879	71.0682	61.6354	56.9108	Coated vesicle membrane protein
Csa1M042200.1	85.0814	85.1838	20.0863	21.8152	37.9221	60.645	41.2266	Carboxylic ester hydrolase
Csa4M358640.1	84.9965	88.8677	56.2356	60.2612	52.5905	65.0542	63.7639	Reticulon3-A3
Csa7M051420.1	84.9787	87.5841	107.882	115.257	80.5751	123.164	120.553	Ccaat-binding transcription factor
Csa3M002510.1	84.9465	84.3051	32.7443	37.3774	48.7281	62.4233	40.8823	NRPB1 (RNA PLYMERASE II LARGE SUBUNIT)
Csa3M576840.1	84.8615	79.0432	27.7585	63.7118	44.422	52.611	42.5646	Cyclic nucleotide-gated ion channel
Csa1M658010.1	84.6515	79.3881	20.7714	47.4964	37.6837	34.6737	65.1614	Tyrosine-protein phosphatase SIW14
Csa5M106020.1	84.6115	82.3364	52.6774	39.7311	66.3352	78.5132	82.9079	Peptide transporter
Csa2M404770.1	84.5908	77.671	106.207	113.045	144.481	113.74	161.54	Conserved gene of unknown function
Csa2M075400.1	84.5106	88.8463	32.4366	44.5272	36.5898	61.1149	31.3225	Conserved gene of unknown function
Csa7M431420.1	84.4839	88.352	156.094	119.854	130.711	99.1111	90.0514	26S protease regulatory subunit 7
Csa1M005620.1	84.4501	84.4664	55.6603	72.5941	68.4111	75.0142	74.7227	DNA binding protein
Csa5M198150.1	84.4112	90.8323	150.077	82.9186	85.4311	75.5221	84.2313	Plastidic phosphate translocator2
Csa5M011660.1	84.4111	87.067	31.8121	92.3619	59.2254	126.659	108.873	Non-lysosomal glucosylceramidase
Csa3M134990.1	84.3679	80.1158	55.0978	41.9403	56.5023	79.3575	68.9118	Zinc finger family protein
Csa6M519680.1	84.3667	84.6832	156.546	107.984	94.2482	118.73	77.7422	60S ribosomal protein L11
Csa2M425750.1	84.352	83.3276	168.559	99.5621	182.46	96.1555	116.197	Cytochrome P450
Csa4M499330.1	84.3298	79.2569	37.8923	38.5678	40.5189	51.1703	33.4395	GTP-binding family protein
Csa5M176010.1	84.2661	82.3703	80.921	77.213	67.7833	48.0217	48.1641	Adenylate kinase 1 chloroplast
Csa6M505910.1	84.2616	87.1877	106.123	160.337	107.477	73.8608	128.573	Calcium dependent protein kinase 16
Csa2M098440.1	84.2104	82.6391	146.233	173.788	121.586	130.03	76.5153	60S ribosomal protein L38
Csa7M011830.2	84.1248	85.0671	231.272	175.513	223.445	121.593	155.038	Peroxisomal ascorbate peroxidase
Csa1M424360.1	83.9904	86.9922	45.0917	42.0699	48.8594	67.0572	45.4967	Xysterol-binding protein
Csa6M425740.1	83.8271	69.0751	10.5031	26.3438	33.2721	31.5514	131.114	F-box family protein
Csa6M444990.1	83.8067	79.7361	281.54	164.039	168.59	123.869	233.119	SAT5
Csa2M271400.1	83.8049	85.6046	75.8994	65.2948	57.2385	60.2288	64.7794	Conserved gene of unknown function
Csa2M073020.1	83.7886	86.3465	36.7957	60.3496	61.4399	78.1107	65.9849	Cohesin complex subunit SCC1
Csa5M623510.1	83.785	78.8343	75.5976	83.8625	90.6745	68.3776	75.4045	SF16 protein
Csa1M305780.1	83.7791	88.3416	68.1022	70.1526	58.2372	76.5062	48.7435	SJNBa0027H09.16 protein
Csa4M025060.1	83.7776	84.8631	113.757	96.1835	84.8903	78.1191	65.4165	RAB1C
Csa2M000160.1	83.7234	83.0132	32.7202	48.42	43.8265	68.2755	43.0495	Suppression of tumorigenicity
Csa7M432440.1	83.7048	86.1319	46.2696	55.0816	70.364	68.6068	53.0598	PRP8 protein
Csa2M433930.1	83.5717	86.0836	16.9868	23.6838	25.3566	39.4854	28.4774	Pleiotropic drug resistance protein
Csa7M419590.1	83.5647	73.5662	79.9265	50.4005	107.791	103.549	70.9919	DPP6 N-terminal domain
Csa1M320340.1	83.5219	84.9978	85.9242	118.968	80.4082	92.585	66.2877	Alba DNA/RNA-binding protein
Csa2M009450.1	83.4471	87.3171	0	11.806	6.47987	37.8403	0	Calcium ion binding protein
Csa3M698470.1	83.3444	88.0706	55.5751	52.7634	39.1821	44.9306	59.1412	Small molecular weight G-protein 1
Csa4M296090.1	83.3037	78.1325	61.7443	42.5138	41.3309	47.5104	45.7498	Protein kinase APK1B, chloroplast
Csa3M483830.1	83.2762	78.9495	86.8942	66.0634	215.551	81.4603	88.157	Photosystem I reaction center subunit VI, chloroplast
Csa3M846060.1	83.1512	84.1606	57.6392	46.644	50.6602	61.4801	38.8001	Hydroxyproline-rich glycoprotein
Csa2M415540.1	83.1154	83.55	34.7835	43.1477	50.656	97.351	104.876	Acyl-CoA oxidase
Csa5M217670.1	83.0584	74.942	102.549	48.4786	46.8019	49.1108	10.4857	Abscisic acid receptor PYL4
Csa1M109340.1	82.6373	79.2872	65.0361	69.5148	57.6036	55.4359	47.6518	SNF7 family protein
Csa3M636970.2	82.5817	78.7872	108.854	91.1902	108.653	97.4086	89.3771	Mob1
Csa2M373430.2	82.5601	83.3575	23.5121	15.1322	16.269	13.9512	16.7035	Malic enzyme
Csa5M152970.1	82.4913	80.6745	89.2154	66.812	94.756	78.6264	90.716	Ubiquitin carrier protein
Csa7M038160.1	82.4038	80.8463	117.561	104.73	87.3756	96.9671	62.8421	B-fold nucleic acid binding domain containing protein
Csa5M158560.1	82.3945	88.1049	29.4944	40.961	28.607	45.3413	33.4496	Maspardin
Csa5M590190.1	82.3014	80.4753	51.2141	107.113	48.7323	71.486	84.2333	Gene of unknown function
Csa5M583350.1	82.2828	69.4212	85.7694	54.3708	56.1477	54.5049	50.0446	Negative cofactor 2 transcriptional co-repressor
Csa6M009480.1	82.1962	83.7959	61.0747	49.6657	54.5381	65.7914	55.2712	LIM domain protein WLIM2a
Csa3M734340.1	82.1801	84.93	40.3954	101.67	41.7182	67.7448	45.9746	SLT1 protein
CsaUNM019690.1	82.1323	76.154	95.6044	147.362	297.221	236.075	244.382	Sugar transporter
Csa6M365750.1	82.1043	86.887	69.7669	50.9916	58.1758	60.4549	54.4981	Mitogen-activated protein kinase 1
Csa4M639190.1	82.0475	80.1317	44.4667	68.2943	65.6656	116.092	88.5942	Conserved gene of unknown function
Csa7M428860.1	81.8288	86.4241	64.3643	82.0256	60.4924	84.6233	58.3328	Gamma reponse I
Csa3M837590.1	81.8165	87.5386	145.684	65.4322	79.0801	58.5287	39.1316	ADP-ribosylation factor 1
Csa3M223320.1	81.7893	83.6969	75.9434	48.822	64.8008	58.8499	39.7661	Translation-initiation factor 3 subunit
Csa2M035500.1	81.6459	88.1661	171.758	115.202	126.182	88.0886	97.6373	Protein transporter
Csa1M611810.1	81.5956	81.135	110.695	94.2875	89.5454	67.6938	62.4796	V-type proton ATPase subunit F
Csa6M401490.1	81.5604	77.0133	38.23	38.9628	38.1388	83.2995	50.1719	3-hydroxy-3-methylglutaryl coenzyme-A reductase
Csa5M623920.1	81.497	68.7024	116.186	262.712	187.705	71.5129	278.801	Gene of unknown function
Csa1M423150.1	81.4965	87.9841	58.4038	51.2955	61.2902	38.7671	72.4933	NADPH--cytochrome P450 reductase
Csa2M006880.1	81.4642	72.7117	320.656	166.313	99.8527	209.143	391.119	Dicyanin
Csa2M354820.1	81.4424	68.7357	38.2346	107.554	14.9441	17.4842	230.571	Zinc-finger protein
Csa4M641590.1	81.422	69.8575	41.6379	16.059	22.752	46.2663	120.535	Dehydration-responsive element-binding protein 1B
Csa2M011530.1	81.413	75.8053	48.7358	26.7007	30.3782	33.4536	25.8998	Ribose-5-phosphate isomerase
Csa2M363570.1	81.326	79.2256	130.275	228.331	170.986	154.445	471.959	JHL18I08.12 protein
Csa7M268510.1	81.3256	80.8574	193.569	121.545	139.995	96.4007	99.7409	NADH-ubiquinone oxidoreductase 1, chain
Csa1M042070.1	81.3163	85.9333	29.5353	54.8248	35.8636	33.6102	37.5159	Aminophospholipid ATPase
Csa6M484580.1	81.2948	64.3554	14.9002	25.2959	20.9539	21.9263	15.402	RING-H2 zinc finger protein
Csa7M026250.1	81.2781	73.7628	65.8682	45.47	62.2651	74.1363	55.4559	Conserved gene of unknown function
Csa3M740140.1	81.1642	80.408	129.045	59.7251	98.7574	54.1701	58.4854	Transitional endoplasmic reticulum ATPase
Csa2M120410.1	81.151	70.6976	191.765	100.137	98.262	68.6137	51.8028	Protein synthesis initiation factor
Csa6M525450.1	81.1476	81.0113	97.4857	90.6526	154.542	92.0031	85.5066	Ferredoxin--NADP reductase
Csa1M039090.1	81.0704	75.9885	54.7736	42.9854	44.3896	43.1101	35.2812	RNA polymerase-associated protein LE1
Csa2M059830.1	80.9979	87.2496	126.435	142.081	68.0471	75.7273	92.3973	Homogentisate phytyltransferase
Csa4M099750.1	80.9451	76.5162	186.296	184.43	109.235	77.3139	130.983	Multidrug resistance pump
Csa1M533660.1	80.8774	76.8873	49.596	31.8419	50.9368	50.1176	38.0816	Chloroplast inner envelope protein, 110 kD (IEP110)
Csa6M452680.1	80.6015	75.9069	26.6854	35.4237	64.3222	72.1215	47.7909	Signal recognition particle protein
Csa1M598870.1	80.5661	75.1458	64.266	86.4017	69.7675	67.5017	61.1489	Nucleic acid binding protein
Csa5M464800.1	80.5521	78.7012	158.005	75.8113	88.9346	78.2751	62.4799	Ubiquinol-cytochrome c reductase iron-sulfur subunit
Csa4M011720.1	80.5035	78.5083	34.7016	43.9926	19.2037	0	16.352	Conserved gene of unknown function
Csa2M169730.1	80.442	80.7765	62.4055	46.9728	60.4628	65.3005	53.2288	Protein transport protein Sec24C
Csa6M502610.1	80.4033	77.3662	92.657	92.9393	72.6748	66.2429	54.9654	U1 small nuclear ribonucleoprotein 70 kDa
CsaUNM008810.1	80.4022	75.7494	57.9523	48.887	49.8246	52.9737	38.0976	Cysteinyl-tRNA synthetase
Csa6M451470.1	80.3161	80.2929	172.431	121.191	227.481	124.879	136.931	Monodehydroascorbate reductase, seedling isozyme
Csa4M515040.1	80.314	81.3595	34.5766	30.0164	33.5238	33.6653	17.662	Serine/threonine-protein kinase
Csa1M183570.1	80.1891	82.3333	44.4338	62.7609	61.9162	64.4992	56.404	Calcium-binding protein
Csa6M093640.1	80.1376	77.3504	156.921	147.102	136.554	122.815	85.9945	Transcription factor
Csa4M538580.1	80.1174	81.9689	57.0345	78.0459	61.9591	76.2874	58.4935	Vacuolar protein sorting-associated protein 26
Csa3M270800.1	79.93	74.5612	74.5464	59.2162	53.1176	72.1168	43.9705	Eukaryotic translation initiation factor 3 subunit G
Csa5M598710.1	79.9135	92.6524	302.659	133.93	134.877	123.093	94.4704	60S ribosomal protein L27A
Csa4M161850.1	79.8004	78.7642	21.9579	24.8129	19.7812	31.5308	16.064	Guanylate kinase
Csa4M046740.1	79.7747	80.4855	56.2578	45.0486	48.2967	60.8175	36.8663	Phosphoric diester hydrolase
Csa3M824820.1	79.7723	80.764	114.859	88.1805	86.0171	87.0772	56.8621	TGF-beta receptor-interacting protein 1
Csa3M710870.1	79.7144	78.3048	53.5093	225.803	75.7527	41.3722	282.934	WRKY protein
Csa3M119410.1	79.7129	74.6183	134.687	70.9057	90.753	104.456	108.562	Rmdl
Csa3M253500.1	79.6676	75.2886	33.442	47.9531	35.1199	79.6982	62.1659	Acetyl-CoA synthetase
Csa1M533450.1	79.6254	74.8629	94.0764	89.8876	76.764	83.4749	103.501	ATEX70B1
Csa4M054300.1	79.5659	83.0705	173.1	116.875	129.147	96.4463	90.3563	26S proteasome regulatory particle non-ATPase subunit 12
Csa6M446370.1	79.5273	84.948	105.173	102.015	73.9505	60.9194	67.4752	Protein kinase APK1A, chloroplast
Csa3M775240.1	79.3192	76.6085	152.67	106.387	134.339	156.262	183.961	Monodehydroascorbate reductase
Csa2M037250.1	79.2984	84.175	198.517	156.46	122.238	95.069	94.7649	Cytochrome c oxidase, subunit 6b
Csa2M361420.1	79.2044	81.6444	114.665	88.7601	103.777	99.2459	90.4467	NAC domain protein
Csa5M151610.1	79.0313	77.7551	208.763	136.512	135.81	99.4025	94.3291	Reticulon B2
Csa3M819800.1	78.943	84.9628	70.3128	75.8112	79.5557	78.0971	56.8368	Vacuolar ATP synthase subunit h
Csa7M047260.1	78.9149	77.7273	42.7743	31.0466	41.7624	36.5716	27.0649	Lipoyl synthase, mitochondrial
Csa3M125530.1	78.8227	82.089	141.331	96.4246	111.049	92.2872	76.2886	Dihydrodipicolinate synthase
Csa3M134800.1	78.8018	79.5265	142.915	109.274	82.5057	85.3004	62.1065	DAG protein, chloroplast
Csa2M360800.1	78.7915	74.7415	15.0223	25.4798	8.02469	0	34.6845	Conserved gene of unknown function
Csa2M307840.1	78.7635	76.602	109.218	62.6939	74.0559	56.4597	56.5083	Endoplasmic reticulum-Golgi intermediate compartment protein
Csa2M378580.1	78.7439	74.328	62.5288	59.0131	67.8057	68.4079	59.3393	Protein ABC1, mitochondrial
Csa4M094510.1	78.7022	70.0818	27.5137	10.6504	26.923	90.2133	53.4567	Gene of unknown function
Csa4M043940.1	78.6841	78.2207	73.1866	61.7815	53.8246	60.7061	71.9091	Set domain protein
Csa4M052630.1	78.6637	81.1968	102.063	76.0775	92.164	75.0056	75.747	Dynamin
Csa1M042520.1	78.6527	78.974	101.517	171.091	120.433	96.4974	194.355	Wall-associated kinase
Csa7M074910.1	78.6123	72.2405	18.43	20.1434	55.9964	23.7756	16.8043	Conserved gene of unknown function
Csa4M314440.1	78.5783	61.5525	32.5429	0	4.04334	0	20.1812	Light-inducible protein atls1
Csa4M089270.1	78.5662	82.2048	48.5423	63.9449	51.0931	57.6712	56.3893	Ring finger protein
Csa2M351000.1	78.5256	80.3578	85.1062	64.8347	65.9849	59.8368	35.7669	Nucleolar GTP-binding protein
Csa2M263980.1	78.4906	72.2379	82.5767	32.9622	40.3773	45.4196	44.3177	Translation initiation factor
Csa6M399780.1	78.4378	85.4502	72.7142	102.619	72.8126	79.547	73.2197	Histone mRNA exonuclease 1
Csa2M382590.1	78.2907	83.7626	67.5353	96.5097	77.2473	84.5526	100.319	Ccr4-associated factor
Csa5M603960.1	78.2602	82.3162	44.1409	58.338	56.6155	61.7603	50.7935	WRKY domain class transcription factor
Csa2M308350.1	78.255	81.271	116.12	514.449	83.5958	259.909	204.723	WD-repeat protein
Csa1M050450.1	78.2417	81.1958	38.4011	45.3834	37.7916	51.2734	30.015	Conserved gene of unknown function
Csa4M293160.1	78.2407	83.5396	133.827	64.4822	80.6764	87.5758	82.3394	Lung seven transmembrane receptor
Csa5M640010.1	78.2049	78.4957	81.1344	57.7311	59.1243	59.4651	36.0059	Cop9 complex subunit 7a
Csa7M379100.1	78.1903	78.0444	25.182	80.1746	51.2362	93.2172	74.7318	Beige protein
Csa3M825080.1	78.0827	82.4626	208.067	275.887	324.084	209.052	246.704	Cytochrome P450 monooxygenase CYP72A59
Csa3M133380.1	78.047	76.2642	722.947	765.571	618.049	411.401	666.6	Glutathione S-transferase
Csa3M115610.1	77.9343	72.7316	147.29	142.127	107.206	91.3904	85.5992	Cytochrome-c oxidase
Csa3M019350.1	77.9267	81.4991	79.2987	103.524	88.0382	127.441	154.311	Protein-tyrosine phosphatase mitochondrial 1, mitochondrial
Csa6M306320.1	77.9043	78.3201	59.769	62.8159	54.9325	54.5018	45.1565	Kif4
Csa4M096620.1	77.7387	81.2499	66.8032	77.9101	66.9042	71.7033	65.8485	Peroxisomal abc transporter
Csa3M239850.1	77.7344	73.6977	35.3771	68.8743	43.5332	59.7334	54.6536	Ubiquitin ligase
Csa7M041930.1	77.5926	80.6325	65.8679	101.869	79.5184	94.8443	94.7235	LysM receptor-like kinase
Csa3M915100.1	77.5598	69.2507	109.996	104.767	94.1016	63.7939	43.5808	Remorin
Csa7M450550.1	77.5546	77.4103	119.449	67.3957	75.4696	81.4443	51.7885	Transcription factor MYB884
Csa4M615240.1	77.5459	79.1788	76.0409	85.0339	61.2726	36.3047	18.8451	Phytochrome-interacting factor 5
Csa7M448910.1	77.5232	74.6743	105.952	67.6123	110.271	91.2842	76.6574	Subtilase family protein
Csa5M211530.1	77.5191	81.1503	77.1989	73.3935	98.7202	100.43	129.437	Receptor protein kinase
Csa5M505770.1	77.467	79.3415	31.1059	77.7217	73.3909	50.4301	53.6301	Multidrug/pheromone exporter, MDR family, ABC transporter family
Csa2M351800.1	77.4314	78.0843	203.132	127.457	134.436	72.4008	196.081	Ferrochelatase-2, chloroplastic
Csa3M122430.1	77.4304	83.9001	41.4579	24.8816	24.1733	23.2308	27.6175	Acyl-CoA thioesterase
Csa4M639150.1	77.3917	69.1394	114.611	58.4839	70.7602	63.7841	57.6417	26S proteasome non-ATPase regulatory subunit
Csa3M172370.1	77.3396	82.9145	19.9591	13.9629	27.4985	38.0789	0	Csf-2 protein
Csa3M881650.1	77.323	75.2225	88.5277	57.9886	53.7619	62.5077	62.4262	Conserved gene of unknown function
Csa1M021930.1	77.2734	86.3167	177.309	160.964	118.713	96.8166	57.5859	Ribosomal protein S28e
Csa3M881860.1	77.2718	72.1877	7.8476	22.8657	22.0712	46.7453	25.4122	KID-containing protein
Csa3M844870.1	77.259	732.928	265.331	408.964	391.216	1266.94	883.198	Cathepsin B
Csa3M836510.1	77.2216	78.2107	12.3573	16.1735	14.1731	30.9665	11.9919	Protein farnesyltransferase beta subunit
Csa3M280930.1	77.2057	75.0012	80.9867	90.6117	57.6825	56.2593	44.6884	Conserved gene of unknown function
Csa2M360570.1	77.1163	78.9603	16.0263	24.9275	27.1216	23.4871	60.6168	Patatin
Csa1M096630.1	77.1132	70.4975	45.5448	46.6782	46.2807	63.0944	47.9023	MRNA, clone: RTFL01-06-09
Csa3M889140.1	77.0651	79.4446	86.8829	85.4312	58.0009	66.2905	53.5671	Coiled-coil domain-containing protein
Csa5M647270.2	77.0511	69.5535	37.5351	39.0823	36.0708	58.3899	29.5198	RNA-binding region-containing protein
Csa4M090290.1	77.0348	81.0406	86.885	79.2388	79.3127	59.3321	55.8115	Ligopeptidase A
Csa2M386180.1	77.0242	77.1009	40.1105	43.9876	46.6557	50.7002	41.9642	Patellin-5
Csa4M064120.1	76.9488	77.2235	50.675	76.7539	64.6044	68.8624	29.7745	Glutathione S-transferase
Csa5M600950.1	76.9367	78.7623	51.0095	58.299	59.7848	83.2641	63.3954	Polygalacturonase
Csa3M734950.1	76.8817	81.5149	101.256	59.6323	67.0994	57.4415	58.1201	Rab2
Csa1M025940.1	76.8241	80.8829	44.6353	42.4459	53.3851	49.0814	20.579	Inositol transporter
Csa2M263930.1	76.7929	76.6802	120.607	80.6634	78.2273	71.6521	56.6034	Translocon-associated protein, alpha subunit
Csa6M410620.1	76.7142	90.3491	47.2372	97.1014	69.8829	109.505	78.931	Conserved gene of unknown function
Csa6M526320.1	76.7088	71.8388	72.3075	57.2533	45.4252	54.153	53.226	Charged multivesicular body protein 2b-B
Csa5M220910.1	76.6724	79.9165	116.78	148.324	127.571	113.415	95.0765	Alpha-galactosidase
Csa4M038810.1	76.6448	69.2908	58.836	41.0948	32.3704	50.5935	43.1991	Nucleic acid binding protein
Csa6M105680.1	76.5141	67.4926	76.5289	71.1737	66.1463	65.3828	57.7825	Transcription factor
Csa7M447770.1	76.4627	73.5251	138.523	94.2875	152.255	111.099	118.873	V-type proton ATPase catalytic subunit A
Csa2M036090.1	76.4469	73.4581	61.8605	27.9218	39.1832	43.1523	34.6876	RNA-binding protein
Csa1M002660.1	76.4414	82.8168	14.1412	41.9276	7.60841	19.389	16.0277	Aspartyl aminopeptidase
Csa2M348820.1	76.4395	74.1924	285.982	113.94	124.99	76.2957	81.8135	Cytochrome b-c1 complex subunit 8
Csa7M017680.1	76.3666	72.8246	67.1091	58.6644	56.8764	58.3399	58.9917	Geranyl geranyl pyrophosphate synthase
Csa7M378460.1	76.3538	74.8672	42.6464	47.4192	46.0496	43.8477	35.732	Glutathione reductase
Csa7M038690.1	76.3334	78.7601	125.658	80.5172	108.19	71.3946	70.388	26S proteasome regulatory subunit rpn1
Csa5M576650.4	76.296	80.0358	31.5131	80.4197	41.9339	54.7077	41.9954	Phosphatidylserine synthase
Csa2M382750.1	76.2668	79.3835	248.448	224.693	212.94	149.105	237.199	Membrane-associated progesterone binding protein 2
Csa4M083700.1	76.26	73.6954	227.751	92.0886	136.782	84.7439	82.9129	Malate dehydrogenase, mitochondrial
Csa4M008760.1	76.2591	77.5173	35.5458	136.981	60.7792	72.4388	86.1028	Phenylalanine ammonia-lyase
Csa7M407830.1	76.2533	76.4221	79.2595	140.341	74.8807	54.9299	55.6553	Conserved gene of unknown function
Csa2M350420.1	76.1435	75.7813	31.6608	32.8927	19.2206	47.4927	31.4096	B12D protein
Csa6M150550.1	76.1085	73.7069	104.446	58.1776	49.2525	61.5831	34.0181	Histone deacetylase 2a
Csa5M505190.1	76.0865	77.8134	95.8792	139.433	87.6352	79.066	82.1542	Ankyrin repeat-containing protein
Csa4M616790.1	76.0364	81.5001	62.6344	37.0341	47.1603	42.4415	29.0839	DEAD-box ATP-dependent RNA helicase 53
Csa5M622480.1	76.0272	75.7513	36.2572	59.3544	40.9132	78.1267	50.6996	NAC domain protein
Csa5M374760.1	75.9456	65.3311	142.776	86.698	101.088	66.6822	82.5979	Ubiquitin-fold modifier 1
Csa4M443140.1	75.8791	74.6718	62.6163	58.5457	78.6358	60.5257	60.2632	Glucose-6-phosphate 1-dehydrogenase
Csa3M222780.1	75.818	83.3336	108.425	61.3148	79.9362	78.5794	63.3734	Endomembrane protein emp70
Csa3M646530.1	75.6236	78.0657	41.6963	93.5607	75.1577	152.488	144.02	Zinc finger protein
Csa6M404180.1	75.6043	76.0632	143.625	189.603	110.055	120.431	146.54	Protein kinase APK1A, chloroplast
Csa7M071400.1	75.5718	76.3919	103.135	64.3993	80.6177	66.891	65.3696	Zinc finger protein
Csa4M651820.1	75.5453	73.9288	118.629	87.3741	91.6289	73.6065	73.1274	Conserved gene of unknown function
Csa4M304840.1	75.4663	77.2161	77.0329	54.5881	45.7938	41.095	89.7633	Conserved gene of unknown function
Csa4M350590.1	75.4654	83.1186	104.352	139.758	77.8388	56.0332	48.9235	Transmembrane protein 14
Csa6M190240.1	75.4598	79.2485	60.106	85.3693	65.9459	66.9799	51.6918	Nucleic acid binding NABP
Csa5M589380.1	75.4104	55.4666	45.2571	15.3214	21.9783	29.6412	36.6335	Fiber protein Fb25
Csa3M797600.1	75.3789	70.1839	221.65	120.555	89.8667	67.0791	44.8818	Gene of unknown function
Csa2M382780.1	75.2787	75.0063	133.449	27.8782	39.6404	10.9403	16.4099	Monogalactosyldiacylglycerol synthase, chloroplastic
Csa1M005500.1	75.2653	72.9837	41.7377	31.7489	48.7141	53.4728	54.5376	Protein kinase atmrk1
Csa4M083630.1	75.2345	62.1228	104.623	37.4922	50.2181	55.824	44.1483	DAG protein, chloroplast
CsaUNM003070.1	75.2211	80.5923	77.0716	87.0811	70.748	53.6353	57.9269	Conserved gene of unknown function
Csa2M006180.1	75.1506	80.134	95.0843	64.3447	68.9155	74.0018	67.3884	Triose phosphate/phosphate translocator, non-green plastid, chloroplast
Csa7M024070.1	75.142	76.4997	66.5499	62.4726	68.9661	73.3077	64.1435	PDF1-interacting protein 1
Csa6M516890.1	75.1404	75.8082	90.3641	102.445	95.0369	77.2588	108.19	Vesicle-associated membrane family protein
Csa3M592110.1	75.1248	80.6076	76.7738	84.8651	53.3362	58.1206	65.9695	Esterase
Csa3M134930.1	75.1217	78.1297	129.995	90.7627	78.9208	86.4718	45.5151	Csf-1 protein
Csa6M526390.1	75.1031	71.3035	52.5103	75.4393	49.6553	68.2271	50.0917	Zinc finger protein
Csa2M049870.1	75.0967	79.4482	144.752	183.757	138.279	110.824	109.927	Regulatory particle triple-A ATPase 2
Csa6M365720.1	75.0644	74.8082	179.78	127.913	126.339	94.0471	93.5446	Proteasome subunit beta type
Csa5M138460.1	75.0021	74.3713	34.7919	44.2572	39.721	57.8358	36.1531	Conserved gene of unknown function
Csa3M209470.1	74.977	71.5881	93.876	124.693	80.0267	91.6804	86.3688	TLP domain class transcription factor
Csa6M522110.1	74.9105	73.6052	61.7393	37.9622	48.5311	63.1648	46.7764	Conserved gene of unknown function
Csa3M168930.1	74.8603	77.4366	28.04	48.9221	77.6637	45.3353	64.1309	Beta-fructofuranosidase
Csa6M141380.1	74.8314	75.6876	70.5636	60.9741	69.1584	64.9118	61.8679	SIT4 phosphatase-associated family protein
Csa5M171750.1	74.8243	73.6754	79.2905	50.818	58.6774	59.5652	44.3277	Dead box ATP-dependent RNA helicase
Csa5M589260.1	74.8222	82.2626	245.485	1433.81	1087.4	372.985	1939.64	Cysteine synthase
Csa3M730850.1	74.7791	67.5978	158.354	69.887	90.7551	82.807	167.757	Prenylated Rab acceptor protein
Csa6M526240.1	74.7674	79.3443	51.7955	74.1577	63.9969	84.0017	69.8709	WNdr1D kinase
Csa6M327940.1	74.7252	73.0355	58.3301	25.0465	43.5566	45.5625	24.5489	Transcription factor
Csa6M516960.1	74.7137	84.6497	28.2165	136.27	37.0697	28.3101	216.667	F-box family protein
Csa3M625650.1	74.7074	69.9554	183.155	159.893	178.828	114.429	191.533	Vesicle-associated membrane protein
Csa3M047910.1	74.5741	80.6533	55.6491	81.3599	58.7988	78.88	60.7498	Nitrate-induced NI protein
Csa3M730830.1	74.5038	75.0959	64.5091	69.0324	42.4293	47.6359	36.4618	Conserved gene of unknown function
Csa7M073380.1	74.486	67.7476	226.511	134.331	137.104	169.812	303.07	C2 domain-containing protein
Csa5M167110.1	74.4623	61.7803	38.8719	20.5017	27.5883	14.8162	0	AP2/ERF domain-containing transcription factor
Csa1M002770.1	74.454	73.4777	40.319	29.12	29.5723	45.4497	25.805	Histone acetyltransferase
Csa1M701940.1	74.4537	77.6163	220.003	119.627	152.217	103.191	97.7117	Proteasome subunit alpha type
Csa2M033270.1	74.2729	71.3818	58.9923	38.9375	48.6826	58.8346	48.0009	WD-repeat protein
Csa7M075650.1	74.2313	74.9196	46.7805	69.5895	60.471	60.3242	47.3679	Phospholipase A-2-activating protein
Csa3M408540.1	74.1617	74.8989	197.727	110.254	85.2583	93.6035	93.3309	Histone H2A
Csa5M613540.1	74.1485	80.8349	61.8335	56.6898	64.5518	50.3392	47.7496	Exocyst subunit exo70 family protein A1
Csa6M409910.1	73.9655	70.881	49.7228	31.5543	53.5043	70.9169	62.1158	Serine/threonine-protein phosphatase
Csa6M008620.1	73.951	66.6789	62.3219	82.4353	64.7222	63.7393	44.4525	Fk506 binding protein
Csa2M031150.1	73.9303	74.5962	102.622	76.7873	83.3033	67.4865	74.2926	ATP-dependent Clp protease proteolytic subunit
Csa3M778410.1	73.9172	68.4363	146.249	101.017	162.569	96.0006	90.8714	2-cys peroxiredoxin
Csa6M312550.1	73.881	71.302	112.76	74.2305	78.191	71.4835	63.2634	Importin alpha
Csa3M184080.1	73.8695	82.5953	137.802	126.977	116.757	88.1185	57.0084	SGT1
Csa6M507050.1	73.8344	74.0789	67.9802	51.0559	57.4932	51.3844	44.8484	26S proteasome non-atpase regulatory subunit
Csa3M651840.1	73.8286	74.6393	26.4153	34.352	42.8588	37.5961	29.0487	RelA/SpoT
Csa3M730700.1	73.6877	71.0036	90.4669	60.2134	86.5772	69.6695	84.4808	Protein transporter
Csa4M293030.1	73.663	71.5673	92.0194	84.0609	56.673	51.6303	39.0145	Adenylate kinase
Csa2M428380.1	73.6518	60.9869	74.3924	80.4354	72.695	77.8862	82.0206	WRKY protein
Csa1M014470.1	73.509	80.2758	76.3135	72.8105	72.6655	64.9239	47.5938	Phenylalanyl-tRNA synthetase beta chain
Csa5M314860.1	73.4967	68.9679	54.9814	82.7621	66.96	60.616	55.2453	Plastid Tic40
Csa4M088750.1	73.4802	73.6634	9.68943	17.8337	17.5377	41.8109	38.7651	Homogentisate 1,2-dioxygenase
Csa1M481210.1	73.4653	71.7663	141.01	121.992	101.748	93.0171	73.1866	Histone H2A
Csa5M181500.1	73.4401	78.1186	45.7999	58.2125	39.7921	47.5479	37.5425	Dolichyl-phosphate beta-glucosyltransferase
Csa5M203410.1	73.437	71.8303	74.319	115.943	94.7972	78.5698	74.0754	NLI interacting factor family protein
Csa6M007400.1	73.4366	73.7405	41.2904	40.0178	34.2893	35.3535	33.3605	ATPB protein binding
Csa5M598730.1	73.43	74.8242	193.059	136.564	269.33	68.5105	124.044	AlaT1
Csa2M369070.1	73.4062	77.4069	316.269	90.4943	152.683	111.321	99.5334	SGF14h
Csa1M439330.1	73.3631	75.9016	65.2049	22.7827	37.5101	30.8589	15.173	Calcyclin-binding protein
Csa1M587400.1	73.3444	58.6581	47.1189	44.9071	54.6724	89.4662	93.4138	Cytidine deaminase
Csa4M350600.1	73.2717	68.4564	97.7427	37.5023	70.4095	53.4632	47.6322	Transmembrane protein 14
Csa5M290150.1	73.2426	78.3198	63.1892	80.9623	54.6968	49.3115	35.7369	RRNA processing protein RRP7 (ISS)
Csa1M570080.1	73.1407	71.5187	70.4025	48.4907	59.4932	56.8118	41.8132	Protein YIPF1
Csa6M190410.1	73.0728	71.1466	119.027	120.407	109.103	66.5287	61.0502	Triosephosphate isomerase
Csa6M124050.1	72.9152	67.0861	204	158.683	124.405	88.8488	95.8554	Conserved gene of unknown function
Csa1M528490.1	72.8791	70.6046	85.3359	68.275	55.5286	68.5218	55.8288	FUS-interacting serine-arginine-rich protein 1
Csa6M137580.1	72.7656	65.2172	134.888	92.0618	76.0031	89.3597	143.835	YUP8H12R.23 protein
Csa3M002450.1	72.7624	70.0768	46.9448	63.9633	69.3097	56.4586	61.9416	Sec14
Csa3M846560.1	72.7087	75.8973	41.5596	46.2751	41.5172	66.8882	43.2735	CTC-interacting domain 4 protein
Csa3M732410.1	72.6987	72.945	128.536	69.9086	92.2361	70.7899	61.3471	26S proteasome regulatory particle non-ATPase subunit 8
Csa6M041190.1	72.6736	74.1771	65.1787	51.1413	43.8339	53.4551	40.0981	Serine/threonine protein kinase
Csa4M192140.1	72.6216	71.4578	67.3106	78.8794	75.8578	71.3251	66.4571	Casein kinase
Csa3M094510.1	72.5452	59.6326	8.79269	18.744	26.6626	19.7137	23.5905	Rganic cation transporter
Csa3M120380.1	72.4904	65.6471	45.0239	46.5978	42.3522	82.9986	57.6479	Ubiquitin carrier protein
Csa6M022370.1	72.3791	76.2225	28.7097	47.7048	39.6088	35.6478	51.7258	MAC/Perforin domain containing protein
Csa4M011630.1	72.3707	67.2038	123.21	75.2499	89.4043	67.0255	110.873	Stress associated endoplasmic reticulum protein
Csa2M365640.1	72.2972	71.6441	90.2286	48.375	59.9422	47.2095	47.4088	V-type proton ATPase 16 kDa proteolipid subunit
Csa4M268000.1	72.2442	79.4859	124.604	76.2519	110.629	93.1531	83.1849	Pyruvate kinase
Csa7M430240.1	72.2418	71.5485	17.123	24.2545	9.28047	20.5907	8.57059	4-coumarate coenzyme A ligase
Csa6M522140.2	72.1941	74.1924	107.138	91.3875	84.5282	67.9066	58.2703	Programmed cell death
Csa6M382910.1	72.1897	69.7441	147.121	97.6785	106.185	87.0793	76.1277	Proteasome subunit beta type
Csa3M001760.1	72.1468	73.5362	42.4347	44.4585	37.6431	35.9383	39.9236	Serine/threonine-protein kinase cx32
Csa3M402460.1	72.1336	70.9997	62.5196	51.1662	57.0868	56.907	47.631	Conserved gene of unknown function
Csa2M008680.1	72.0436	70.6269	48.8774	37.0457	43.3025	40.868	38.2013	MRNA, clone: RTFL01-07-N16
Csa3M416140.1	71.952	70.0251	71.7953	53.1017	66.212	56.7671	74.2124	DNA binding protein
Csa6M401520.1	71.9321	74.2857	27.6708	45.3876	34.1539	50.9186	23.0998	Serine esterase family protein
Csa2M150510.1	71.9227	74.4951	79.0201	73.7676	83.4052	65.653	68.3612	Plant sec1
Csa5M146230.1	71.9122	70.8859	63.4424	58.1034	55.5616	73.4956	80.7018	Conserved gene of unknown function
Csa3M850490.1	71.907	75.2321	102.38	30.3166	30.8806	22.4417	25.4632	Iaa-amino acid hydrolase 11
Csa5M633280.1	71.837	78.8676	70.4423	63.3372	60.657	67.197	56.1267	Prolyl 4-hydroxylase alpha subunit
Csa5M505240.1	71.8157	74.7177	245.288	99.6116	146.25	90.0381	66.6615	Ribosomal protein L25
Csa7M065140.1	71.8127	69.1822	159.476	168.849	130.933	83.2529	115.255	Magnesium-dependent phosphatase
Csa5M647470.1	71.7849	74.5466	362.216	159.622	226.816	181.202	138.583	Protein disulfide isomerase (PDI) 2
Csa3M879480.1	71.7768	68.5542	116.735	78.3584	85.9466	73.7038	71.9943	Copper ion binding protein
Csa1M434170.1	71.6817	74.4193	29.4386	31.4825	30.2399	30.6497	26.4447	Ethanolamine-phosphate cytidylyltransferase 1
Csa3M127180.1	71.4701	69.9571	59.2295	49.878	42.5741	52.4311	39.5816	Protoheme IX farnesyltransferase
Csa3M143520.1	71.4523	70.5285	208.988	103.816	101.059	70.2359	51.3483	40S ribosomal protein S15
Csa5M080780.1	71.4438	73.2953	86.651	69.451	68.5507	50.0882	38.8461	Threonyl-tRNA synthetase
Csa6M008710.1	71.441	61.1783	44.7917	24.6615	24.5216	31.0394	26.573	Transferase, transferring glycosyl groups
Csa3M415100.1	71.2757	67.0962	59.7821	52.6362	52.4025	53.366	55.614	DNA binding protein
Csa5M468440.1	71.2747	66.0978	114.699	35.5777	69.854	60.1162	67.607	Transmembrane emp24 domain-containing protein 10
Csa5M581690.1	71.2575	72.2866	91.3954	89.0961	96.1887	57.0727	69.855	Binding protein
Csa5M512920.1	71.2561	69.4444	101.614	93.3441	105.313	93.1462	73.3171	Dtdp-glucose 4-6-dehydratase
Csa5M524780.1	71.2045	72.2331	50.646	194.349	71.6333	47.1999	114.577	Cinnamoyl-CoA reductase
Csa3M893420.1	71.1884	68.9287	86.4255	71.8619	61.9538	50.356	54.2334	Ufm1-conjugating enzyme
Csa1M448970.1	71.1416	63.7534	54.59	37.3546	36.3014	46.4524	41.7056	60S ribosomal protein L18a, plant
Csa2M138710.1	71.115	68.6935	175.055	78.8086	85.7826	73.3726	50.7816	60S ribosomal protein L13a
Csa2M059840.1	71.064	71.6381	62.4169	32.6286	51.6843	44.3549	33.6089	Lysyl-tRNA synthetase
Csa3M033730.1	71.0515	70.3302	88.102	115.895	182.756	114.914	197.343	Glycine-rich protein
Csa3M825090.1	70.9833	68.7483	151.21	115.723	256.728	185.651	200.997	Cytochrome P450 monooxygenase CYP72A59
Csa6M091950.1	70.9512	69.5252	189.301	180.598	143.848	147.961	169.885	LITAF-domain-containing protein
Csa4M110060.1	70.94	73.0923	76.0016	64.3197	51.3329	61.6253	41.9171	Poly-A binding protein
Csa2M000300.1	70.9336	72.133	95.0724	69.5845	56.1896	54.6574	78.5453	Ribosomal protein L18ae family protein
Csa3M902270.1	70.9262	68.302	38.5896	53.4227	39.6567	68.0937	40.3366	Transcription factor AtMYC2
Csa1M042670.1	70.9237	67.0887	35.9131	41.2258	38.2658	24.5313	25.359	Chaperone DnaJ-domain containing protein
Csa4M188930.1	70.905	72.1018	25.8678	46.68	37.5566	57.3961	36.664	3'-5' exonuclease
Csa2M000330.1	70.8663	76.5634	98.5592	68.6232	82.0605	72.0512	53.1896	TCP domain class transcription factor
Csa3M735050.1	70.8423	74.0445	28.8558	40.0187	32.9427	51.8944	36.1355	Lipin
Csa5M522950.1	70.6979	65.4942	64.1113	54.4039	51.391	51.9045	40.9899	ATP binding protein
Csa1M605720.1	70.6893	71.1528	73.8957	63.8621	72.3545	66.343	83.7533	Selenoprotein
Csa4M288620.1	70.6848	75.8036	120.456	164.674	69.0401	66.7443	114.237	BRASSINSTERID INSENSITIVE 1-associated receptor kinase 1
Csa1M701930.1	70.6811	66.5601	105.213	95.7473	92.687	72.0075	59.3668	Proteasome subunit alpha type
Csa4M268010.1	70.6454	71.8828	58.8316	55.4596	67.7636	53.6123	45.181	Protein kinase C substrate 80K-H
Csa6M008580.1	70.6336	71.502	46.4207	54.4613	42.0382	45.4291	35.3536	Plant UBX domain-containing protein 1
Csa3M881870.1	70.5848	66.4775	73.147	110.567	97.5487	132.952	146.125	WRKY protein
Csa1M642540.1	70.5641	74.4967	215.925	54.2418	89.9343	80.4303	96.2489	Seed maturation protein PM37
Csa2M245410.1	70.5526	65.3912	54.1622	24.7982	39.6509	49.4238	40.3815	Sugar transporter
Csa6M526450.1	70.5138	74.552	34.1487	56.525	66.4607	59.6608	75.9774	Heavy metal ATPase
Csa7M069720.1	70.4918	71.4047	11.2416	22.9533	10.1637	29.2583	17.3493	DUF21 domain-containing protein
Csa2M338810.1	70.4295	77.705	73.4865	79.2448	61.1155	66.9877	48.6753	SNARE
Csa5M409710.1	70.4128	67.4055	255.554	179.461	137.739	114.563	73.6804	Microsomal glutathione s-transferase
Csa3M253490.1	70.3404	66.0412	107.977	66.9371	70.1633	81.1735	98.7014	WD-repeat protein
Csa7M239010.1	70.3273	66.4337	224.716	92.3541	147.152	86.4632	93.1191	Phosphoglycerate kinase
Csa5M092910.1	70.2445	65.3458	61.2276	62.8212	48.4185	63.4048	42.5189	GAGA-motif binding transcriptional activator
Csa6M223500.1	70.2213	70.4459	7.7278	15.7613	5.86841	45.0207	53.374	Isoprenylcysteine alpha-carbonyl methylesterase ICME
Csa6M293930.1	70.2185	66.661	84.3671	62.8208	47.3953	86.963	72.0044	Sec61beta
Csa5M056100.1	70.1522	73.1735	48.9408	50.1055	47.5773	53.4096	42.1979	Anthranilate synthase, beta subunit, ASB1
Csa5M548150.1	70.1313	71.8256	66.9604	87.3987	88.9399	66.2586	66.8382	Protein BERN 3
Csa3M116780.1	70.1104	71.5938	81.9572	54.9547	51.5653	40.4665	30.8734	Mago nashi 1
Csa7M206940.1	70.0517	72.6099	85.7219	74.56	72.6809	62.0112	50.4049	Small nuclear ribonucleoprotein E
Csa5M426430.1	70.0428	72.7709	87.2251	87.6673	68.0235	68.9857	50.9995	Eukaryotic translation initiation factor 3 subunit
Csa7M030510.1	70.0298	76.2441	118.542	103.403	178.829	102.905	145.797	Glucose-1-phosphate adenylyltransferase
Csa2M176690.1	70.0241	71.1255	41.6295	48.3301	114.877	169.544	162.943	Proline-rich protein
Csa6M522710.1	70.0195	72.7276	148.231	202.098	116.271	104.902	92.7056	BHLH1 transcription factor
Csa1M043130.1	69.9926	65.932	171.01	87.5219	105.161	52.2883	48.6549	Succinyl-CoA ligase [GDP-forming] subunit alpha-2, mitochondrial
Csa7M004130.1	69.9694	70.6877	50.8502	40.0968	59.96	61.0316	55.7631	Vacuolar proton atpase
Csa3M717370.1	69.9492	66.1828	38.6183	86.855	42.0912	41.496	52.3727	Cinnamoyl-CoA reductase 4
Csa4M621720.1	69.9404	85.4222	221.526	108.714	273.174	161.267	80.18	Cytochrome P450 monooxygenase CYP72A59
Csa6M408810.1	69.884	70.4048	87.8957	136.863	105.205	86.1633	95.5324	Glutathione peroxidase
Csa2M123610.1	69.8771	60.0343	13.6898	21.2196	9.24897	63.5387	20.9684	ARGS
Csa1M320350.1	69.8447	68.4345	65.7138	58.1583	61.0404	66.1693	56.6443	Protein HLJ1
Csa7M447850.1	69.8126	67.2138	116.525	112.593	156.707	73.4312	79.2372	Autoinhibited calcium ATPase
Csa2M021560.1	69.7379	62.1261	105.97	139.956	91.6459	72.5587	213.193	RING/c3HC4/PHD zinc finger
Csa7M281370.1	69.6912	71.1544	67.6704	53.397	67.4235	53.2356	40.7903	Eukaryotic translation initiation factor 3 subunit
Csa5M517160.1	69.6612	64.6039	58.7702	39.9797	44.5588	67.0823	57.9235	Protein kinase APK1B, chloroplast
Csa3M728010.1	69.6278	74.2602	53.0273	45.8117	55.4813	95.2668	76.0145	PV72
Csa1M042290.1	69.6083	69.1302	36.261	79.1454	49.6075	67.7734	31.708	AP2/ERF domain-containing transcription factor
Csa7M184650.1	69.5793	68.6791	51.0414	40.8415	50.9864	60.3698	44.9327	Signalosome subunit
Csa4M617390.1	69.5507	71.7972	98.8403	40.8194	110.03	57.4456	27.9594	Heat shock 70 kDa protein
Csa4M179170.1	69.5366	72.9109	167.069	57.0806	85.2386	72.2379	56.0118	Heat shock 70 kDa protein, mitochondrial
Csa4M653460.1	69.5266	52.1817	231.555	114.386	105.724	80.206	85.3085	NADH dehydrogenase [ubiquinone] 1 beta subcomplex subunit 2
Csa1M004980.1	69.4603	70.3285	31.5678	50.2786	42.4596	45.7458	30.1681	EXECUTER1 protein, chloroplast
Csa5M548130.1	69.4114	68.5216	108.944	159.59	150.337	61.5709	37.1975	Xyloglucan endotransglucosylase/hydrolase 13
Csa4M594470.1	69.4022	73.6663	175.225	89.6642	108.887	68.1369	72.3261	Proteasome subunit alpha type
Csa1M600830.1	69.3962	72.3249	9.34655	15.6399	17.6754	29.138	13.754	BZIP1
Csa4M016420.1	69.3182	69.6012	127.387	52.9491	62.4912	45.3526	68.8658	Serine/threonine-protein kinase PBS1
Csa3M856010.1	69.296	70.2743	50.1678	88.5561	39.3675	52.4481	43.2113	Lrr receptor protein kinase
Csa6M486940.1	69.2853	77.5266	138.043	126.885	117.402	90.5005	62.6069	ATP synthase 24 kDa subunit, mitochondrial
Csa2M327510.1	69.1583	67.2466	47.5564	47.9785	40.9894	34.9015	24.6832	Kelch repeat-containing protein
Csa4M017180.1	69.154	69.429	54.1394	44.0299	42.9654	39.2417	24.0513	GTPase
Csa4M046790.1	69.1421	62.642	63.9537	58.5261	31.082	59.4313	70.2763	Parvulin-type peptidyl-prolyl cis/trans isomerase
Csa3M257590.1	69.049	71.6255	55.5305	53.2024	58.482	75.561	48.5936	Hexose transporter
Csa2M371090.1	69.0037	69.7898	50.3169	48.7493	46.0964	40.4312	38.2167	Adenine nucleotide alpha hydrolases
Csa6M422820.1	69.0034	69.3097	95.4272	49.0371	78.2879	55.0906	52.6367	ATP synthase subunit d
Csa3M734060.1	68.9506	67.4859	79.3129	48.8805	65.1204	48.3649	43.2016	Coatomer delta subunit
Csa1M031810.1	68.9238	60.0637	93.3138	36.3045	45.6914	52.7939	38.5778	Eukaryotic translation initiation factor 3 subunit G
Csa2M361800.1	68.8644	72.1921	156.832	74.1086	103.072	73.2866	68.8424	Protein yrdA
Csa3M819960.1	68.8644	75.898	72.9979	76.9584	70.5386	83.2315	87.278	TGA-type basic leucine zipper protein TGA2.2
Csa6M017000.1	68.8644	67.2798	62.0023	58.5116	59.8304	69.3409	52.3944	RBP50
Csa1M524700.1	68.8112	62.53	44.9615	50.4395	40.8258	51.9907	40.8697	Copper ion binding protein
Csa2M377360.1	68.8073	68.8086	140.18	89.3799	95.693	76.3239	76.0655	Proteasome subunit beta type
Csa3M780540.1	68.7936	66.2314	57.8099	45.4497	28.6966	28.7207	33.9983	Conserved gene of unknown function
Csa3M198490.1	68.7594	60.6524	6.24145	0	0	12.2116	14.8279	Indole-3-acetic acid-amido synthetase GH3.3
Csa2M169190.1	68.753	67.3022	56.5763	60.0371	49.6943	72.3818	65.5391	Nucleotide binding protein
Csa1M225390.1	68.7372	70.8037	36.8347	35.5948	45.1147	42.487	38.0323	ATP binding protein
Csa2M100580.1	68.6333	71.8996	179.645	75.2143	166.537	96.6158	170.59	Membrane associated ring finger 1,8
Csa7M368740.1	68.6236	68.2777	80.5324	69.7954	87.841	116.357	107.158	FRIGIDA
Csa3M822210.1	68.6065	63.8325	74.4135	89.753	109.504	69.7311	66.89	Cellular retinaldehyde-binding/triple function, C-terminal
Csa1M528540.1	68.5727	72.45	61.7619	86.1959	117.479	185.588	78.0066	Hydrolase, hydrolyzing -glycosyl compounds
Csa3M851930.1	68.5285	68.8908	15.3033	0	21.3831	69.2998	9.21914	Gene of unknown function
Csa1M627500.1	68.5119	65.8952	37.8766	32.3485	36.7598	42.7704	31.7763	Signal recognition particle 68 kDa protein
Csa3M850580.1	68.4864	74.4318	14.0692	33.0346	24.6946	27.7211	35.2143	BRASSINSTERID INSENSITIVE 1-associated receptor kinase 1
Csa7M073550.1	68.4756	71.5607	133.503	114.477	112.87	120.977	176.648	FLDED PETALS
Csa5M177100.1	68.4204	67.7703	42.6845	48.4152	52.4208	42.938	42.6922	Erythroblast macrophage protein emp
Csa4M004870.1	68.415	50.485	49.7465	28.7444	23.3121	23.8619	26.7524	Conserved gene of unknown function
CsaUNM031640.1	68.3967	56.7732	84.2732	93.2855	79.7615	45.1132	100.673	DNA-binding protein RAV1
Csa1M062890.1	68.3895	80.3605	113.856	161.851	91.092	127.742	116.179	Gaba(A) receptor-associated protein
Csa3M202220.1	68.3825	71.553	68.4615	58.2182	54.6041	49.8476	57.2392	CBS domain-containing protein CBSX2, chloroplastic
Csa3M183290.1	68.3579	75.8706	62.5449	59.6864	65.0351	52.4792	55.7455	Hydroxyproline-rich glycoprotein family protein
Csa3M122550.1	68.3207	67.3231	79.656	66.8189	60.1137	59.6165	42.7543	Pre-mRNA cleavage factor im, 25kD subunit
Csa4M563190.1	68.3105	65.8495	47.3572	34.2056	39.852	35.1613	28.1958	Anthranilate synthase alpha subunit
Csa4M279790.2	68.2916	72.1	147.028	85.0937	78.6398	58.8174	70.0818	Calmodulin 5
Csa7M432450.1	68.2888	69.2431	28.7196	106.493	43.6064	64.9266	125.76	Chloroplast post-illumination chlorophyll fluorescence increase protein
Csa3M781560.1	68.2872	66.9431	31.9166	39.5082	30.866	56.9434	23.5375	MRNA, clone: RTFL01-16-D19
Csa2M270730.1	68.2081	70.7542	36.8087	48.1895	50.2454	56.8192	50.9783	KAK (KAKTUS) isoform 2
Csa5M638310.1	68.1758	72.0934	64.423	77.0349	50.7232	85.3864	41.3662	Prefoldin subunit
Csa5M598630.1	68.1688	73.3675	15.4306	24.3308	18.8976	17.4636	17.9047	Cticosapeptide/Phox/Bem1p domain-containing protein
Csa4M307910.1	68.1475	71.0419	63.6113	74.5771	79.9088	57.8431	57.0663	Alpha-carboxyltransferase subunit
Csa7M043010.1	68.1459	68.8409	117.783	96.5594	92.8967	101.794	72.3922	Carboxymethylenebutenolidase
Csa3M076560.1	68.1318	63.1526	0	0	0	0	0	Conserved gene of unknown function
Csa4M495220.1	68.1039	67.8971	34.5031	34.4111	37.214	45.1545	35.91	CBS / octicosapeptide/Phox/Bemp1 domain-containing protein
Csa5M642150.1	68.0988	68.1501	57.2735	60.8523	48.2535	38.5097	44.4433	Serine/threonine-protein kinase PBS1
Csa2M401990.1	68.0614	68.6717	77.7213	107.217	67.3036	111.427	75.5301	Transcription initiation factor IIA subunit 2
Csa3M915110.1	68.0613	62.222	129.739	106.819	95.2022	97.6311	93.4991	Steroid binding protein
Csa3M731040.1	68.0594	67.0909	41.0394	60.6027	46.0814	57.9828	53.3671	Suppressor of actin
Csa5M589950.1	67.985	68.1475	121.598	77.2419	76.6217	53.2815	33.7194	Ribosomal petrp
Csa7M451920.1	67.9331	63.3043	43.5268	95.2237	29.0605	9.80604	97.2477	Phosphoethanolamine/phosphocholine phosphatase
Csa5M637740.1	67.9211	66.8854	68.913	57.1406	64.8811	74.6204	62.7988	Vesicle transport V-snare protein vti1a
Csa7M060170.1	67.8837	72.685	47.6787	51.427	46.7632	56.4157	48.8519	Kelch repeat-containing F-box family protein
Csa5M576660.1	67.8517	68.8414	67.2604	61.3707	57.4721	88.3483	71.7434	Fructose-bisphosphate aldolase
Csa4M355130.1	67.821	57.6751	57.9499	98.4619	54.9334	61.5542	97.1653	Calcium-binding allergen le e
Csa3M166230.1	67.7836	70.2506	30.8363	49.4976	37.1148	50.9136	35.0465	Component of IIS longevity pathway SMK-1 domain-containing protein
Csa5M528950.1	67.7492	57.0841	240.722	95.1427	118.702	104.449	110.361	Conserved gene of unknown function
Csa5M599830.1	67.7321	69.4493	17.9799	44.9636	20.9141	72.1926	65.0806	Alpha-glucan water dikinase, chloroplast
Csa5M631500.1	67.7157	74.3295	71.3537	58.0153	55.6226	58.2137	38.1989	GTP-binding protein
Csa7M219810.1	67.7143	68.0327	61.5141	49.2268	55.258	71.2499	75.4196	Protein transporter
Csa7M073780.1	67.6498	60.64	30.6992	77.8955	22.3515	38.3289	30.0262	AR781
Csa4M645850.1	67.5282	60.2946	24.1	31.6487	80.0035	57.0387	96.3798	C3HL domain class transcription factor
Csa3M750920.1	67.4732	64.6043	251.07	118.722	192.038	131.953	127.212	Fructose-bisphosphate aldolase
Csa5M171740.1	67.4692	69.1623	124.116	62.533	76.4393	54.986	37.7696	60S ribosomal protein L7a
Csa3M002910.1	67.4672	70.3562	56.082	95.2107	68.4784	74.3221	78.0946	Serine/threonine protein kinase
Csa5M181460.1	67.4508	64.258	80.5054	67.4269	59.3567	54.3414	49.9818	Serine/arginine rich splicing factor
Csa1M569300.1	67.4501	67.7965	83.1159	71.7768	77.3737	73.2986	70.4024	Tat binding protein
Csa3M560760.1	67.4484	68.753	46.7782	39.095	47.536	60.9422	51.899	Zinc finger protein
Csa4M340000.1	67.4297	71.3618	63.6738	70.7961	50.6868	53.801	38.8064	UDP-N-acetylglucosamine--dolichyl-phosphate N-acetylglucosaminephosphotransferase
Csa5M152960.1	67.4046	68.3912	36.9194	64.9509	52.483	56.4266	51.255	Zinc finger family protein
Csa1M084310.1	67.3039	70.6112	44.6778	30.8816	50.2531	53.8299	33.7827	Leucyl-tRNA synthetase
Csa2M401360.1	67.2759	66.8682	58.4203	54.7179	62.5205	54.4233	45.695	Histidyl-tRNA synthetase
Csa6M009500.1	67.272	68.8347	62.0013	110.693	74.9329	95.7497	96.9178	Proteophosphoglycan ppg3
Csa5M157380.1	67.2475	63.861	39.9124	68.7461	43.7883	46.2899	29.602	Acc synthase
Csa1M599400.1	67.2296	70.5246	24.6048	27.3105	33.3091	80.9615	68.6142	Branched-chain alpha-keto acid decarboxylase E1 beta subunit
Csa5M266830.1	67.2256	67.13	87.3721	60.248	65.7327	56.5828	46.185	Eukaryotic translation initiation factor 2 gamma subunit
Csa6M490850.1	67.1646	68.6216	33.0298	47.9845	44.288	52.0927	42.4025	Conserved gene of unknown function
Csa3M308190.1	67.1187	69.0213	25.3575	98.1027	60.2732	62.1142	163.317	E3 ubiquitin ligase PUB14
Csa5M244150.1	67.1068	69.7679	112.151	78.6739	67.6006	48.1778	39.7334	Cytochrome c
Csa1M572450.1	67.0942	67.3367	61.4475	59.8389	44.3198	57.4036	39.0661	Gibberellin receptor
Csa7M450630.1	67.0546	68.6789	17.563	21.7209	31.2756	25.2803	24.21	Mitochondrial carrier protein RIM2
Csa1M302180.1	67.0361	67.0688	106.875	89.9296	95.2844	64.7167	66.92	ATSUG1
Csa6M108490.1	66.9887	62.4721	130.874	84.6019	106.903	90.6798	86.0928	Tic20
Csa1M075560.1	66.91	71.0887	67.2957	106.86	77.9116	120.267	169.239	MRNA, clone: RTFL01-47-G18
Csa6M500550.1	66.9091	66.8905	30.8264	75.035	42.8293	86.5264	106.145	DREB1C
Csa5M623540.1	66.8642	65.6915	137.456	119.556	121.464	71.7565	66.8363	ATP synthase d chain
Csa5M615810.1	66.8006	63.4485	58.689	98.1919	43.2481	71.2741	75.1001	Cysteine-type peptidase
Csa3M038740.1	66.7866	71.0643	81.2068	54.2643	64.2368	67.045	74.8574	Cleavage and polyadenylation specificity factor
Csa4M269780.1	66.7493	69.4683	93.1504	46.6949	85.9013	27.2305	24.716	CBL-interacting protein kinase 18
Csa6M041200.1	66.7375	70.8389	64.3735	42.0325	45.4146	48.1272	41.025	UDP-galactose transporter 6
Csa3M038140.1	66.7357	64.9375	62.1051	87.3636	110.656	63.8208	76.0353	PGR5 1A, chloroplastic
Csa1M002860.1	66.7143	66.6556	135.047	132.395	102.554	88.9699	121.513	BRASSINSTERID INSENSITIVE 1-associated receptor kinase 1
Csa7M374660.1	66.7124	69.36	105.959	66.2945	75.7181	64.7928	52.9746	XPA-binding protein
Csa3M016390.1	66.6905	68.8439	60.5048	53.0714	64.2005	47.2854	46.5561	Phenylalanyl-tRNA synthetase alpha chain
Csa6M157120.1	66.643	75.8016	162.976	165.793	130.124	111.288	89.5323	Rf protein
Csa1M569470.1	66.643	53.4658	122.395	135.611	127.217	68.0229	128.645	SRC2
Csa4M009900.1	66.5421	71.9478	10.6503	20.8974	13.1376	39.1618	23.6275	Inositol polyphosphate multikinase
Csa5M179760.1	66.478	76.8855	32.5358	34.126	44.9382	26.5528	33.6979	Dehydroascorbate reductase
Csa2M033340.1	66.4622	60.0935	55.9062	251.468	54.4232	45.8511	98.7347	Gene of unknown function
Csa4M326550.1	66.413	63.5076	0	0	0	30.7344	14.2995	Alanine-glyoxylate aminotransferase
Csa3M135700.1	66.3898	61.3375	54.9771	79.2948	55.022	49.2296	37.2274	CmE8 protein
Csa4M340540.1	66.3796	73.1003	148.061	84.1221	101.858	94.0821	90.9349	Calmodulin
Csa2M060480.1	66.3373	70.2471	65.7817	109.214	77.6445	110.487	94.7425	Core-2/I-branching beta-1,6-N-acetylglucosaminyltransferase family protein
Csa2M360580.1	66.3253	72.4637	20.9559	31.9473	26.6331	40.9176	41.4832	Hydrolase
Csa2M036680.1	66.3139	62.3574	33.5583	548.27	54.3935	531.381	430.523	S-adenosylmethionine decarboxylase proenzyme
Csa7M397570.1	66.236	69.9998	54.2349	54.069	66.3353	98.8597	83.151	DNA photolyase
Csa5M178700.1	66.1901	63.7428	132.826	234.422	208.709	141.619	328.7	Exocyst complex component
Csa3M734360.1	66.1736	63.1105	56.5293	38.2813	43.4772	41.4938	29.6509	Arf gtpase-activating protein
Csa6M127480.1	66.114	68.7158	25.8725	47.541	88.5503	62.0201	72.0918	Cell division protein kinase
Csa3M203270.1	66.1098	67.0589	19.3319	29.2724	36.8521	17.878	22.2868	U-box domain-containing protein
Csa5M198750.1	66.0726	60.4616	76.3063	91.8591	81.1107	72.5895	55.4043	Microsomal signal peptidase 25 kD subunit
Csa2M379100.1	66.0448	58.4677	50.6561	48.3851	33.1831	39.446	25.7654	SelT/selW/selH selenoprotein domain containing protein
Csa3M126780.1	65.9552	65.2352	60.815	53.9596	56.7244	67.4568	57.3376	Methionine aminopeptidase
Csa3M127080.1	65.9546	63.8475	28.4619	29.8369	35.8381	46.4852	32.1197	5-hydroxyisourate hydrolase
Csa1M589750.1	65.9188	69.3973	79.123	85.9107	92.1356	80.7106	74.5856	Mitogen-activated protein kinase kinase MAPKK2
Csa6M076760.1	65.9098	61.9147	57.597	54.6322	55.0761	48.1768	50.3015	Calcium lipid binding protein
Csa1M627410.1	65.8703	59.7702	108.842	93.0424	86.1388	75.3762	88.6129	Mitochondrial fission 1 protein
Csa6M179470.1	65.8703	55.738	57.6749	42.9522	30.4204	45.7198	21.06	Gene of unknown function
Csa5M622670.1	65.7985	62.3445	35.8395	43.3419	31.2675	37.9526	41.7814	Thioredoxin-like 3-2, chloroplastic
[truncated: 13,289 more rows]
