# Supplementary material for: Expression Profiling of Cucumis sativus in Response to Infection by Pseudoperonospora cubensis
Source: PLoS One. 2012 Apr 24;7(4):e34954. doi: 10.1371/journal.pone.0034954 (PMC3335828; doi:10.1371/journal.pone.0034954)
Supplement: Table S2 — List of the top 20 genes highly expressed at different time points and control, their FPKM (fragments per kilobase pair of exon model per million fragments mapped) values and putative function as determined by BLASTX searches against UniRef100 (E-value cutoff 1e-5), and Pfam protein family and domain search. (XLS) [file pone.0034954.s004.xls]

## Sheet: TableS2
Table S2. List of to 20 genes highly expressed at different time-points and control, their FPKM values and putative function as determined by BLASTX searches against UniRef100 (E-value cutoff 1e-5) and Pfam protein family and domain search.
Time-point	Gene ID	FPKM value	Putative function
1 dpi§	Csa4M094520.1	1928.33	14-3-3 protein 2
1 dpi	Csa6M356990.1	3261.64	Catalase
1 dpi	Csa5M027940.1	2060.13	Cell number regulator 2
1 dpi	Csa5M613470.1	2443.91	DnaJ protein homolog
1 dpi	Csa2M139820.1	1994.78	Elongation factor 1-alpha
1 dpi	Csa6M000080.1	8869.08	Galactinol synthase
1 dpi	Csa4M025140.1	2759.94	Glutamate dehydrogenase
1 dpi	Csa2M420990.1	2666.15	Isocitrate lyase
1 dpi	Csa4M286960.1	3067.26	Lipoxygenase
1 dpi	Csa3M105950.1	2992.31	Metallothionein type 3
1 dpi	Csa6M507370.1	3318.6	Rhodanese - like
1 dpi	Csa7M447990.1	2059.97	Pectinesterase 3
1 dpi	Csa4M285730.1	4445.9	Peroxidase
1 dpi	Csa4M285780.1	2359.84	Peroxidase
1 dpi	Csa1M696520.1	2879.25	Phosphorylase protein
1 dpi	Csa7M398090.1	4301.37	Protein induced upon tuberization
1 dpi	Csa5M609710.1	2356.03	Ribulose bisphosphate carboxylase small chain, chloroplastic
1 dpi	Csa6M517220.1	2555.55	Stem-specific protein TSJT1
1 dpi	Csa3M154390.1	3370.95	Translationally-controlled tumor protein homolog
1 dpi	Csa5M285030.1	5908.83	Wound-induced proteinase inhibitor 1
2 dpi	Csa6M356990.1	2914.02	Catalase
2 dpi	Csa5M139760.1	3638.75	Chitinase
2 dpi	CsaUNM030430.1	4460.19	Conserved gene of unknown function
2 dpi	Csa6M338110.1	2557.73	Conserved gene of unknown function
2 dpi	Csa2M139820.1	3523.7	Elongation factor 1-alpha
2 dpi	Csa7M312940.1	3899.86	Extensin
2 dpi	Csa6M000080.1	6149.29	Galactinol synthase
2 dpi	Csa4M000860.1	2416.1	Gene of unknown function
2 dpi	Csa2M247040.1	2189.82	Glycine-rich RNA-binding protein
2 dpi	Csa1M008570.1	2150.01	Hypersensitive-induced response protein
2 dpi	Csa3M105950.1	11862.7	Metallothionein type 3
2 dpi	Csa7M072780.1	10016.1	NtPRp27
2 dpi	Csa7M037610.1	8680.4	Pathogen-induced protein CuPi1
2 dpi	Csa7M009740.1	2442.24	Peptidyl-prolyl cis-trans isomerase
2 dpi	Csa4M285730.1	9200.32	Peroxidase
2 dpi	Csa4M285780.1	2284.26	Peroxidase
2 dpi	Csa5M609710.1	3213.85	Ribulose bisphosphate carboxylase small chain, chloroplastic
2 dpi	Csa5M155450.1	4297.09	Smotin
2 dpi	Csa7M432480.1	2195.74	Stellacyanin
2 dpi	Csa3M154390.1	2543.22	Translationally-controlled tumor protein homolog
3 dpi	Csa6M356990.1	3873.74	Catalase
3 dpi	Csa5M139760.1	2428.02	Chitinase
3 dpi	Csa6M338110.1	2035.36	Conserved gene of unknown function
3 dpi	Csa4M651970.1	1751.17	Eukaryotic translation initiation factor 5A
3 dpi	Csa7M312940.1	2488.81	Extensin
3 dpi	Csa6M000080.1	8021.04	Galactinol synthase
3 dpi	Csa4M000860.1	5817.59	Gene of unknown function
3 dpi	Csa2M247040.1	2127.31	Glycine-rich RNA-binding protein
3 dpi	Csa1M008570.1	2342.19	Hypersensitive-induced response protein
3 dpi	Csa3M105950.1	10341.2	Metallothionein type 3
3 dpi	Csa7M072780.1	7617.38	NtPRp27
3 dpi	Csa7M037610.1	6731.21	Pathogen-induced protein CuPi1
3 dpi	Csa4M285730.1	4210.11	Peroxidase
3 dpi	Csa4M285770.1	1693.83	Peroxidase
3 dpi	Csa3M142960.1	1996.24	Protease inhibitor
3 dpi	Csa7M398090.1	2016.26	Protein induced upon tuberization
3 dpi	Csa5M609710.1	2423.11	Ribulose bisphosphate carboxylase small chain, chloroplastic
3 dpi	Csa5M155450.1	3890.45	Smotin
3 dpi	Csa3M154390.1	3695.01	Translationally-controlled tumor protein homolog
3 dpi	Csa5M285030.1	1957.72	Wound-induced proteinase inhibitor 1
4 dpi	Csa6M356990.1	4202.1	Catalase
4 dpi	Csa5M139760.1	6571.98	Chitinase
4 dpi	CsaUNM030430.1	2826.09	Conserved gene of unknown function
4 dpi	Csa7M312940.1	7188.24	Extensin
4 dpi	Csa6M058200.1	2682.18	Extensin
4 dpi	Csa6M000080.1	4647.57	Galactinol synthase
4 dpi	Csa4M000860.1	6372.56	Gene of unknown function
4 dpi	Csa1M008570.1	2341.37	Hypersensitive-induced response protein
4 dpi	Csa2M021000.1	3151.9	Kunitz-type protease inhibitor KPI-F4
4 dpi	Csa3M105950.1	5422.5	Metallothionein type 3
4 dpi	Csa7M072780.1	9117.57	NtPRp27
4 dpi	Csa7M037610.1	6007.96	Pathogen-induced protein CuPi1
4 dpi	Csa4M285730.1	6656.2	Peroxidase
4 dpi	Csa4M285780.1	3676.64	Peroxidase
4 dpi	Csa4M285770.1	3086.26	Peroxidase
4 dpi	Csa3M142960.1	3555.45	Protease inhibitor
4 dpi	Csa5M609710.1	6469.53	Ribulose bisphosphate carboxylase small chain, chloroplastic
4 dpi	Csa5M155450.1	9031.65	Smotin
4 dpi	Csa2M010390.1	3599.97	Wound-induced protein WIN2
4 dpi	Csa5M285030.1	3677	Wound-induced proteinase inhibitor 1
6 dpi	Csa6M356990.1	3646.54	Catalase
6 dpi	Csa5M139760.1	4238.12	Chitinase
6 dpi	Csa6M133710.1	2828.36	Cinnamate-4-hydroxylase
6 dpi	CsaUNM030430.1	5000.84	Conserved gene of unknown function
6 dpi	Csa7M312940.1	7199.37	Extensin
6 dpi	Csa6M058200.1	3151.93	Extensin
6 dpi	Csa6M000080.1	3208.43	Galactinol synthase
6 dpi	Csa4M000860.1	18966	Gene of unknown function
6 dpi	Csa4M000820.1	4854.09	Gene of unknown function
6 dpi	Csa2M021000.1	18327.5	Kunitz-type protease inhibitor KPI-F4
6 dpi	Csa1M043200.1	4179.87	Miraculin
6 dpi	Csa2M021500.1	2941.26	Miraculin
6 dpi	Csa7M037610.1	3743.1	Pathogen-induced protein CuPi1
6 dpi	Csa4M285730.1	3437.41	Peroxidase
6 dpi	Csa3M142960.1	6227.18	Protease inhibitor
6 dpi	Csa7M398090.1	6909.89	Protein induced upon tuberization
6 dpi	Csa5M155450.1	9412.01	Smotin
6 dpi	Csa3M154390.1	3340.91	Translationally-controlled tumor protein homolog
6 dpi	Csa2M010390.1	12933.1	Wound-induced protein WIN2
6 dpi	Csa5M285030.1	15536.3	Wound-induced proteinase inhibitor 1
8 dpi	Csa6M356990.1	3239.99	Catalase
8 dpi	Csa6M133710.1	4223.3	Cinnamate-4-hydroxylase
8 dpi	CsaUNM030430.1	3230.06	Conserved gene of unknown function
8 dpi	Csa6M507520.1	3934.53	Endochitinase MCHT-2
8 dpi	Csa7M312940.1	8364.33	Extensin
8 dpi	Csa4M000860.1	19862.6	Gene of unknown function
8 dpi	Csa4M000820.1	7936.1	Gene of unknown function
8 dpi	Csa1M008570.1	2991.64	Hypersensitive-induced response protein
8 dpi	Csa2M021000.1	34017.4	Kunitz-type protease inhibitor KPI-F4
8 dpi	Csa3M105950.1	3828.05	Metallothionein type 3
8 dpi	Csa7M072780.1	4516.1	NtPRp27
8 dpi	Csa7M037610.1	3010.02	Pathogen-induced protein CuPi1
8 dpi	Csa4M285770.1	3810.38	Peroxidase
8 dpi	Csa5M167220.1	3564.5	Peroxidase
8 dpi	Csa4M285780.1	2949.16	Peroxidase
8 dpi	Csa3M142960.1	12285.1	Protease inhibitor
8 dpi	Csa7M398090.1	3450.4	Protein induced upon tuberization
8 dpi	Csa5M155450.1	12911.9	Smotin
8 dpi	Csa2M010390.1	19927.2	Wound-induced protein WIN2
8 dpi	Csa5M285030.1	14778.1	Wound-induced proteinase inhibitor 1
mock	Csa3M110620.1	7311.66	Elongation factor 1-gamma
mock	Csa7M056470.1	7139.41	Actin
mock	Csa7M447830.1	6556.65	60S ribosomal protein L7-4
mock	Csa3M556200.1	5621.35	Heat shock protein
mock	Csa3M857060.1	5420.56	Gene of unknown function
mock	Csa4M038770.1	5413.37	40S ribosomal protein SA
mock	Csa1M537560.1	5259.17	Beta-tubulin
mock	Csa3M110630.1	5194.31	Elongation factor 1 gamma
mock	Csa3M389830.1	5173.24	Actin-depolymerizing factor 6
mock	Csa2M369060.1	4423.62	40S ribosomal protein S6
mock	Csa3M750390.1	4416	Gene of unknown function
mock	Csa3M135010.1	4261.56	60S ribosomal protein L7-4
mock	Csa5M152800.1	4255.81	40S ribosomal protein S10
mock	Csa3M403970.1	4207.93	60S ribosomal protein L8
mock	Csa3M687730.1	4199.51	Ribosomal protein
mock	Csa4M295440.1	3872.32	Heat shock protein 70
mock	Csa5M495920.1	3368.79	Elongation factor 1-alpha
mock	Csa3M062610.1	3232.64	Mitochondrial import inner membrane translocase subunit Tim17
mock	Csa3M634310.1	3228.5	Heat shock protein 70 (HSP70)-interacting protein
mock	Csa3M912980.1	3221.53	60S ribosomal protein L7
§dpi, days post-inoculation.
